# Supplementary material
Source: ML conference proceedings conference paper supplement (https://openreview.net/forum?id=cUdODCFjUM)

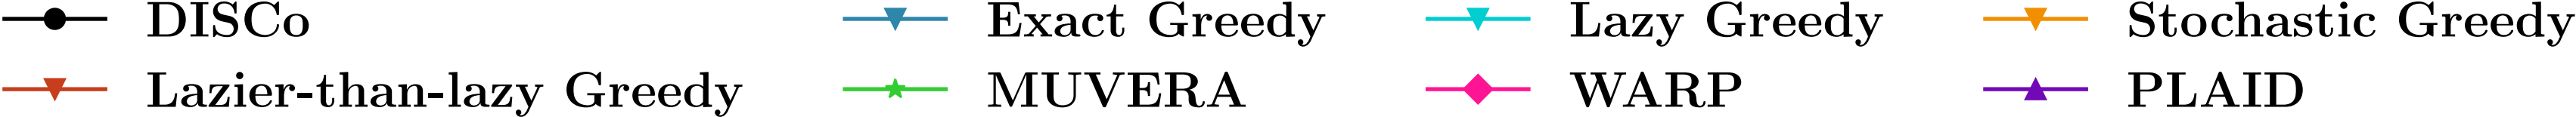

Supplement: supplementary_material [file covK_supp_legend.pdf › DISCO/notebooks/plots/covK_supp_legend.pdf]

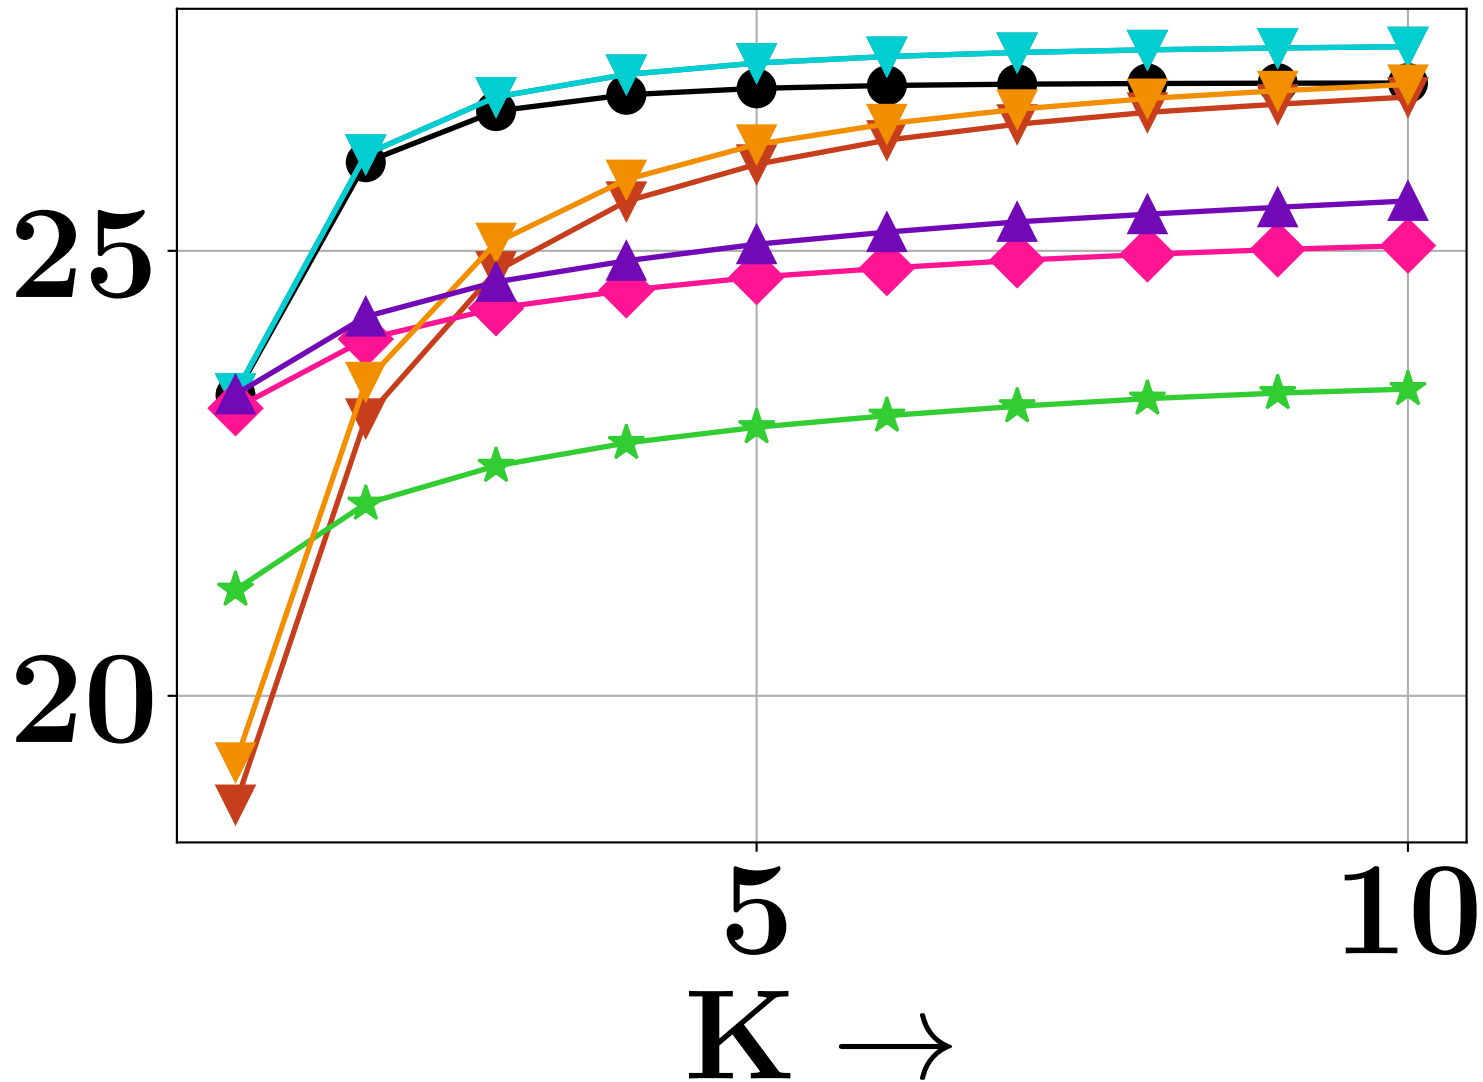

Supplement: supplementary_material [file fever_covK_supp.pdf › DISCO/notebooks/plots/fever_covK_supp.pdf]

25

20

1

3

5

7

10

Efficiency  $\rightarrow$ 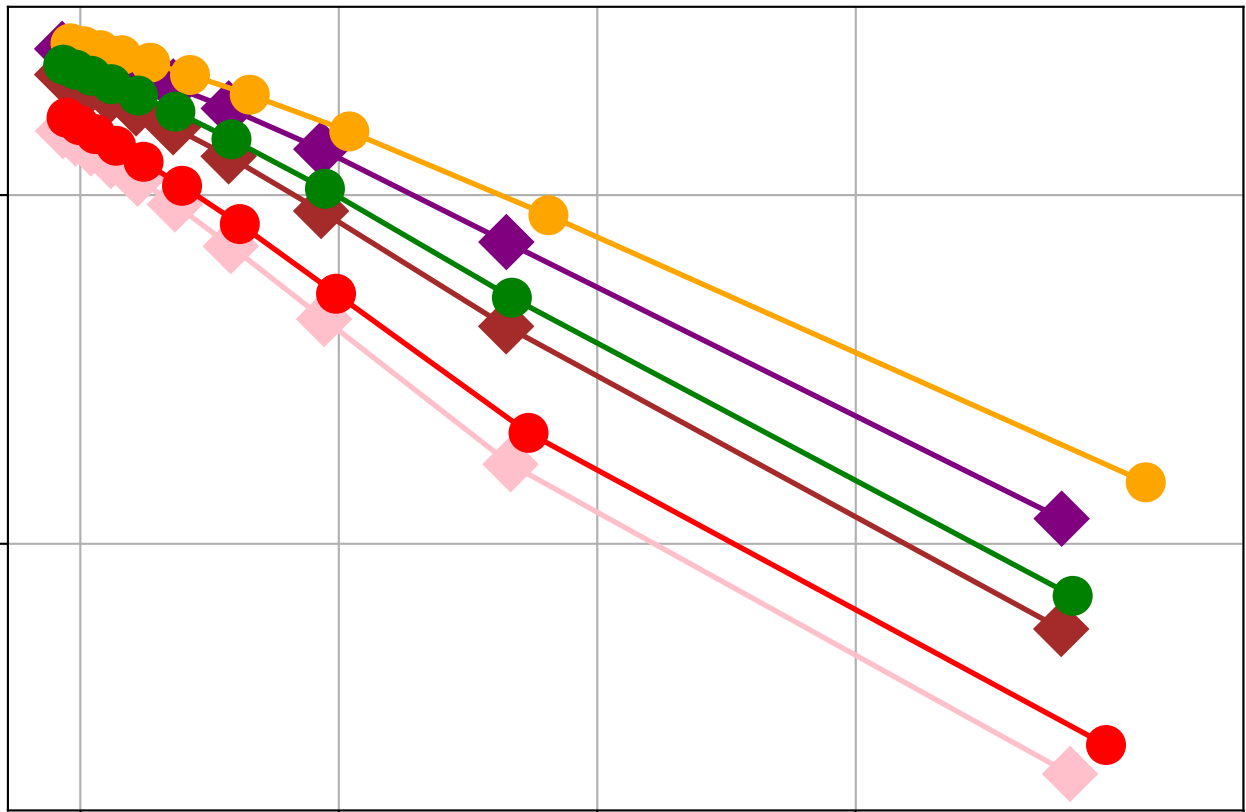

Supplement: supplementary_material [file fever_greedy_supp.pdf › DISCO/notebooks/plots/fever_greedy_supp.pdf]

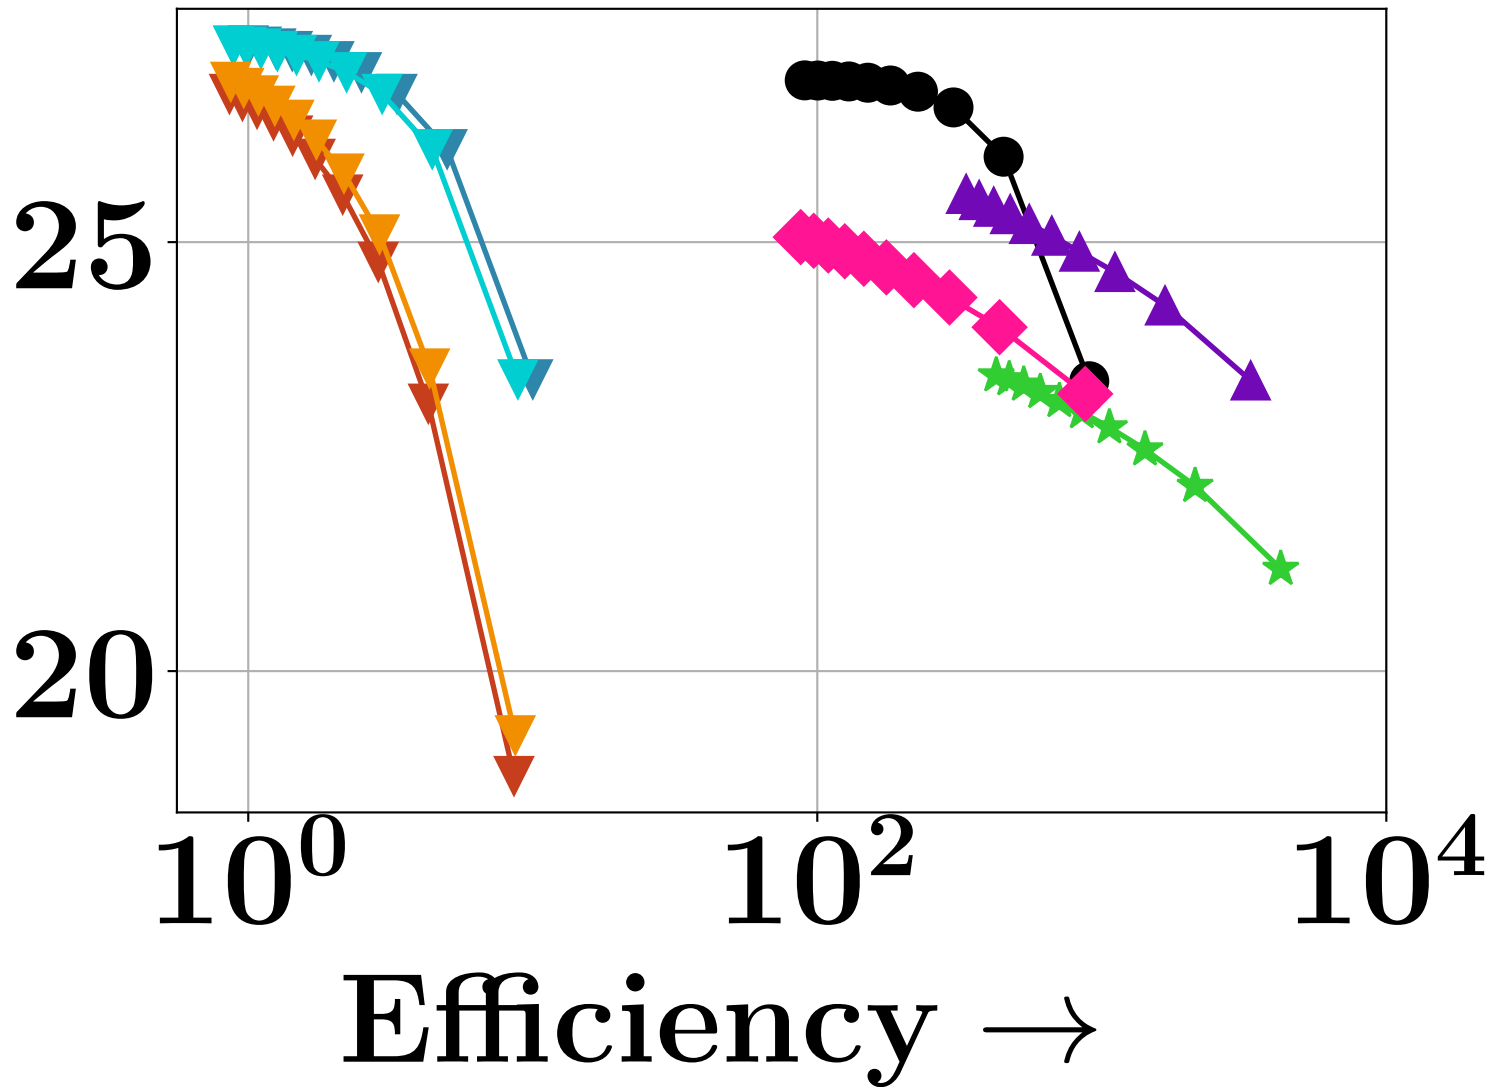

Supplement: supplementary_material [file fever_plot2.pdf › DISCO/notebooks/plots/fever_plot2.pdf]

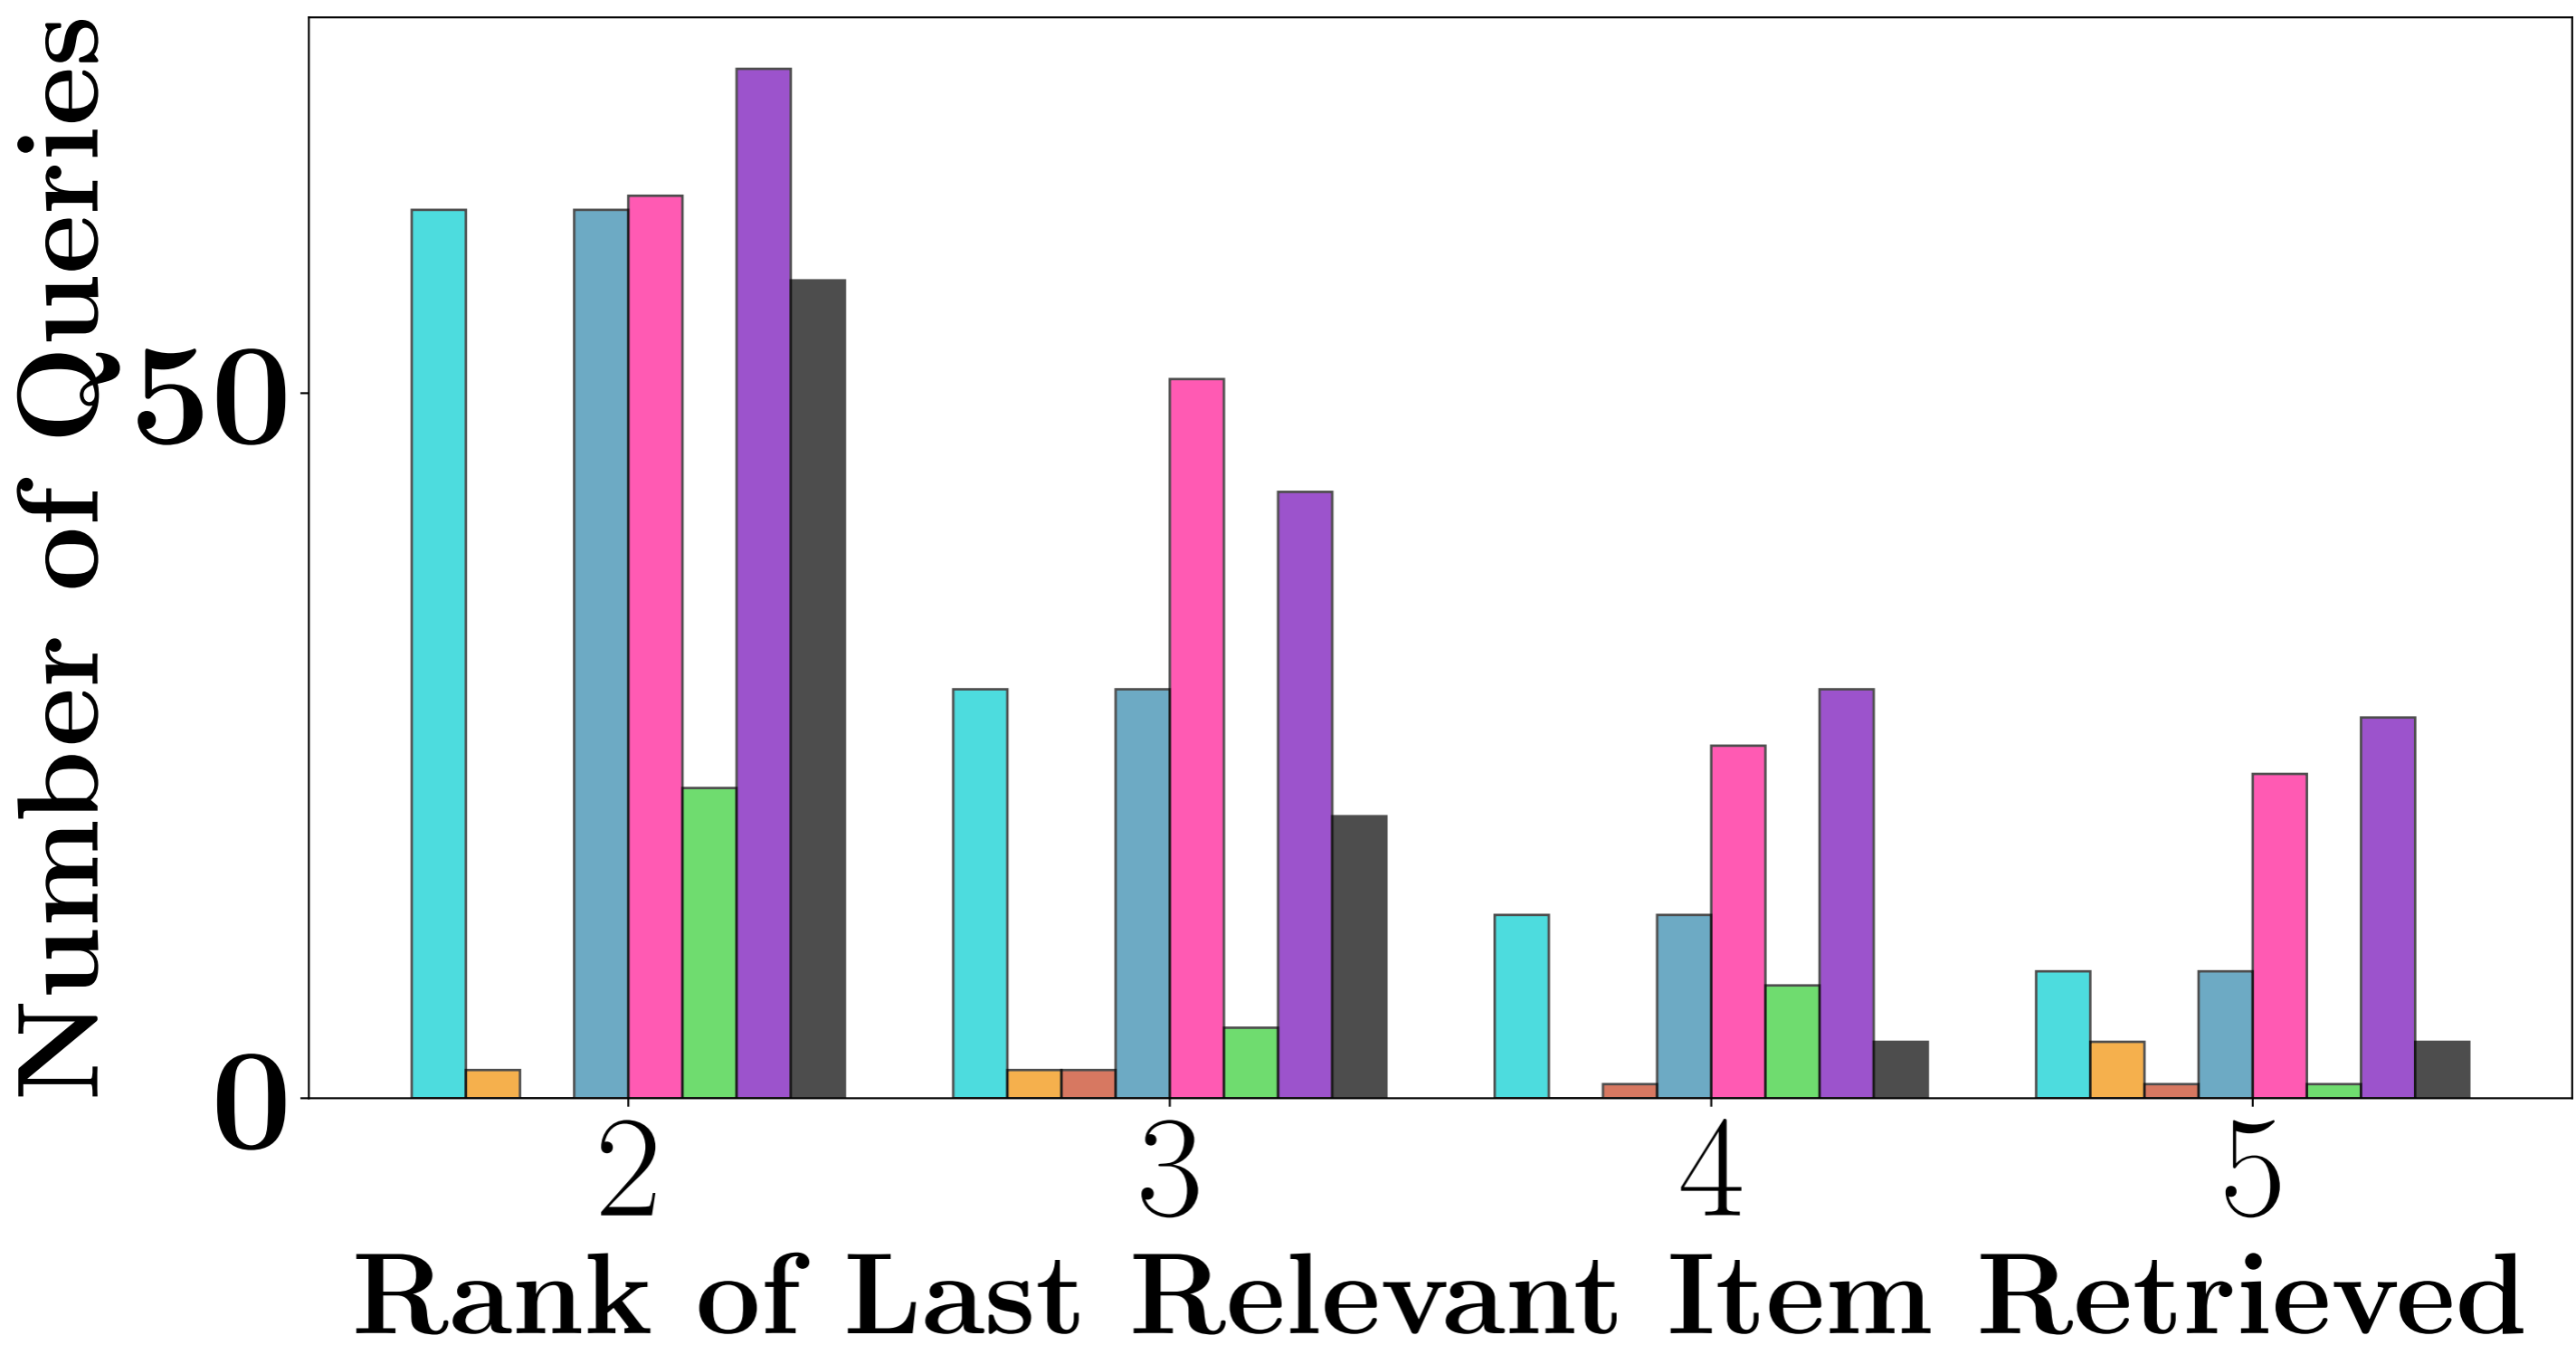

Supplement: supplementary_material [file fever_plot3_5_histogram.pdf › DISCO/notebooks/plots/fever_plot3_5_histogram.pdf]

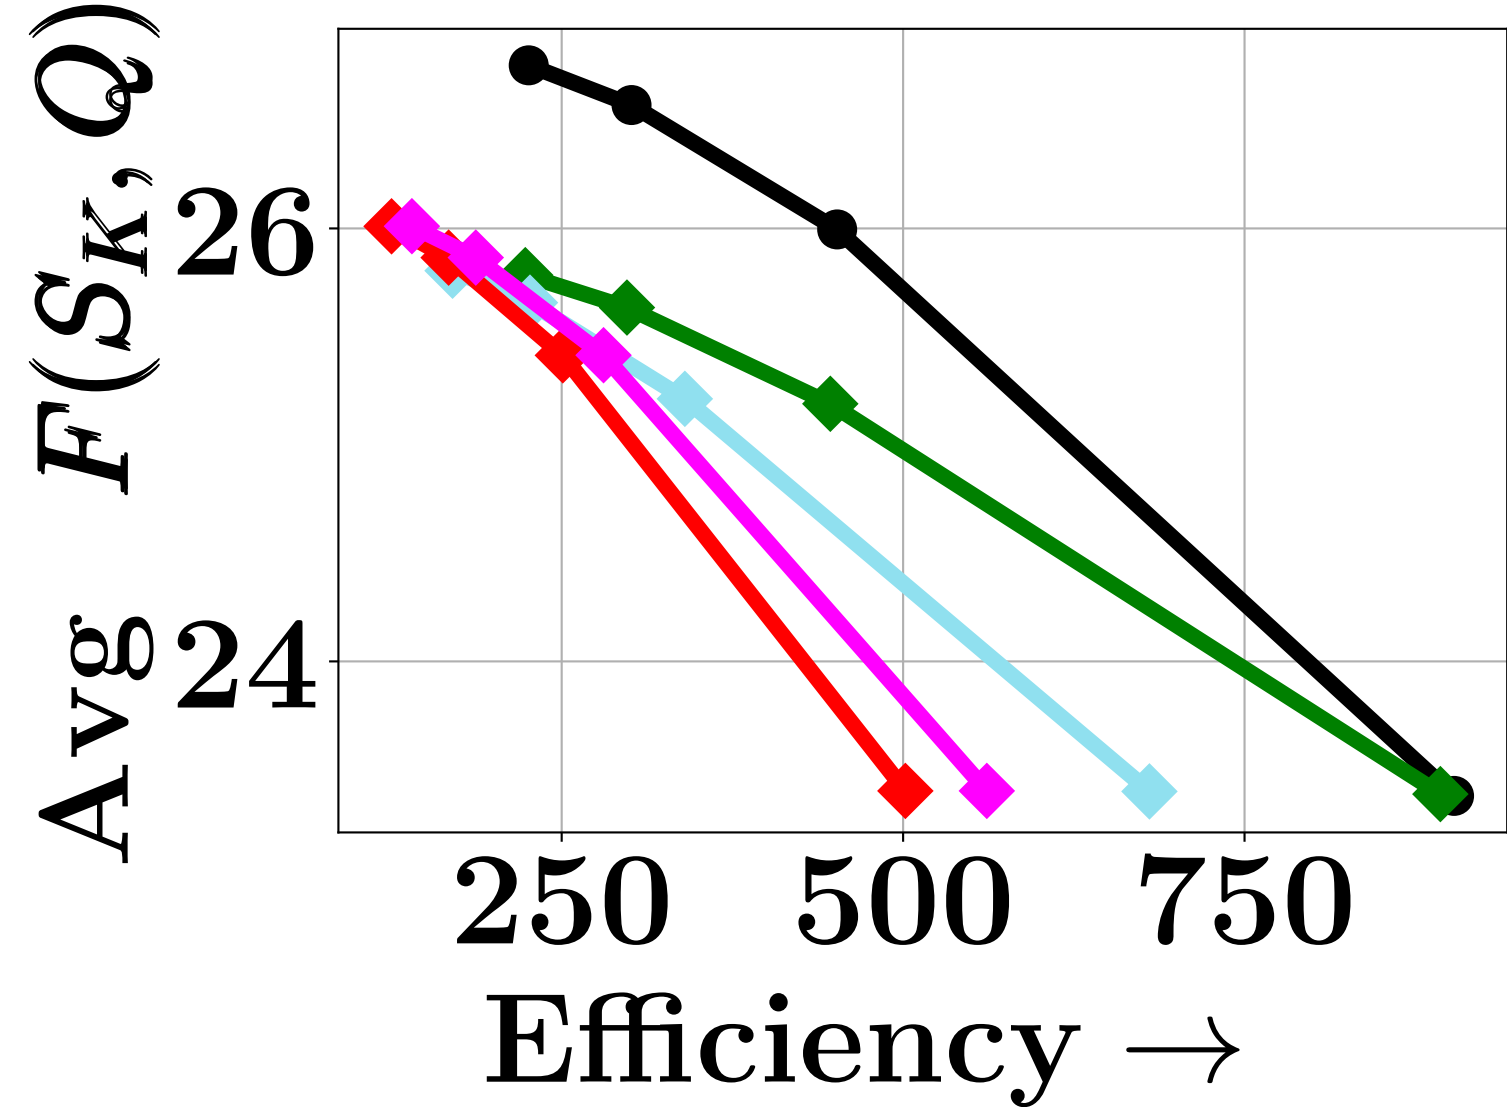

Supplement: supplementary_material [file fever_plot_4_1.pdf › DISCO/notebooks/plots/fever_plot_4_1.pdf]

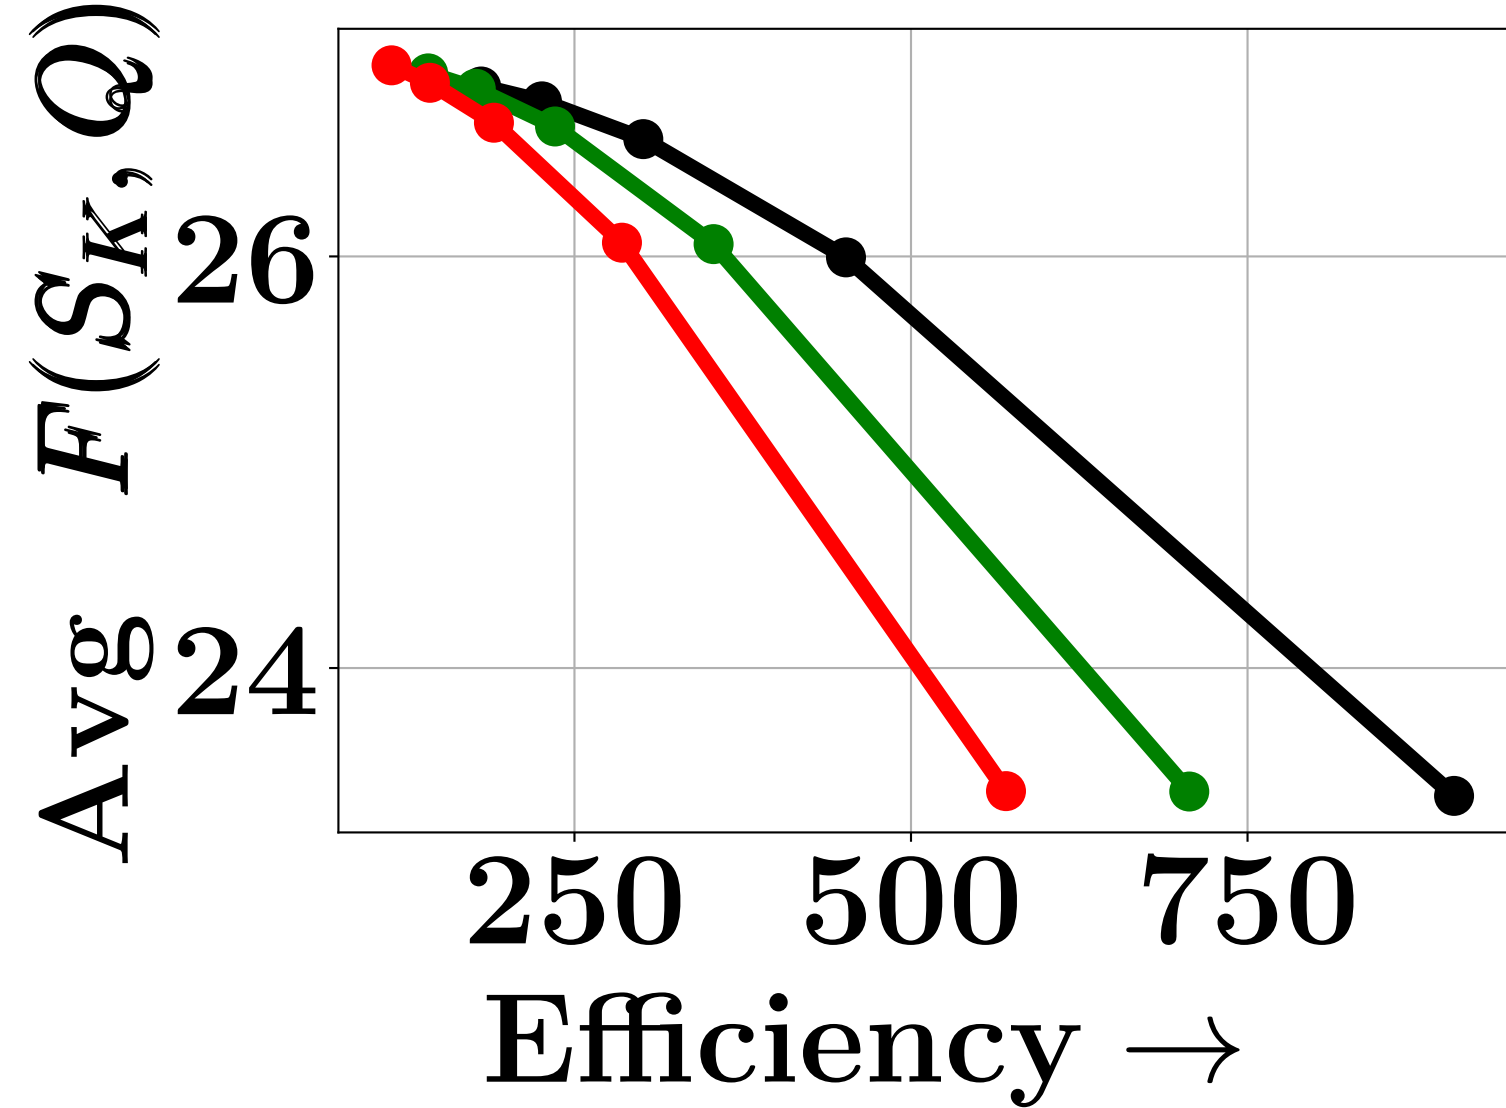

Supplement: supplementary_material [file fever_plot_4_2.pdf › DISCO/notebooks/plots/fever_plot_4_2.pdf]

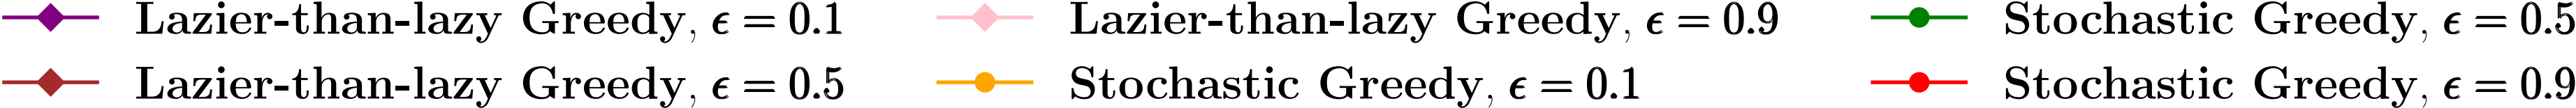

Supplement: supplementary_material [file greedy_supp_legend.pdf › DISCO/notebooks/plots/greedy_supp_legend.pdf]

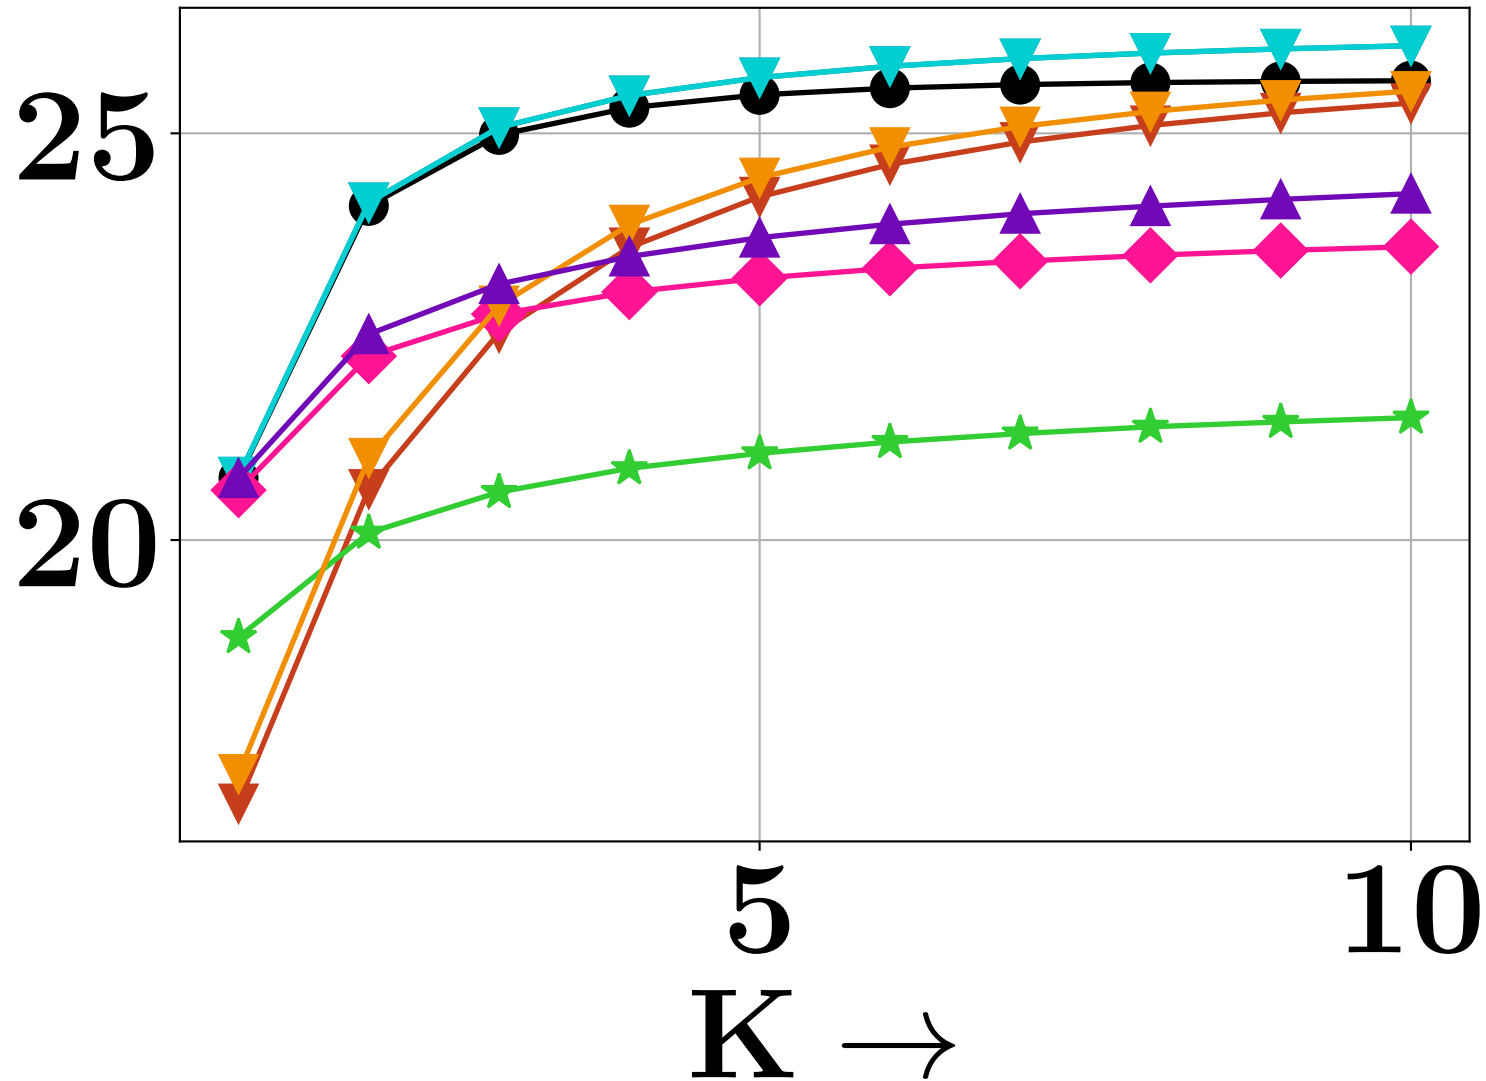

Supplement: supplementary_material [file hotpotqa_covK_supp.pdf › DISCO/notebooks/plots/hotpotqa_covK_supp.pdf]

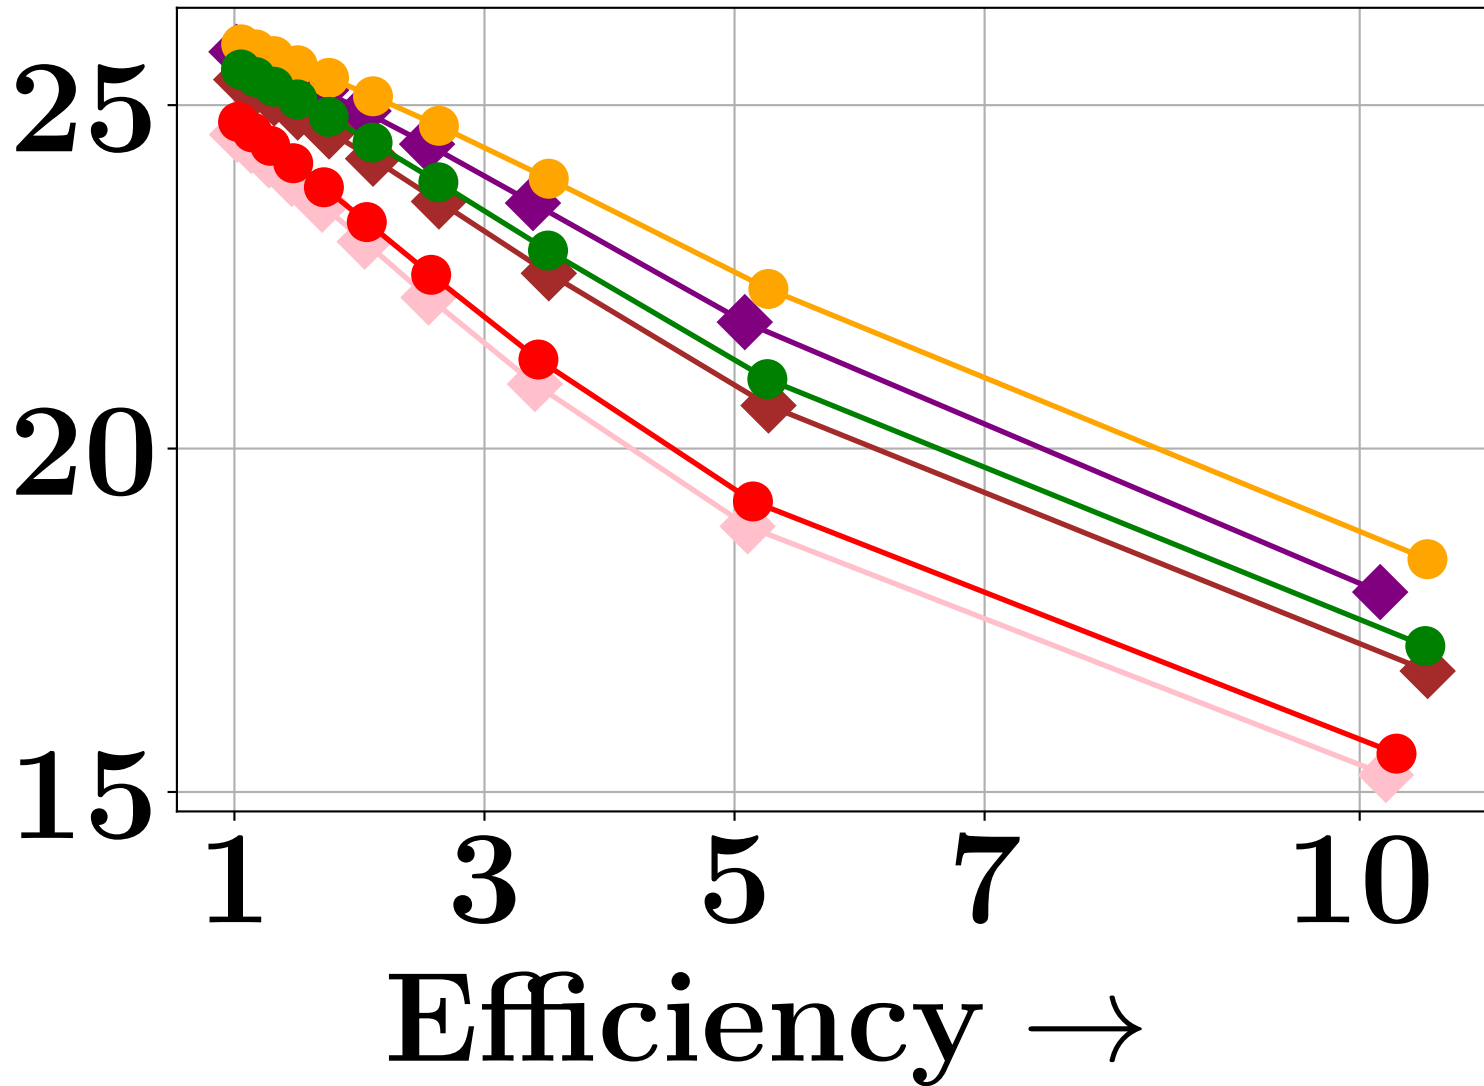

Supplement: supplementary_material [file hotpotqa_greedy_supp.pdf › DISCO/notebooks/plots/hotpotqa_greedy_supp.pdf]

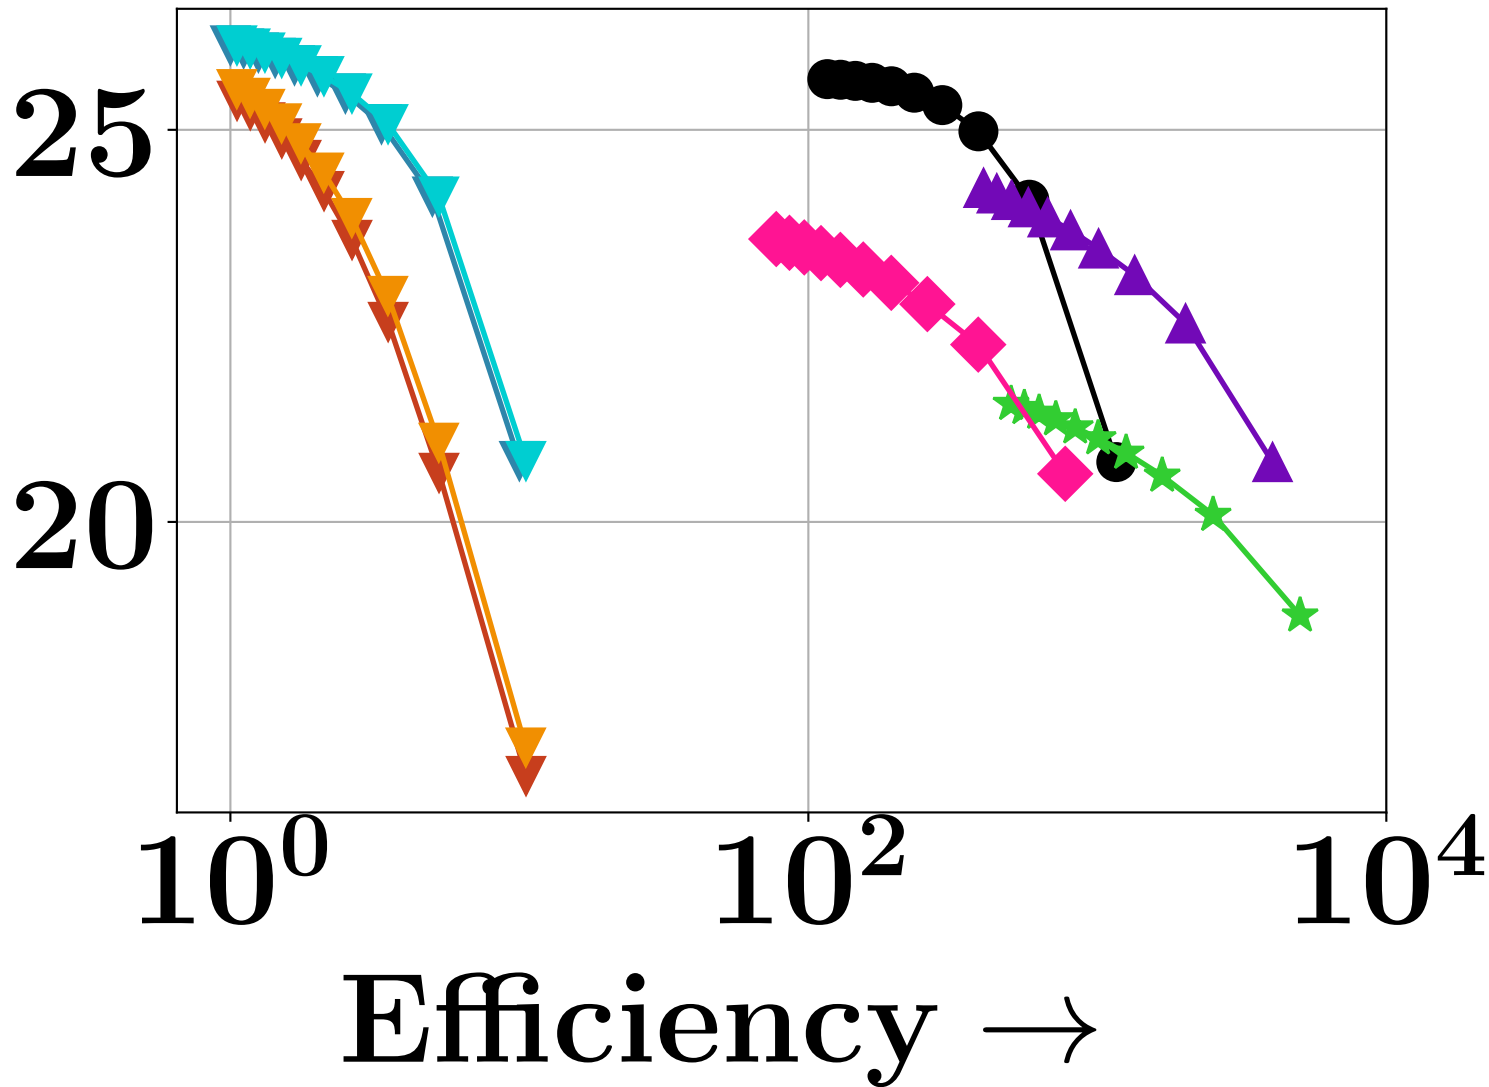

Supplement: supplementary_material [file hotpotqa_plot2.pdf › DISCO/notebooks/plots/hotpotqa_plot2.pdf]

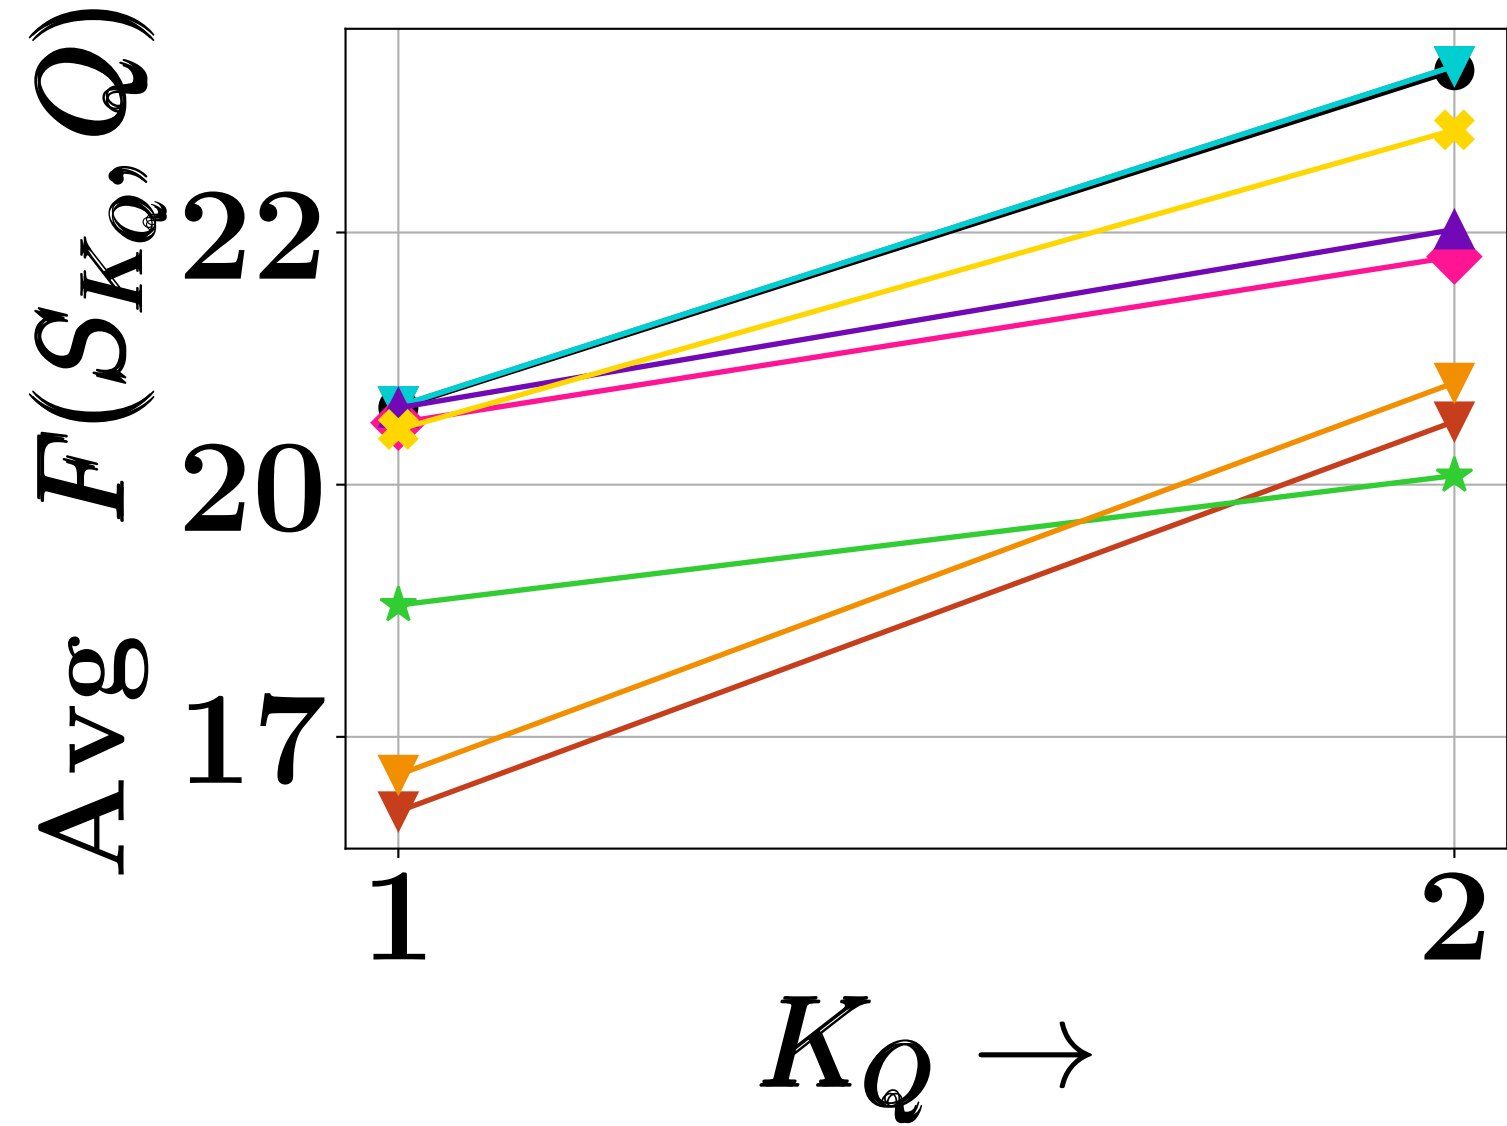

Supplement: supplementary_material [file hotpotqa_plot3_5_1.pdf › DISCO/notebooks/plots/hotpotqa_plot3_5_1.pdf]

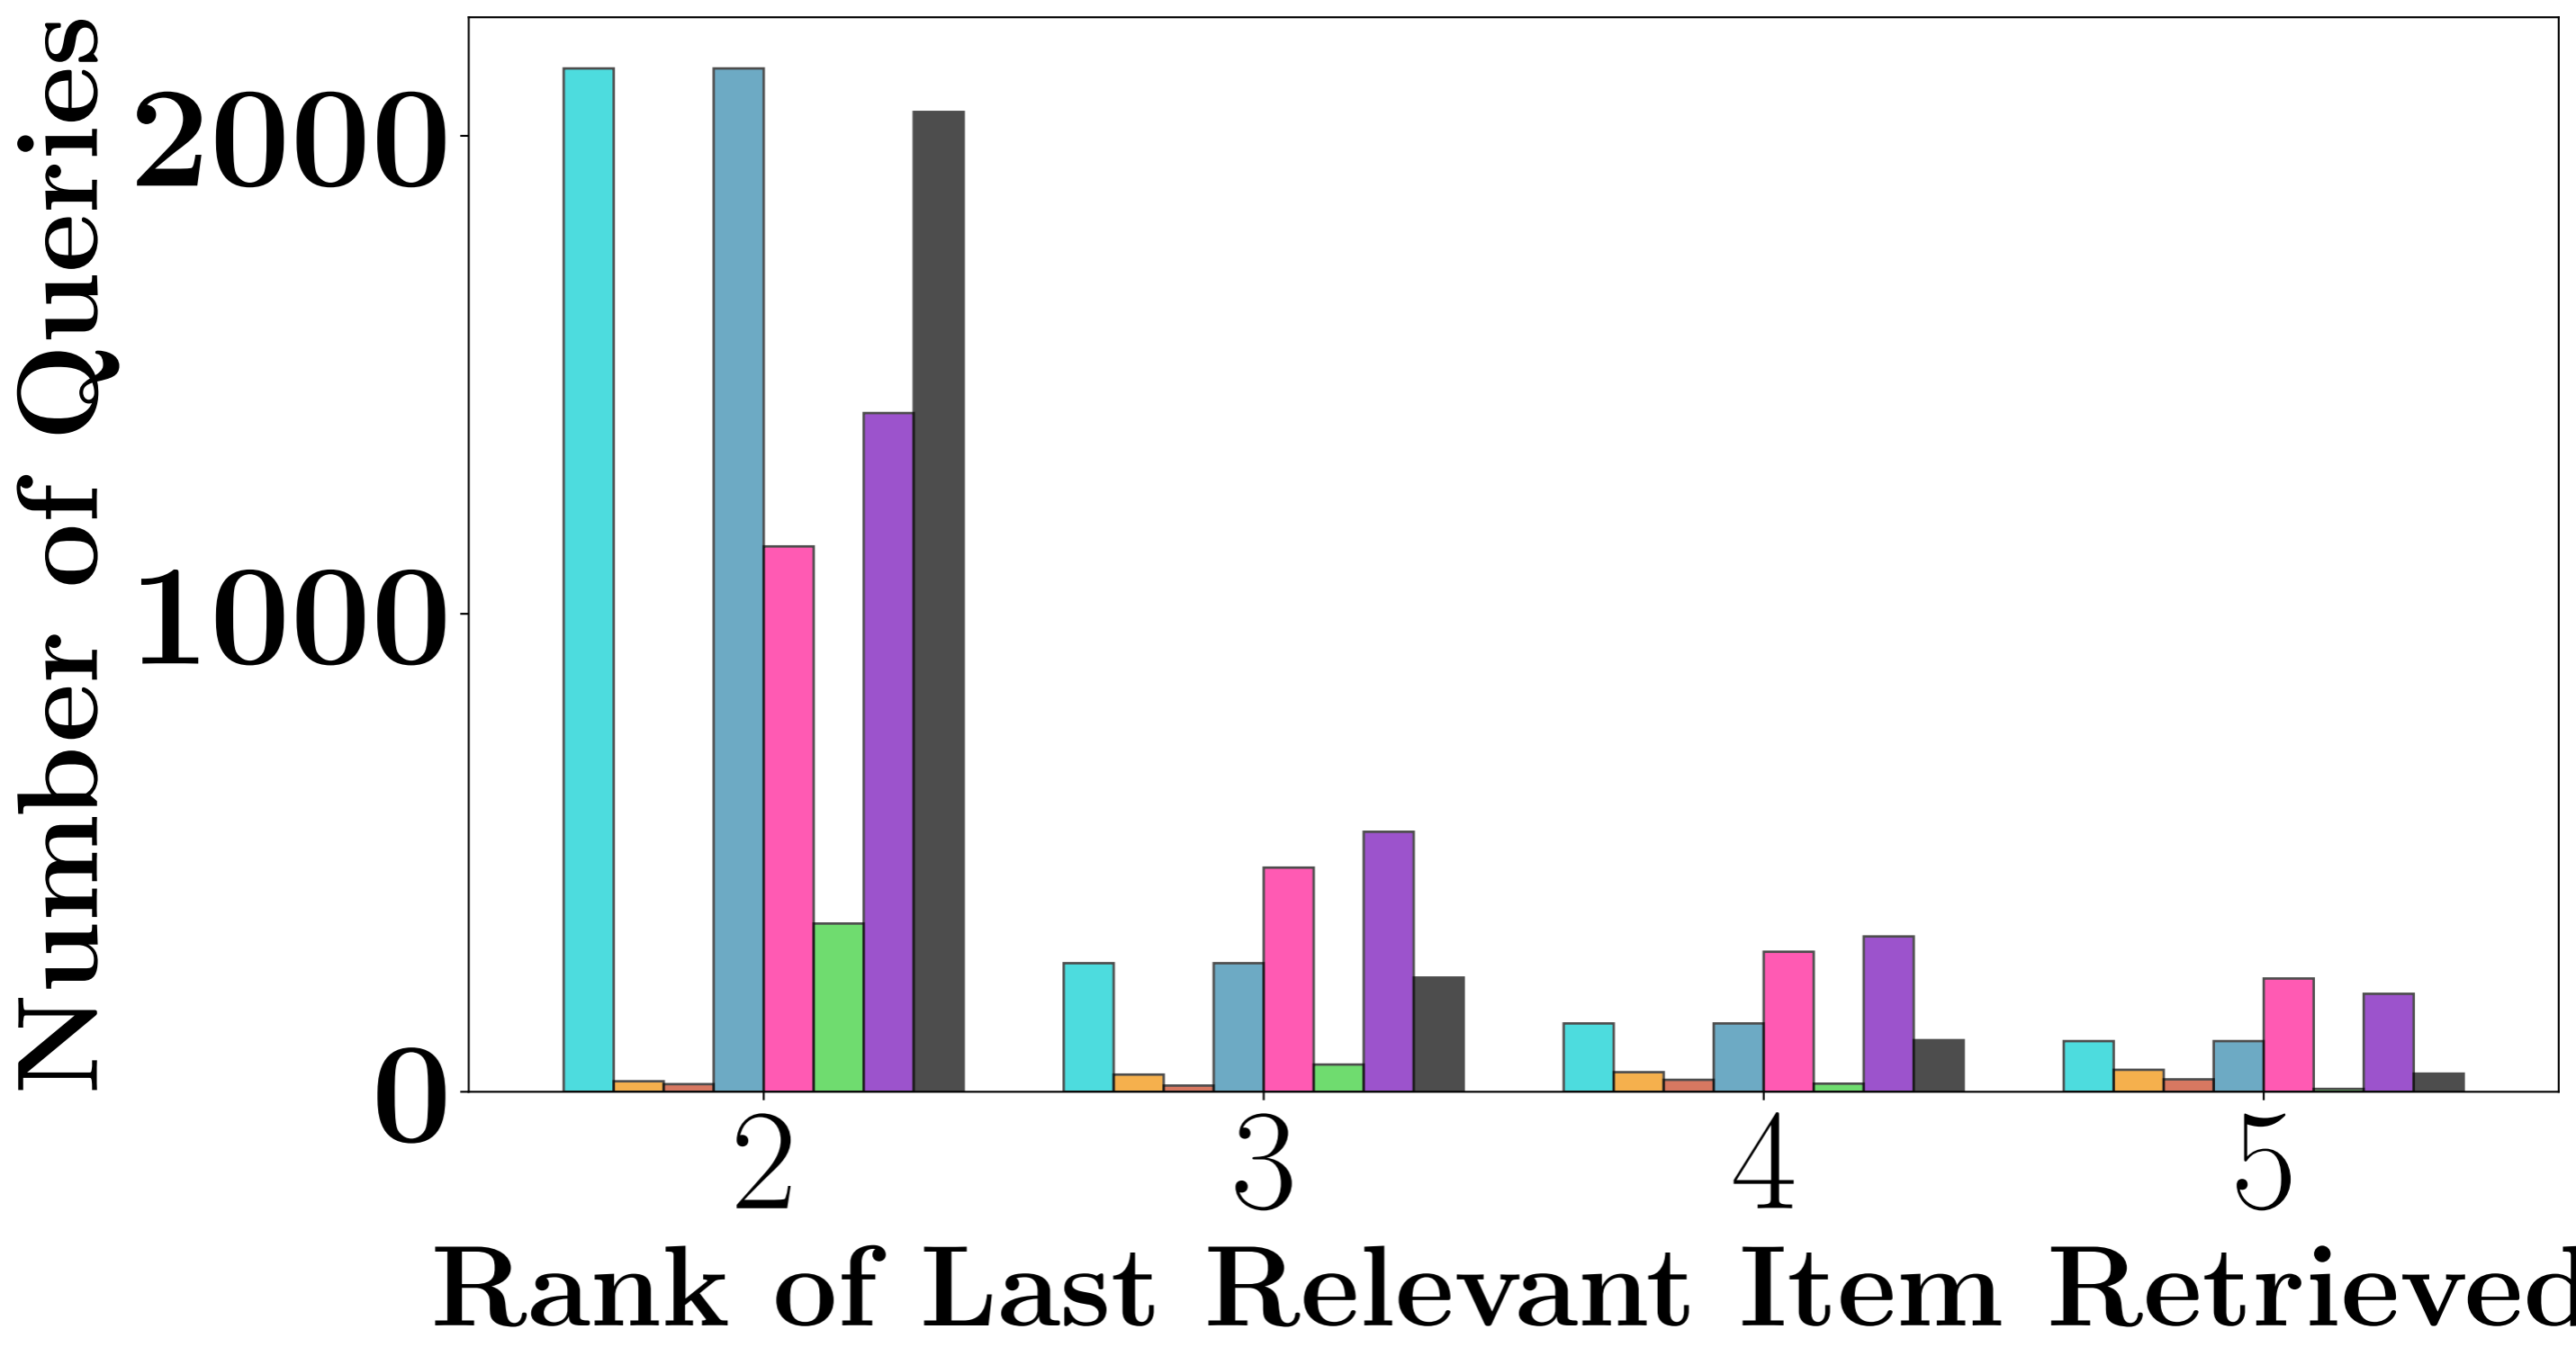

Supplement: supplementary_material [file hotpotqa_plot3_5_histogram.pdf › DISCO/notebooks/plots/hotpotqa_plot3_5_histogram.pdf]

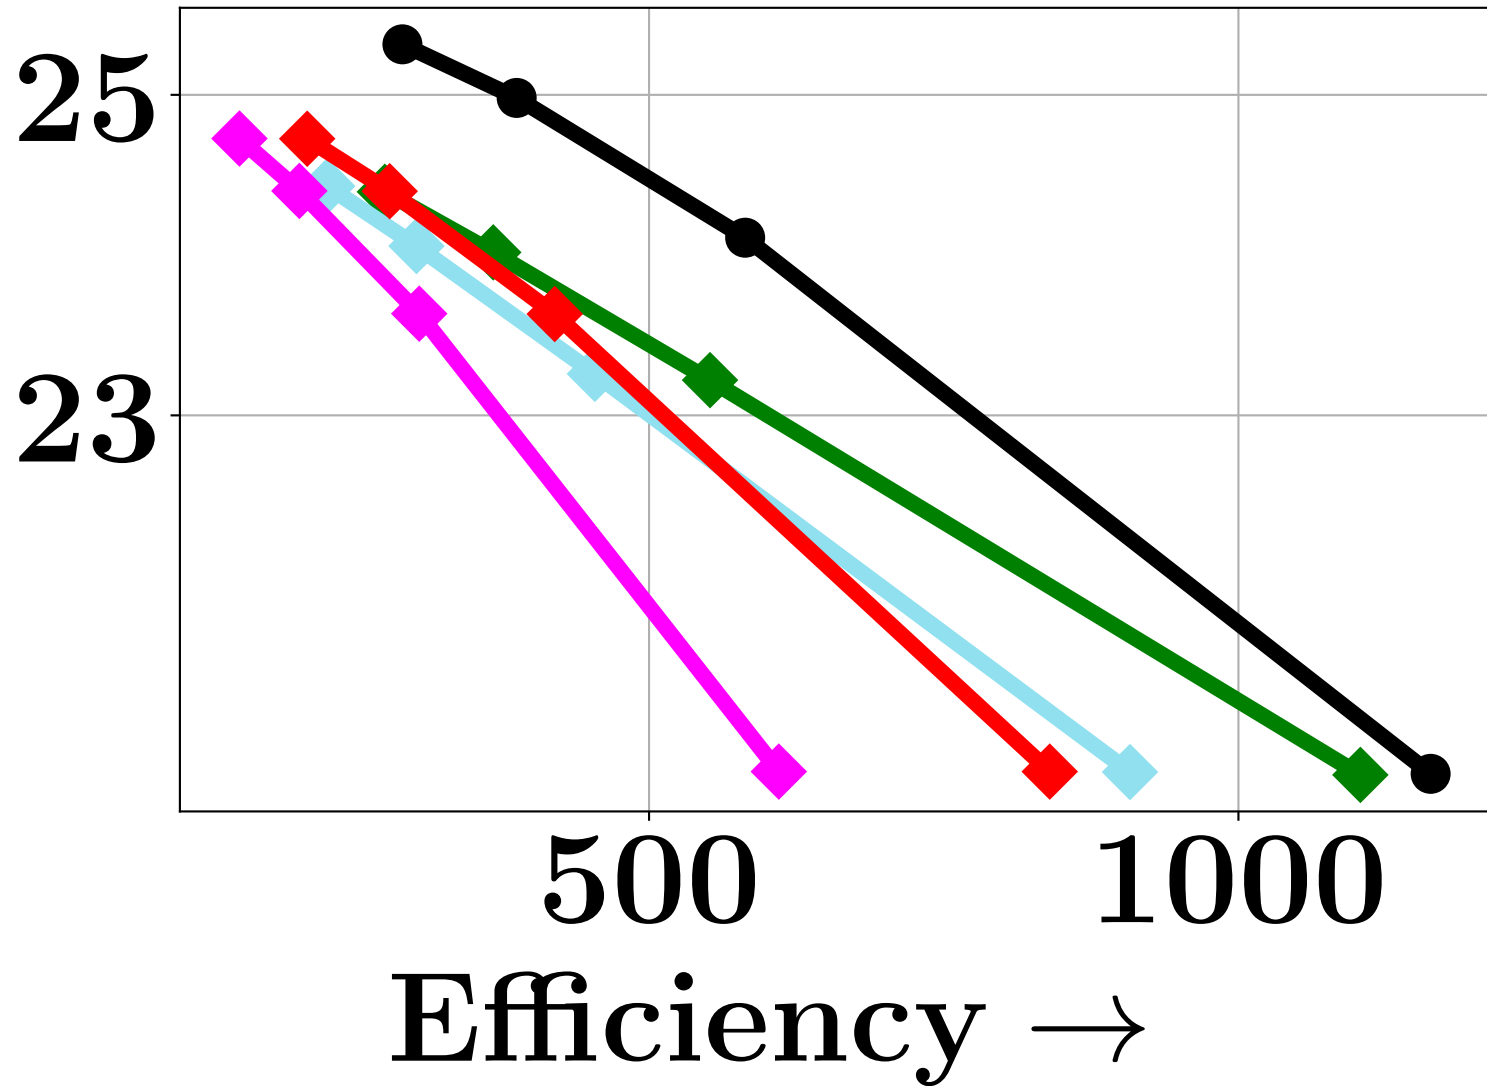

Supplement: supplementary_material [file hotpotqa_plot_4_1.pdf › DISCO/notebooks/plots/hotpotqa_plot_4_1.pdf]

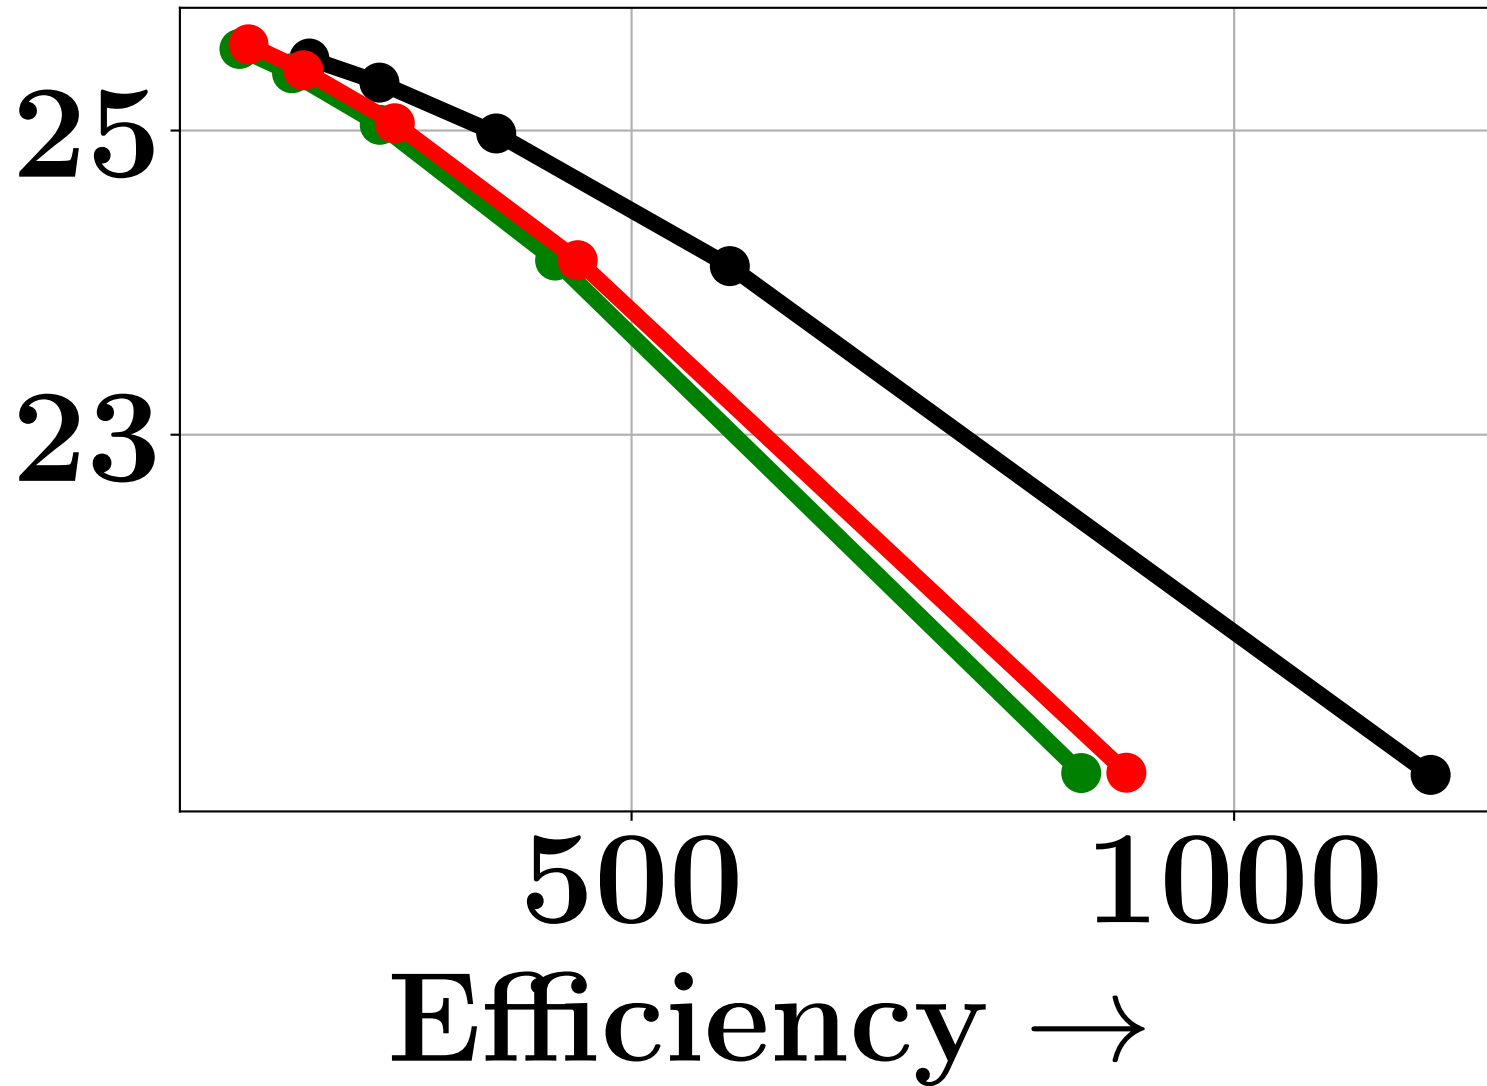

Supplement: supplementary_material [file hotpotqa_plot_4_2.pdf › DISCO/notebooks/plots/hotpotqa_plot_4_2.pdf]

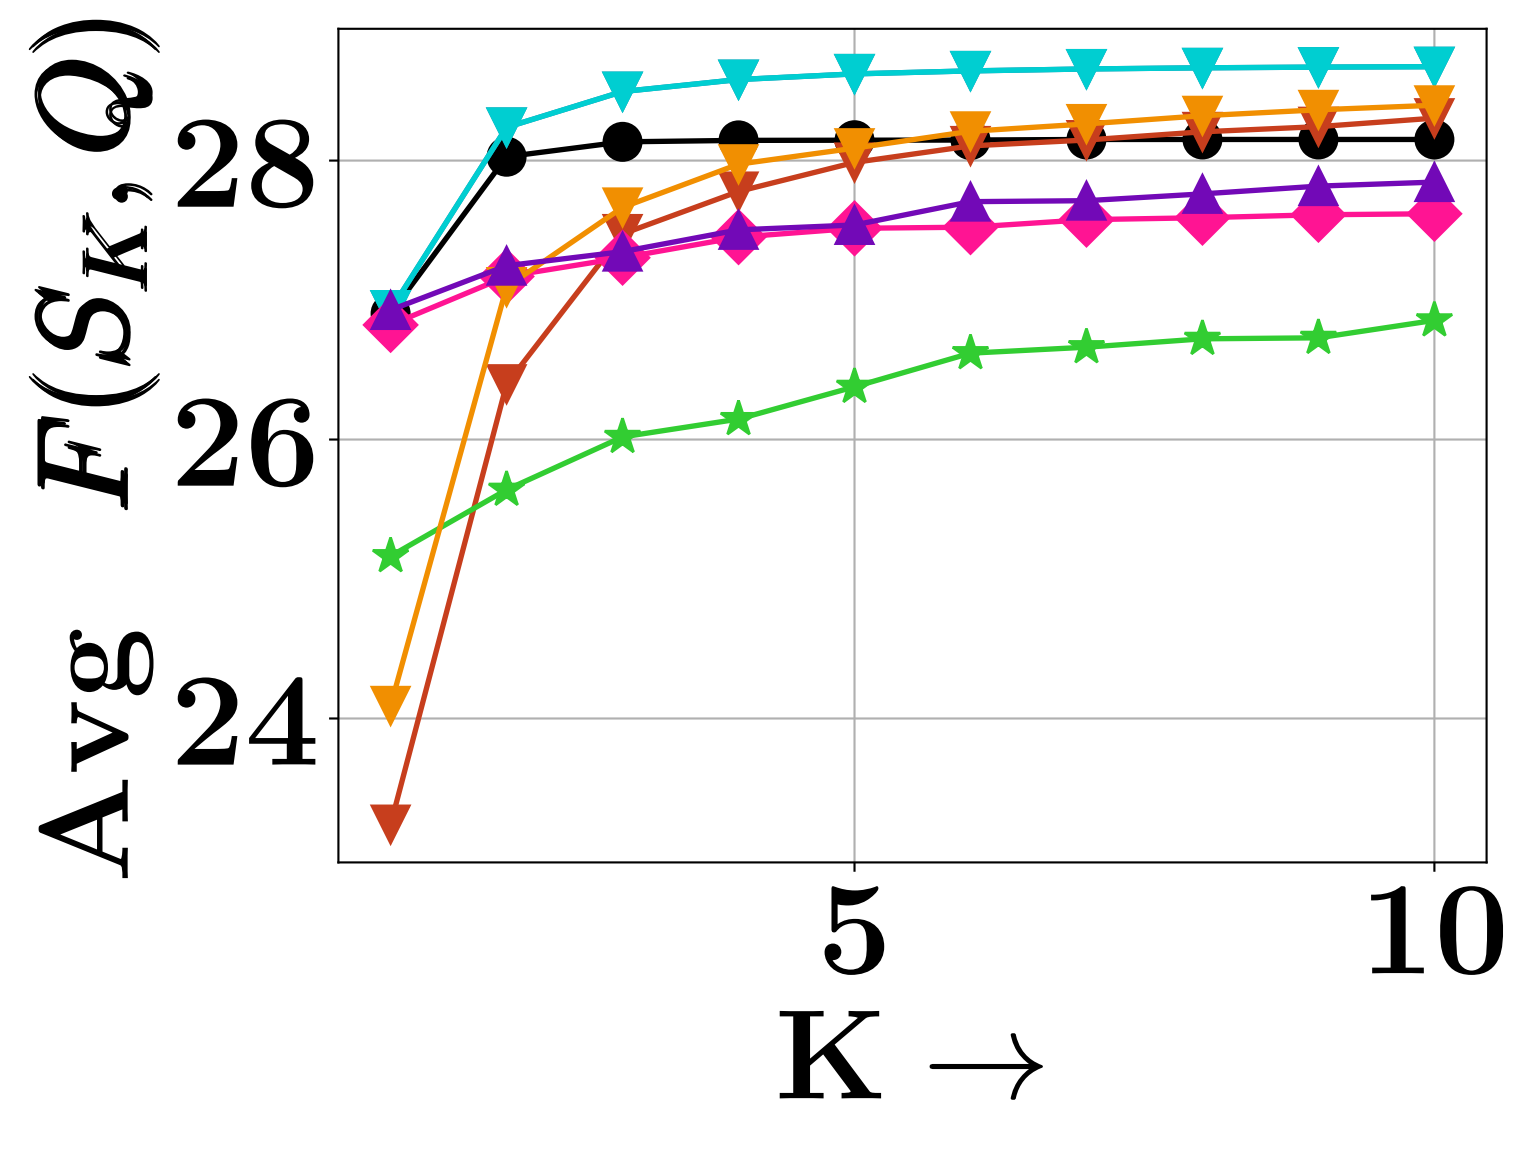

Supplement: supplementary_material [file msmarco_covK_supp.pdf › DISCO/notebooks/plots/msmarco_covK_supp.pdf]

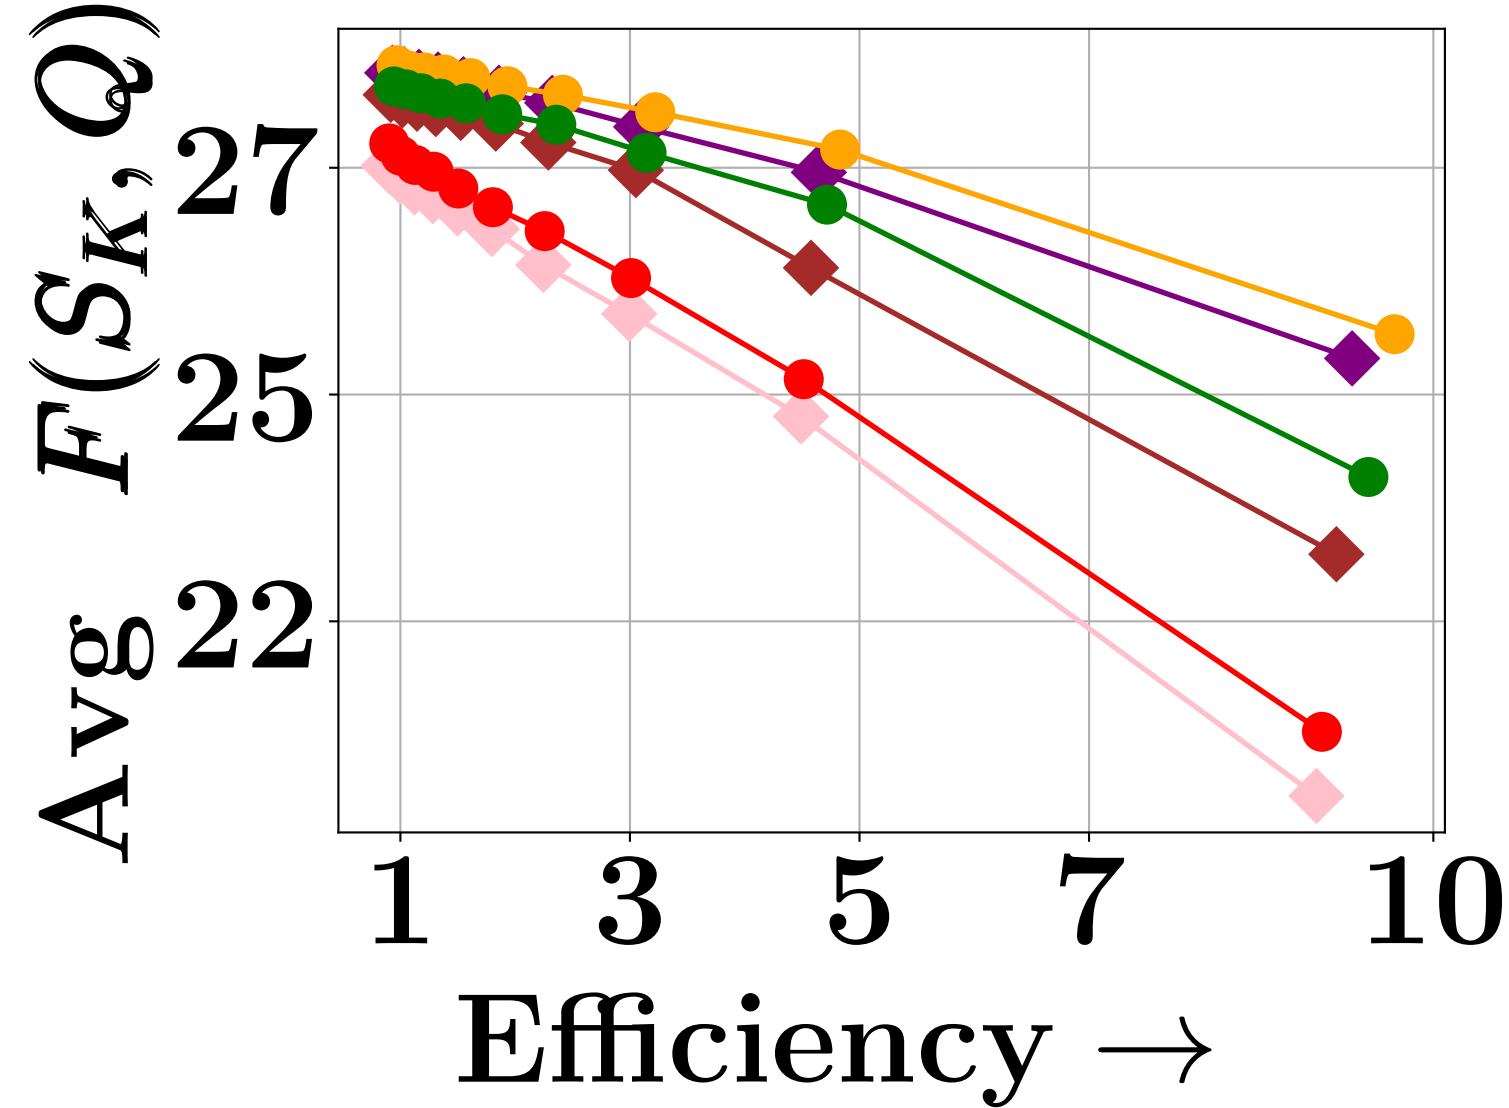

Supplement: supplementary_material [file msmarco_greedy_supp.pdf › DISCO/notebooks/plots/msmarco_greedy_supp.pdf]

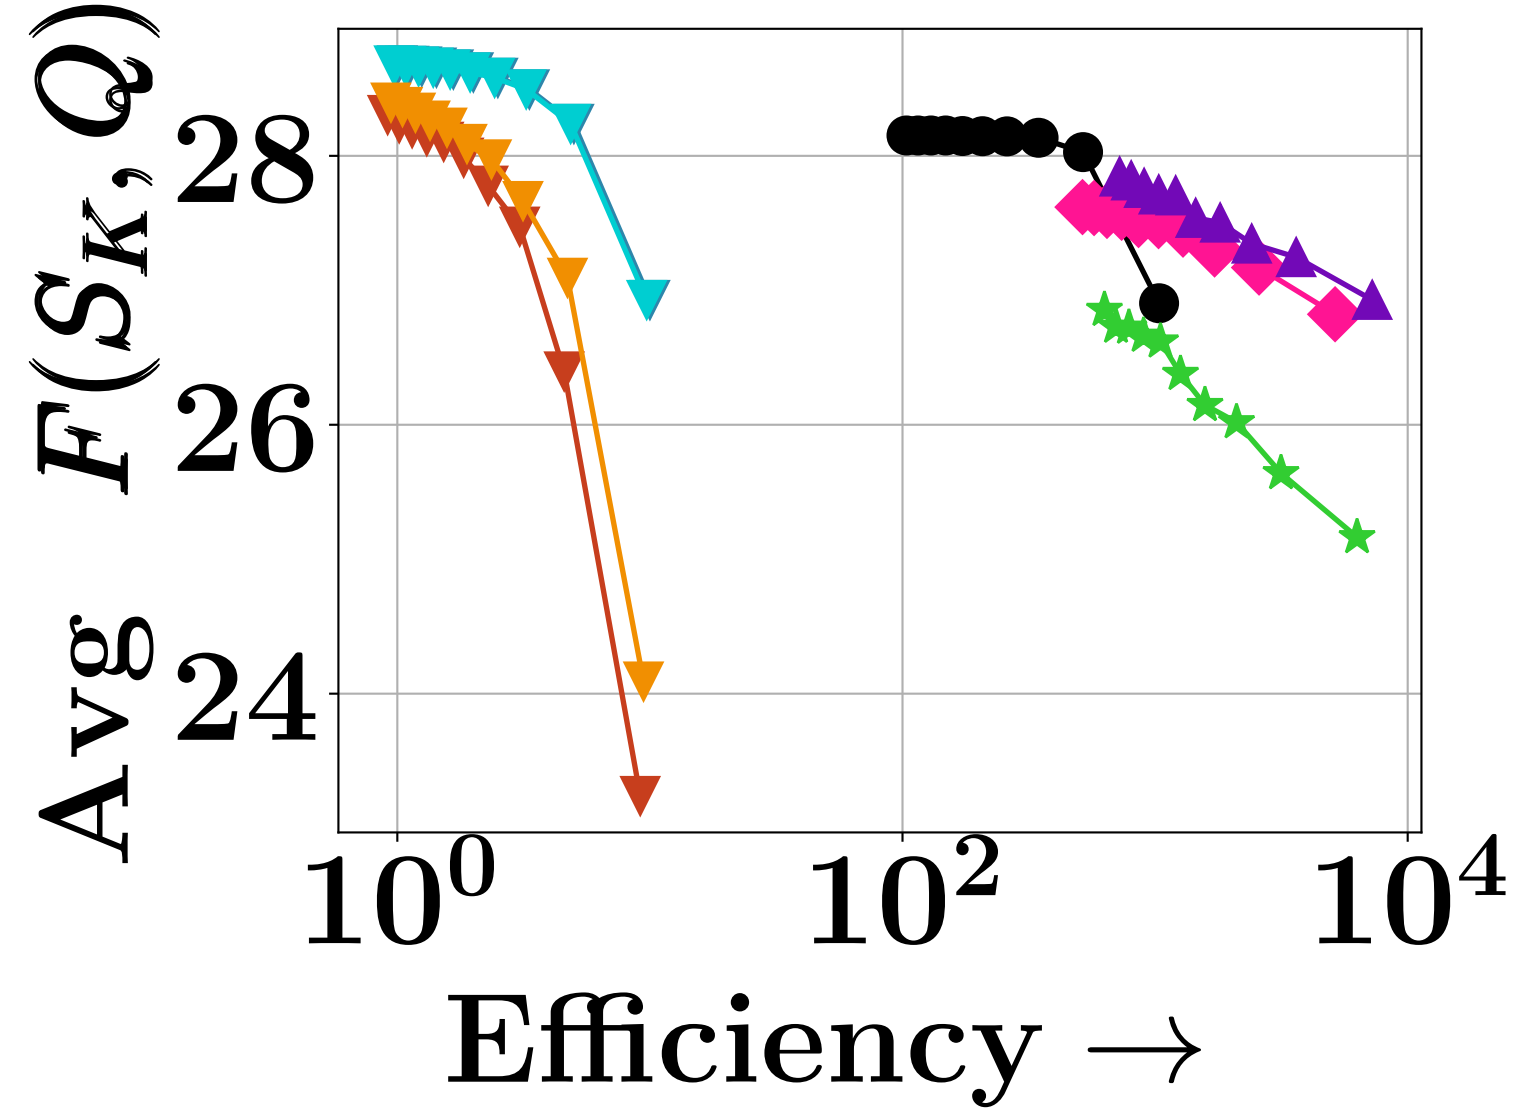

Supplement: supplementary_material [file msmarco_plot2.pdf › DISCO/notebooks/plots/msmarco_plot2.pdf]

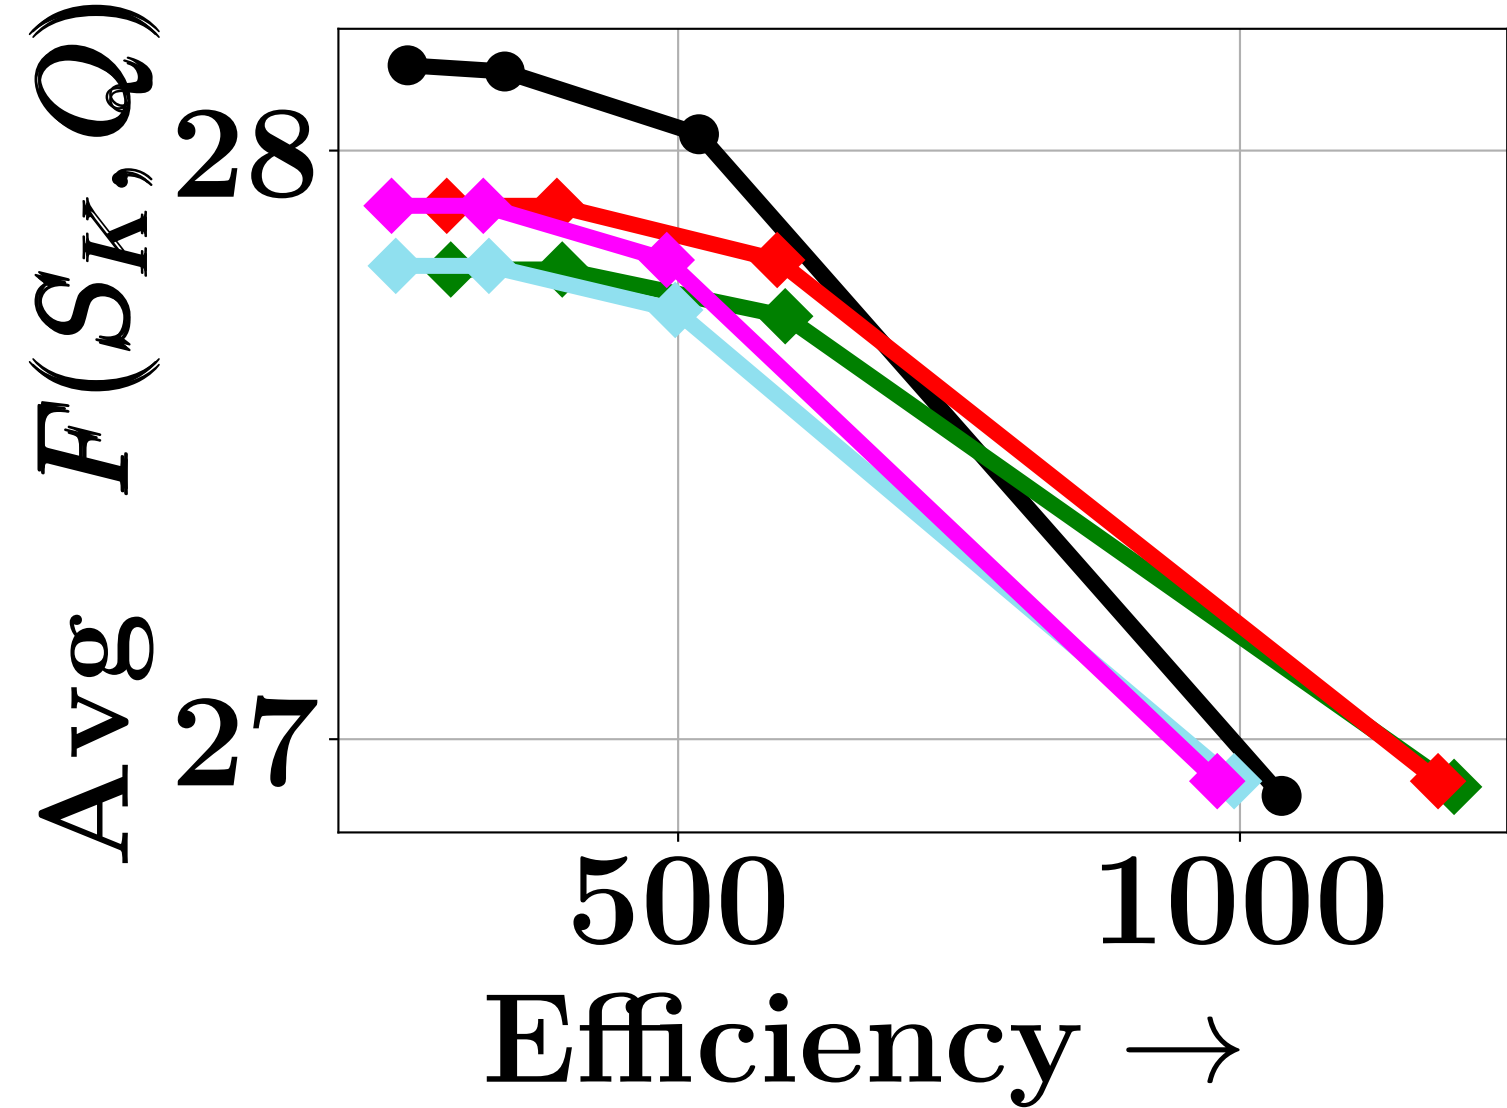

Supplement: supplementary_material [file msmarco_plot_4_1.pdf › DISCO/notebooks/plots/msmarco_plot_4_1.pdf]

28

27

500

1000

Efficiency  $\rightarrow$

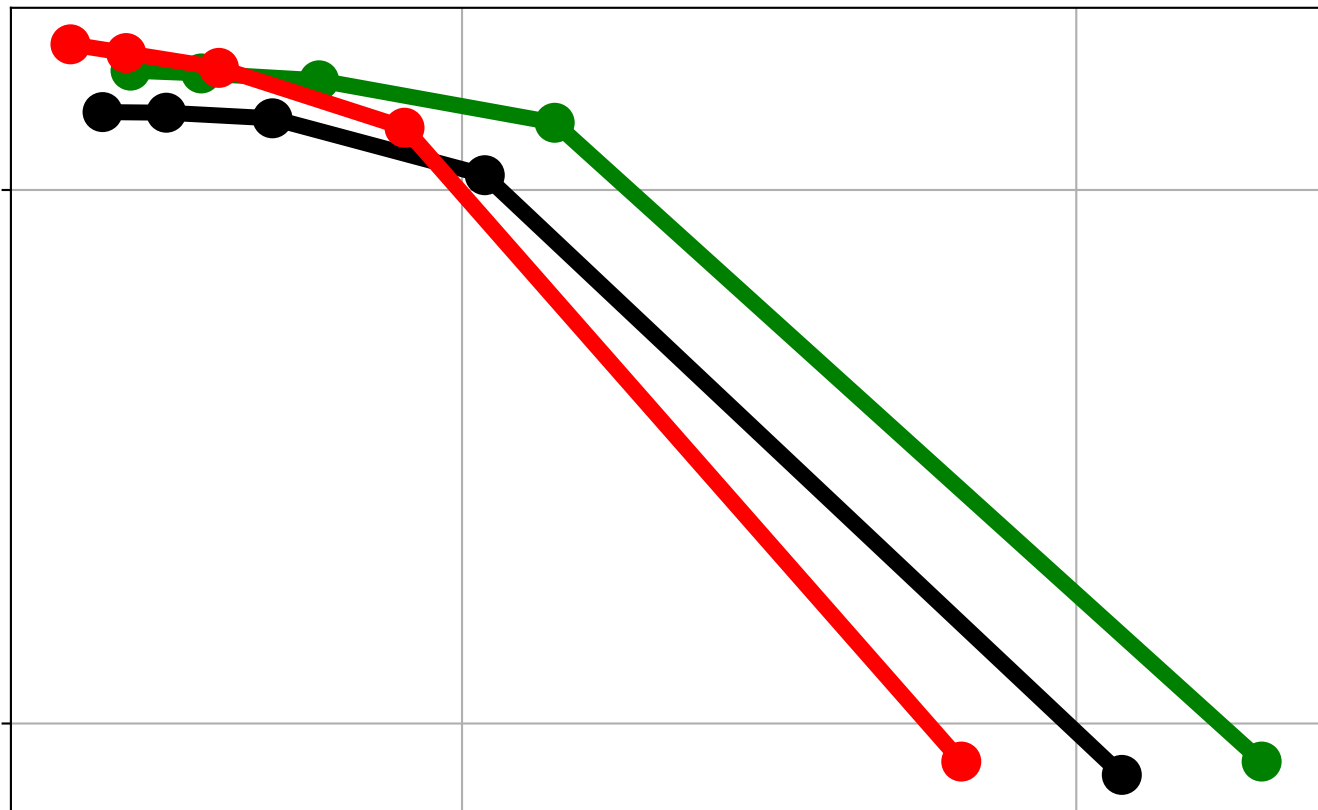

Supplement: supplementary_material [file msmarco_plot_4_2.pdf › DISCO/notebooks/plots/msmarco_plot_4_2.pdf]

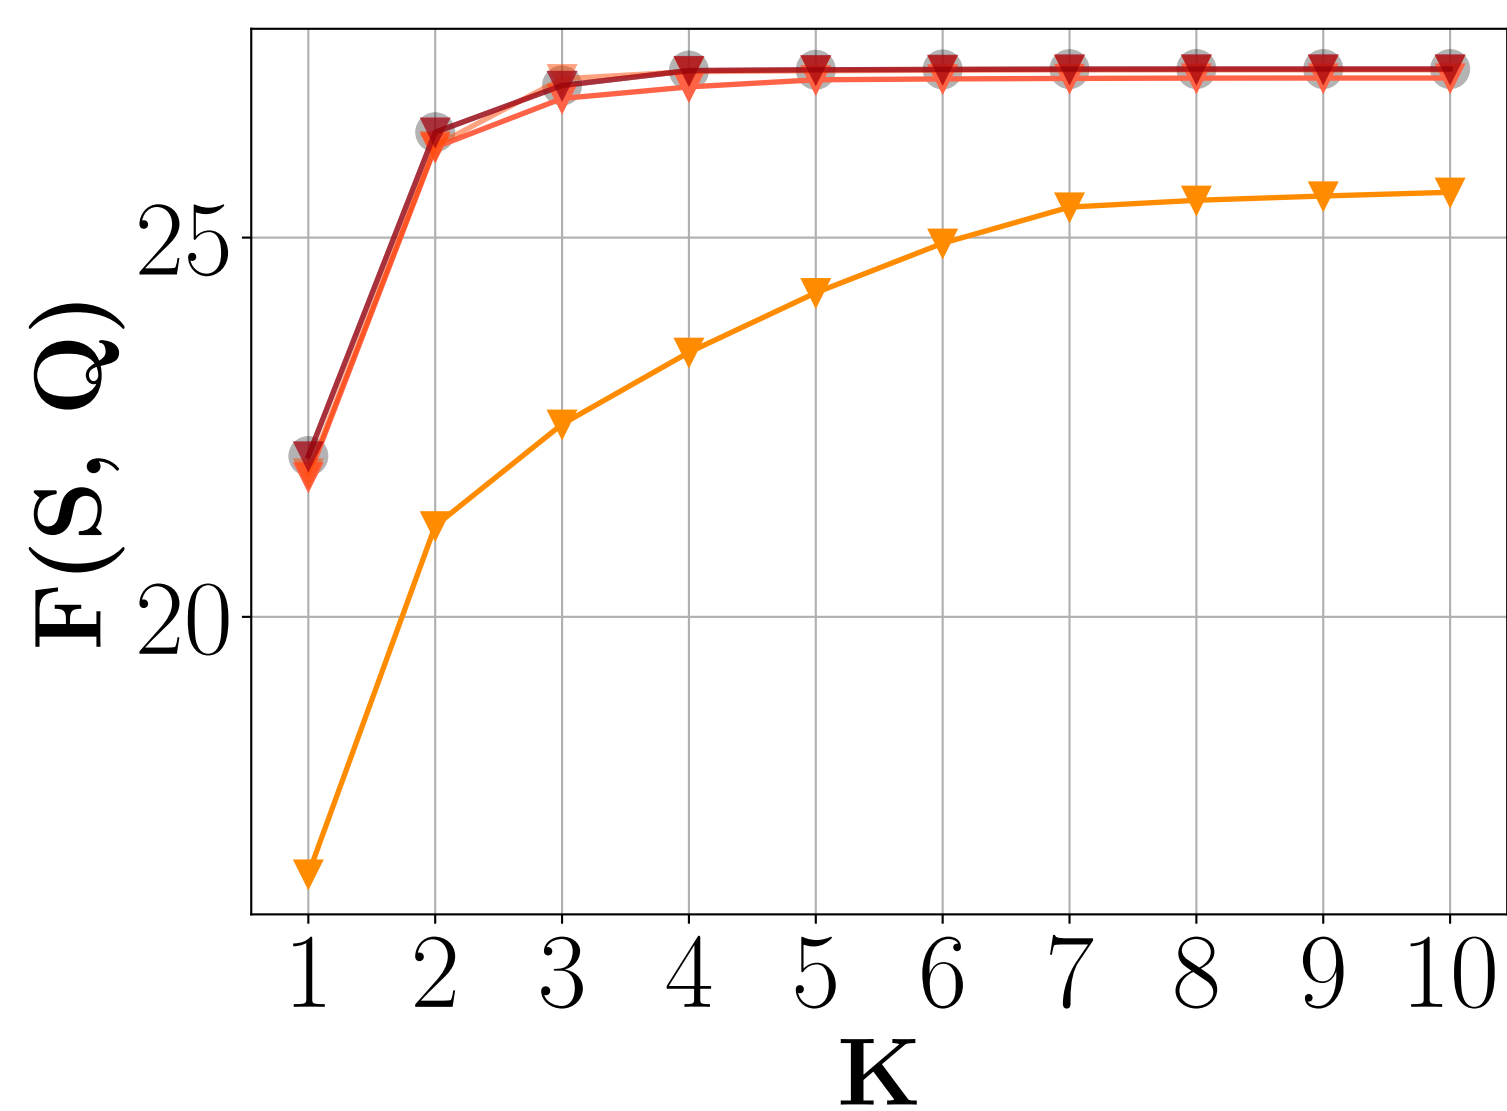

Supplement: supplementary_material [file nfcorpus_f_s_vs_k.pdf › DISCO/notebooks/plots/nfcorpus_f_s_vs_k.pdf]

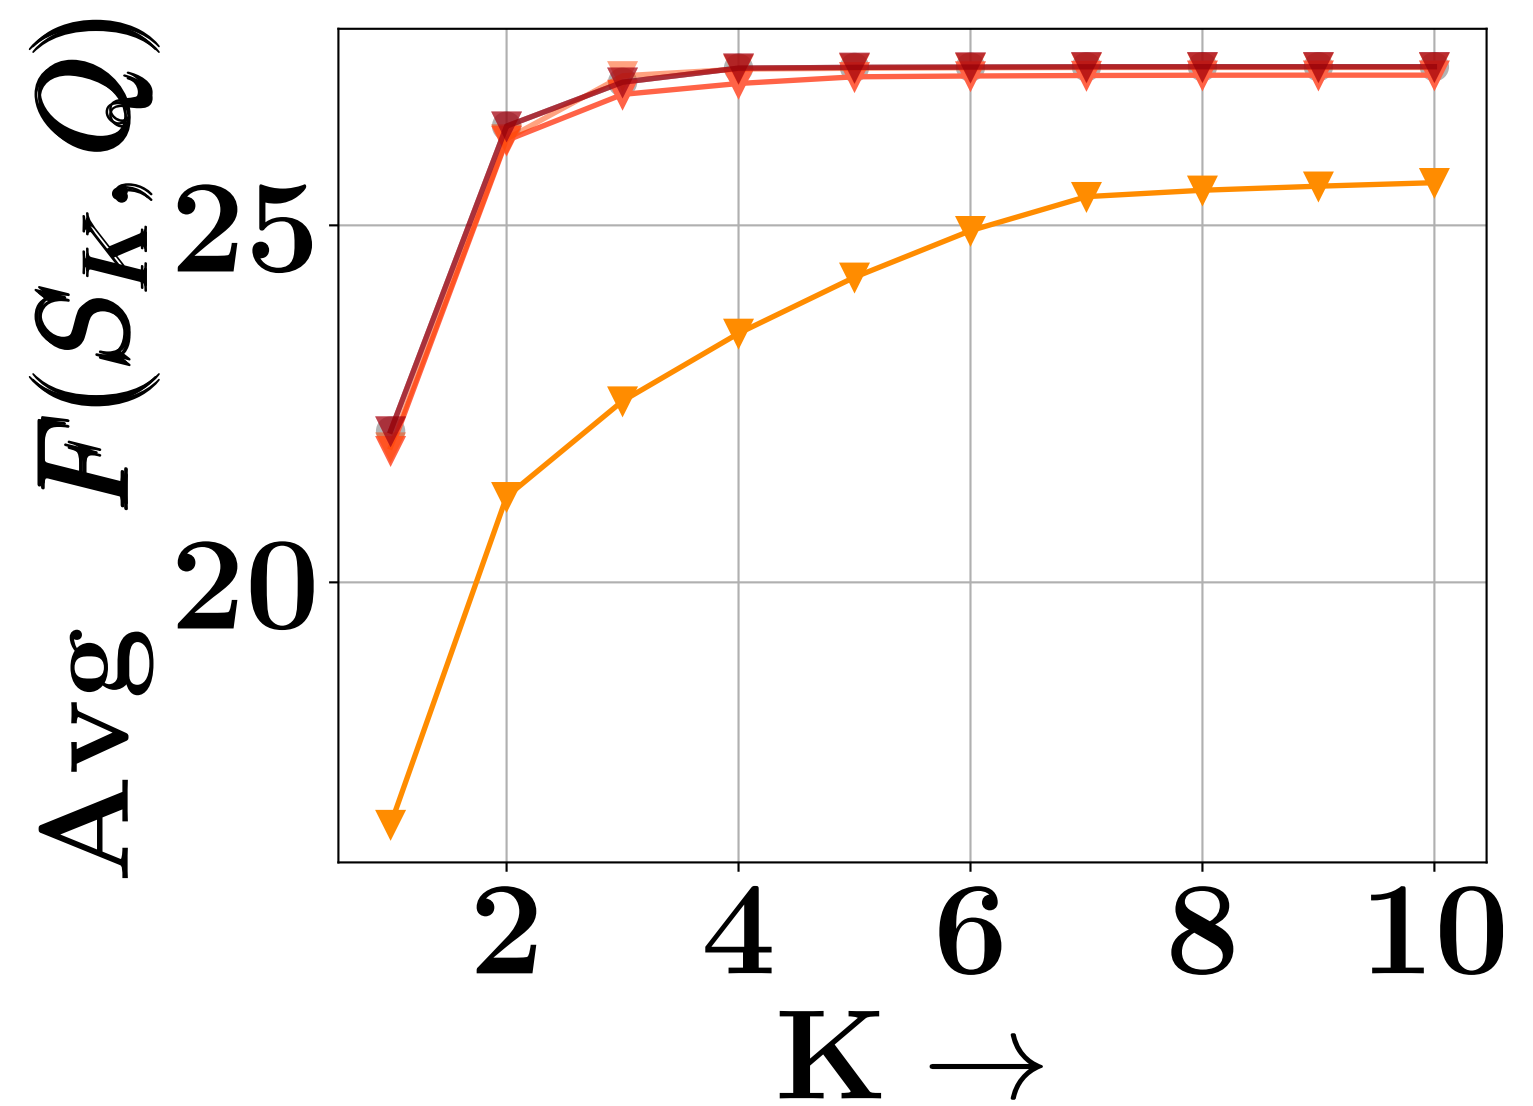

Supplement: supplementary_material [file nfcorpus_plot1.pdf › DISCO/notebooks/plots/nfcorpus_plot1.pdf]

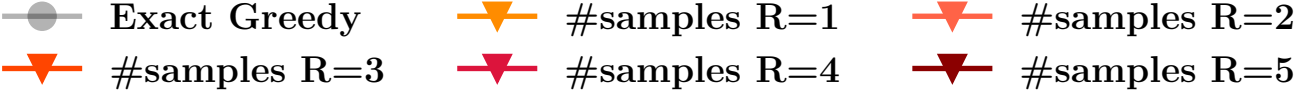

Supplement: supplementary_material [file plot1_legend.pdf › DISCO/notebooks/plots/plot1_legend.pdf]



Supplement: supplementary_material [file plot2_legend.pdf › DISCO/notebooks/plots/plot2_legend.pdf]

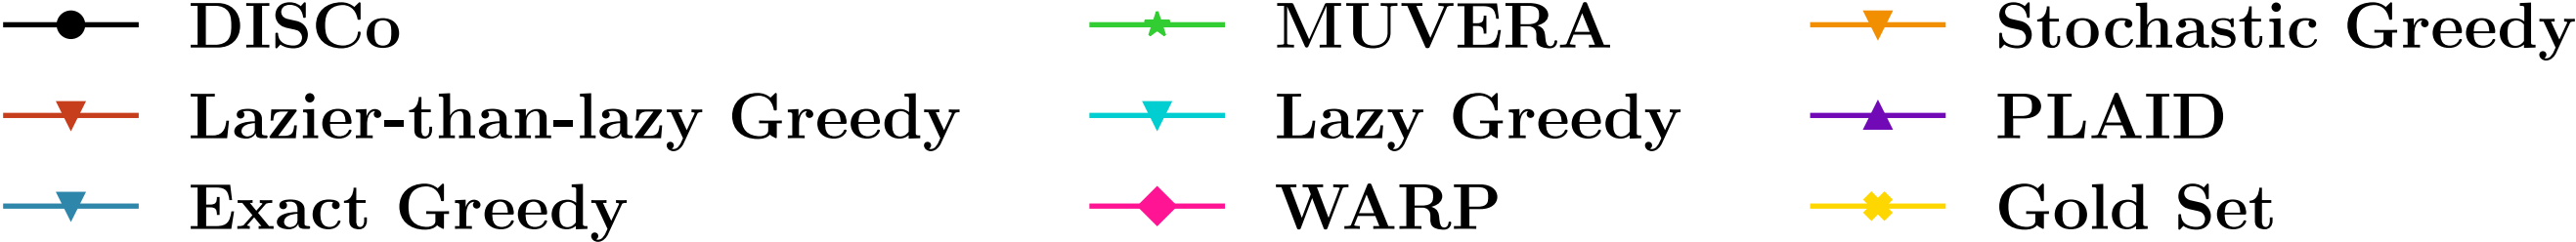

Supplement: supplementary_material [file plot3_5_1_legend.pdf › DISCO/notebooks/plots/plot3_5_1_legend.pdf]

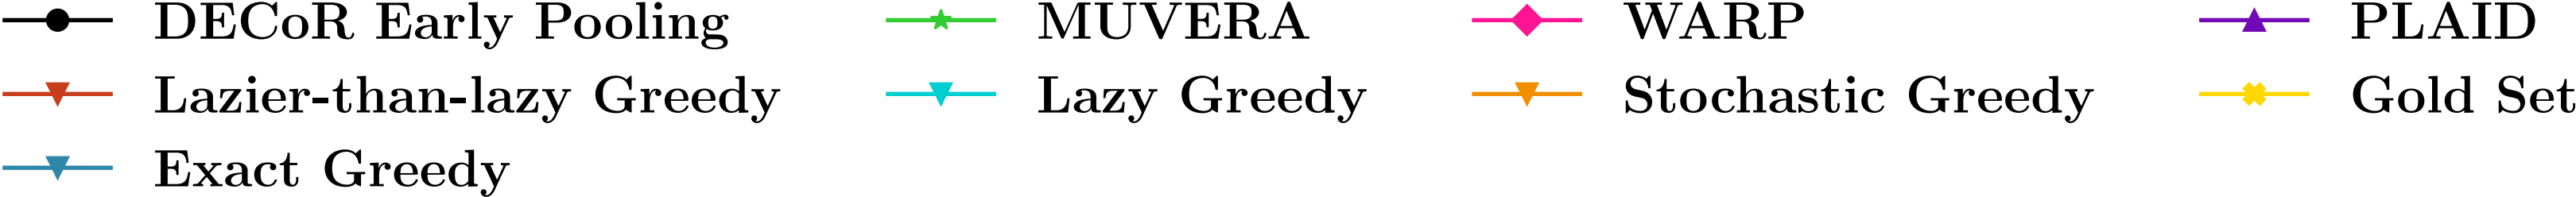

Supplement: supplementary_material [file plot3_legend.pdf › DISCO/notebooks/plots/plot3_legend.pdf]

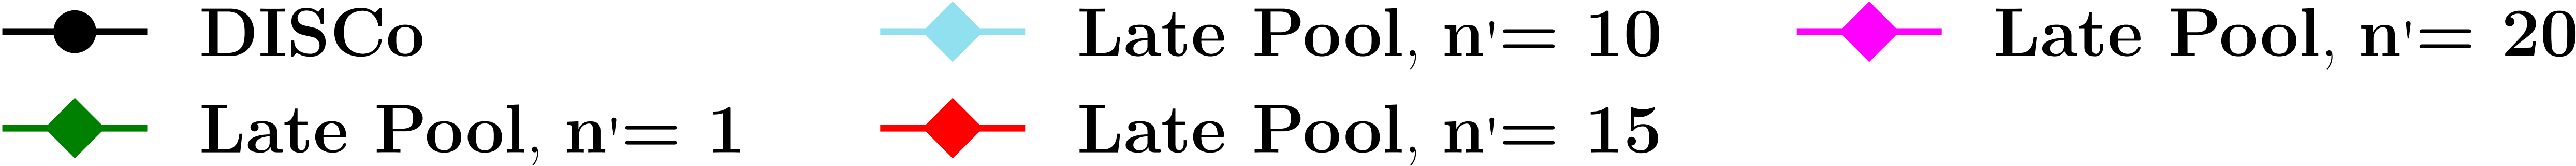

Supplement: supplementary_material [file plot4_1_legend.pdf › DISCO/notebooks/plots/plot4_1_legend.pdf]

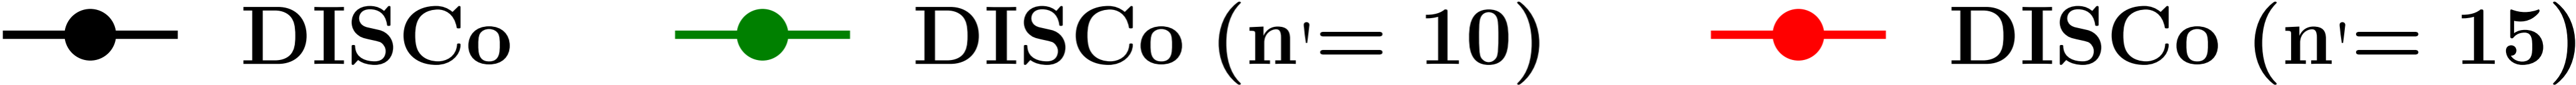

Supplement: supplementary_material [file plot4_2_legend.pdf › DISCO/notebooks/plots/plot4_2_legend.pdf]

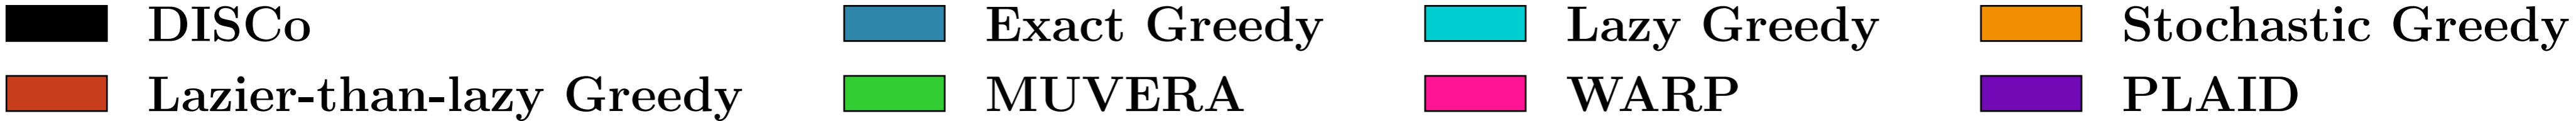

Supplement: supplementary_material [file plot_3_5_legend.pdf › DISCO/notebooks/plots/plot_3_5_legend.pdf]

25

20

 $K \rightarrow$ 

10

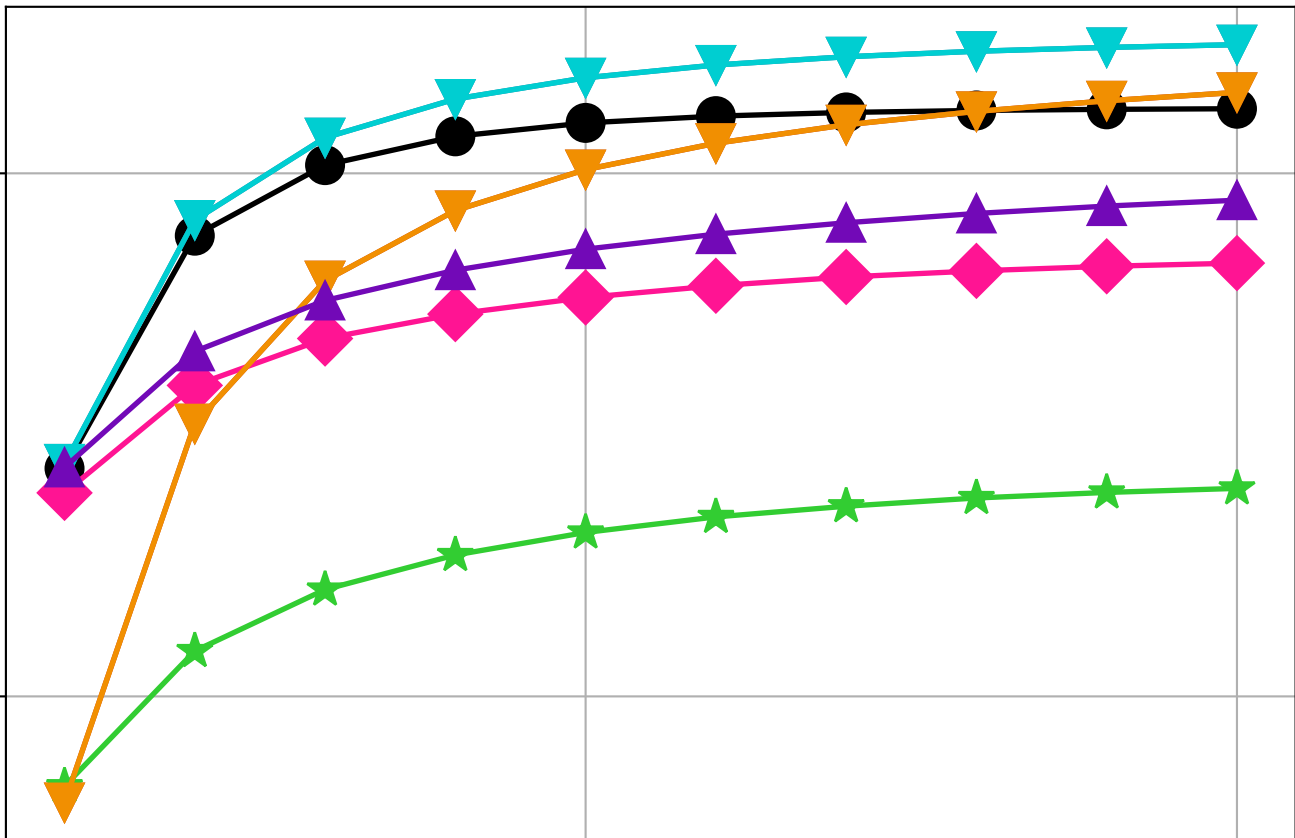

Supplement: supplementary_material [file pooled_covK_supp.pdf › DISCO/notebooks/plots/pooled_covK_supp.pdf]

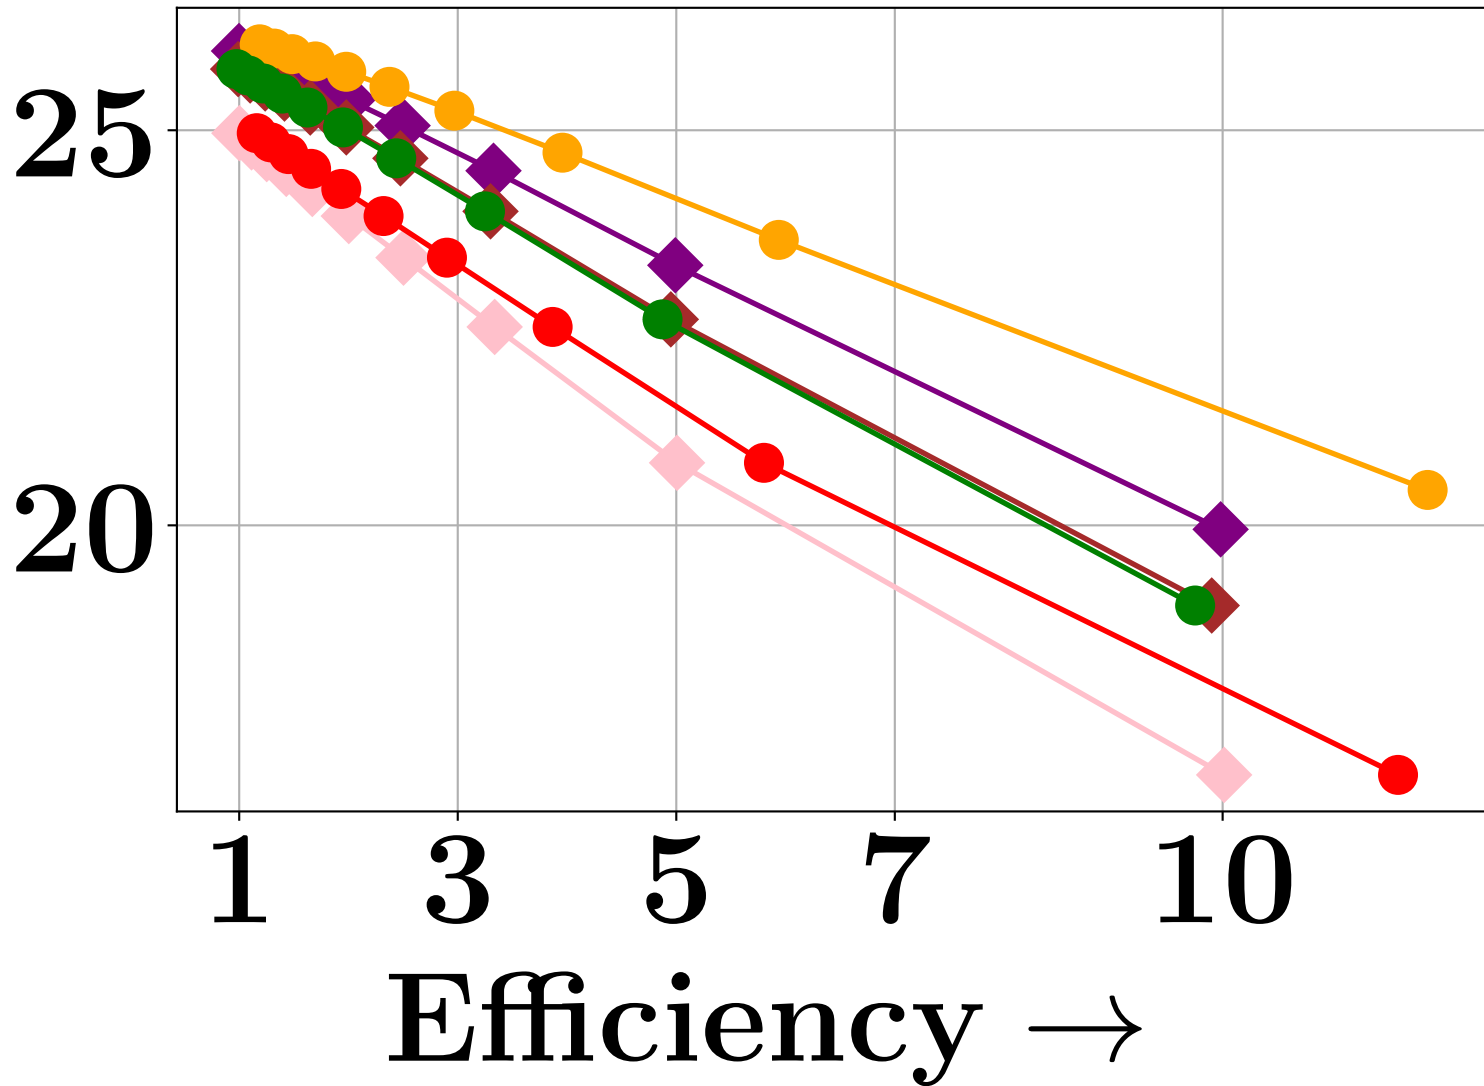

Supplement: supplementary_material [file pooled_greedy_supp.pdf › DISCO/notebooks/plots/pooled_greedy_supp.pdf]

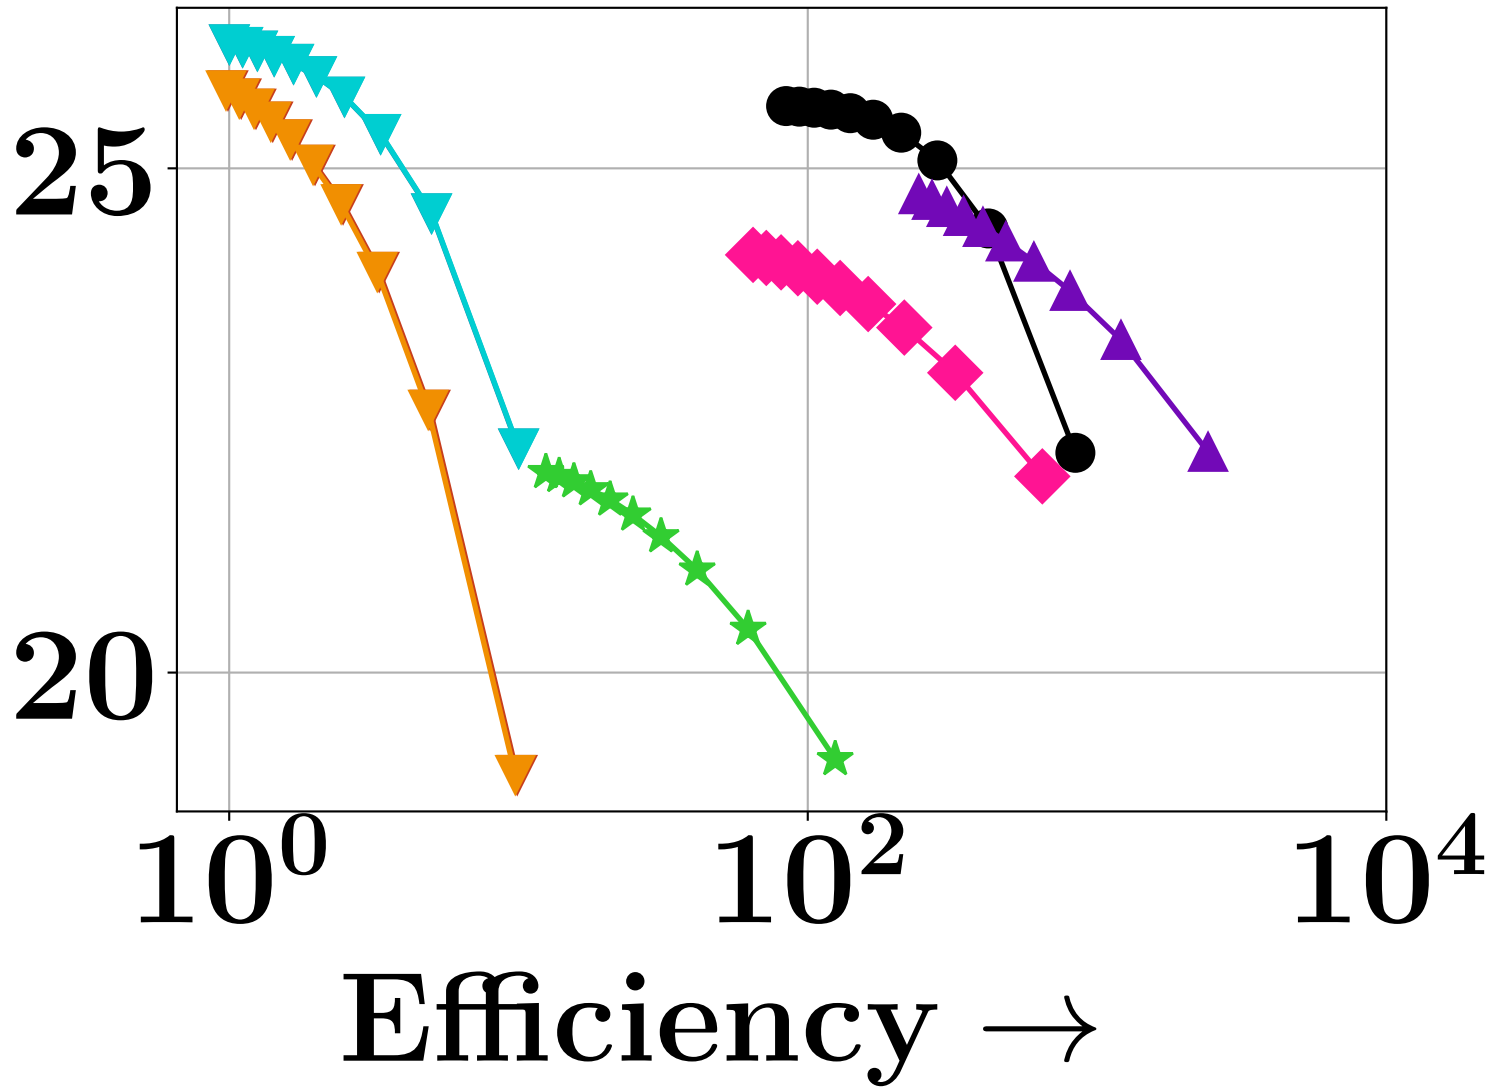

Supplement: supplementary_material [file pooled_plot2.pdf › DISCO/notebooks/plots/pooled_plot2.pdf]

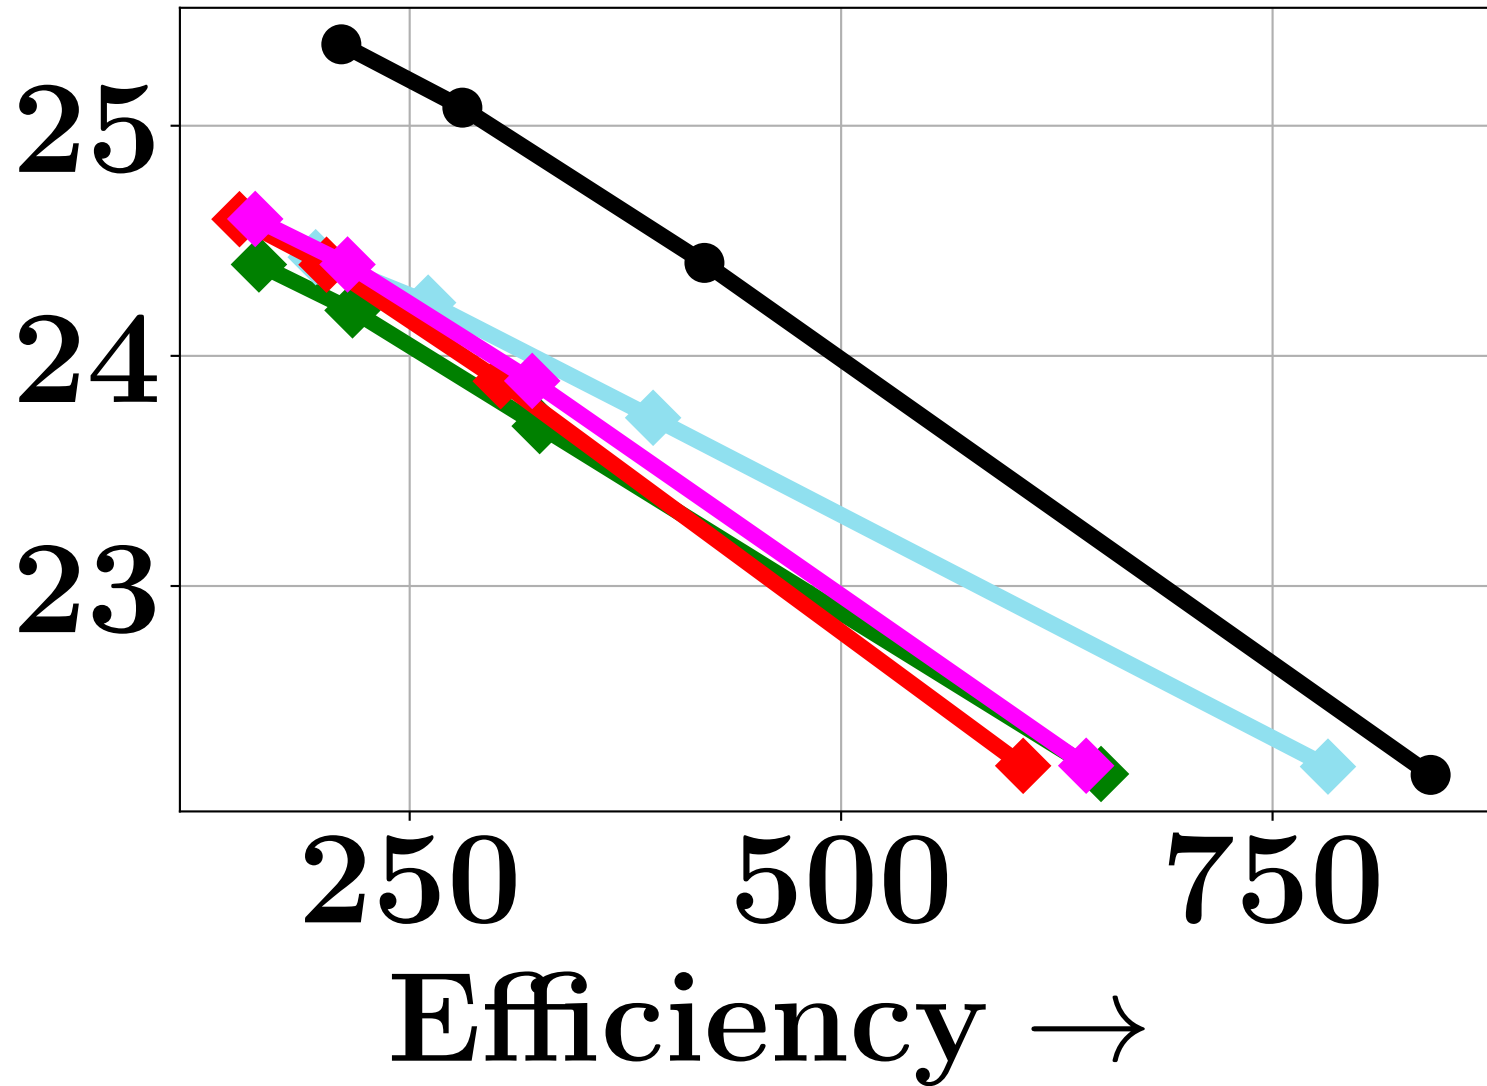

Supplement: supplementary_material [file pooled_plot_4_1.pdf › DISCO/notebooks/plots/pooled_plot_4_1.pdf]

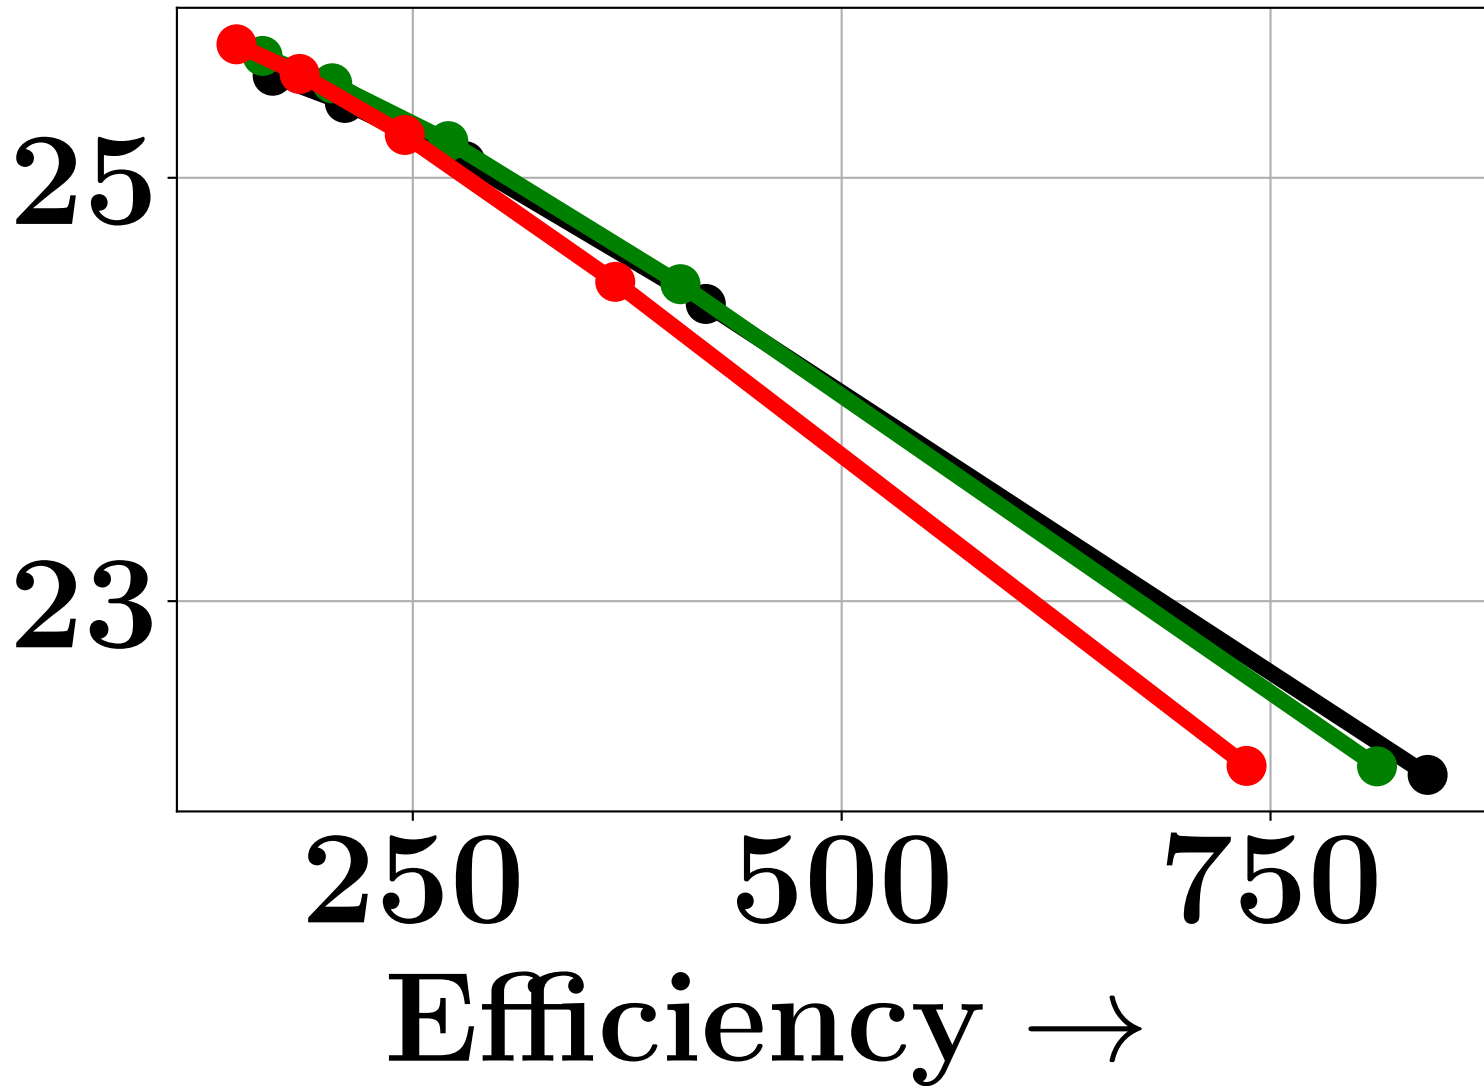

Supplement: supplementary_material [file pooled_plot_4_2.pdf › DISCO/notebooks/plots/pooled_plot_4_2.pdf]

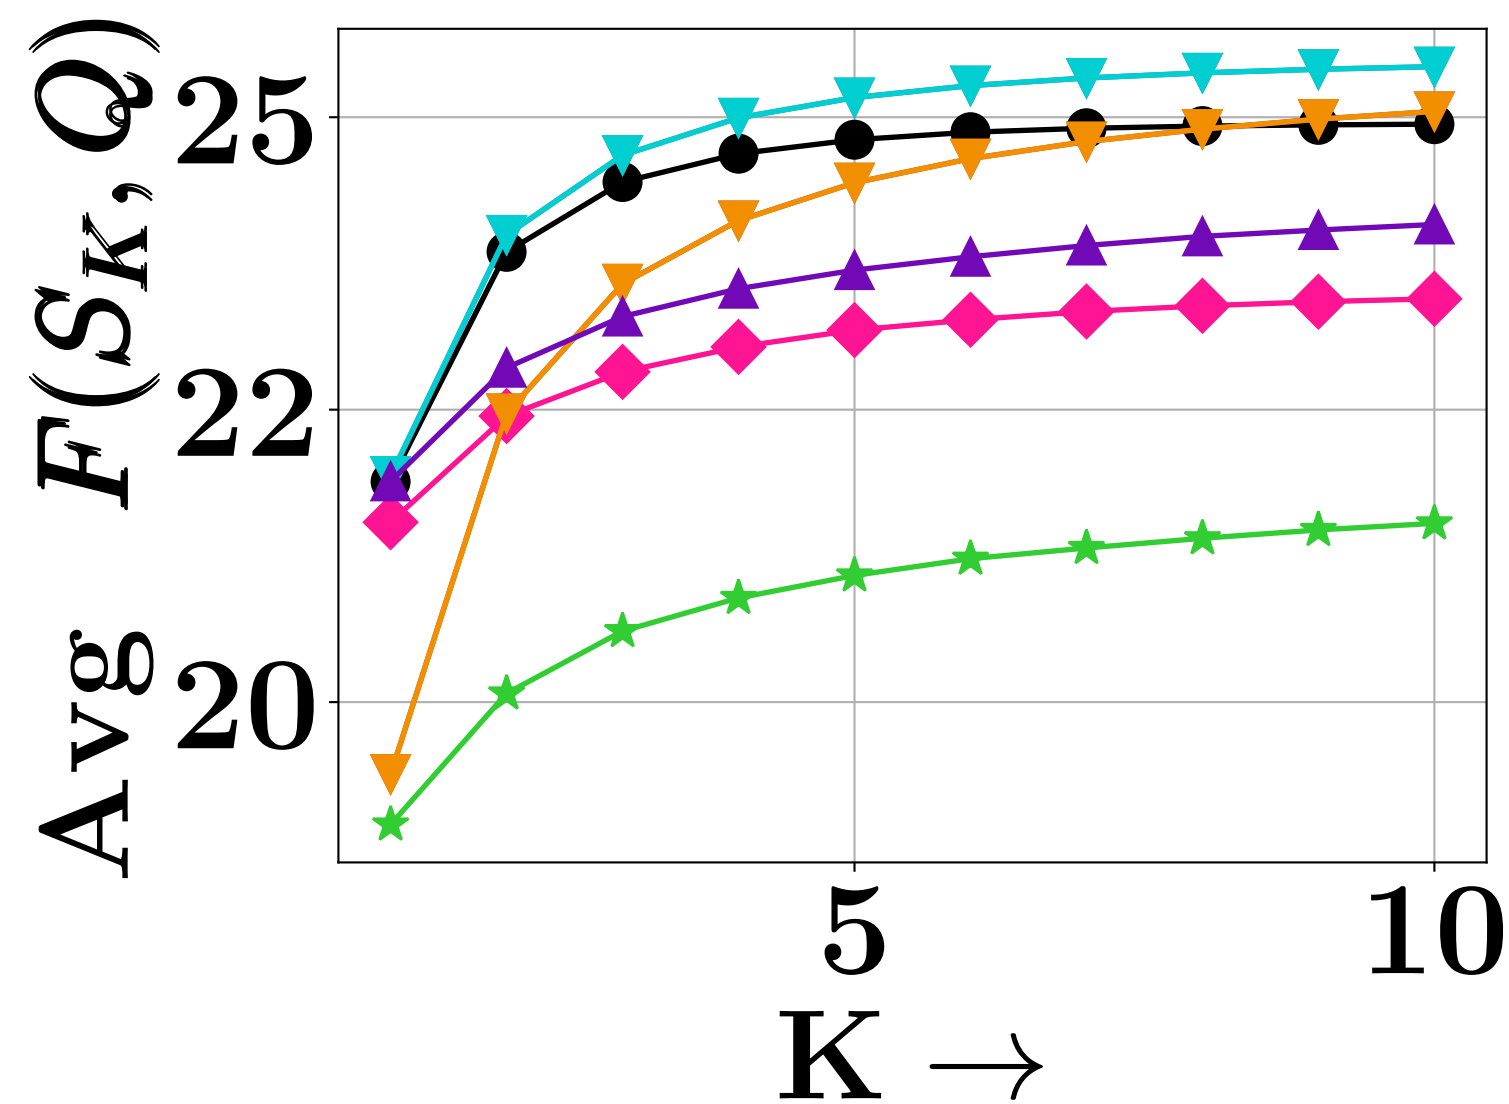

Supplement: supplementary_material [file science_covK_supp.pdf › DISCO/notebooks/plots/science_covK_supp.pdf]

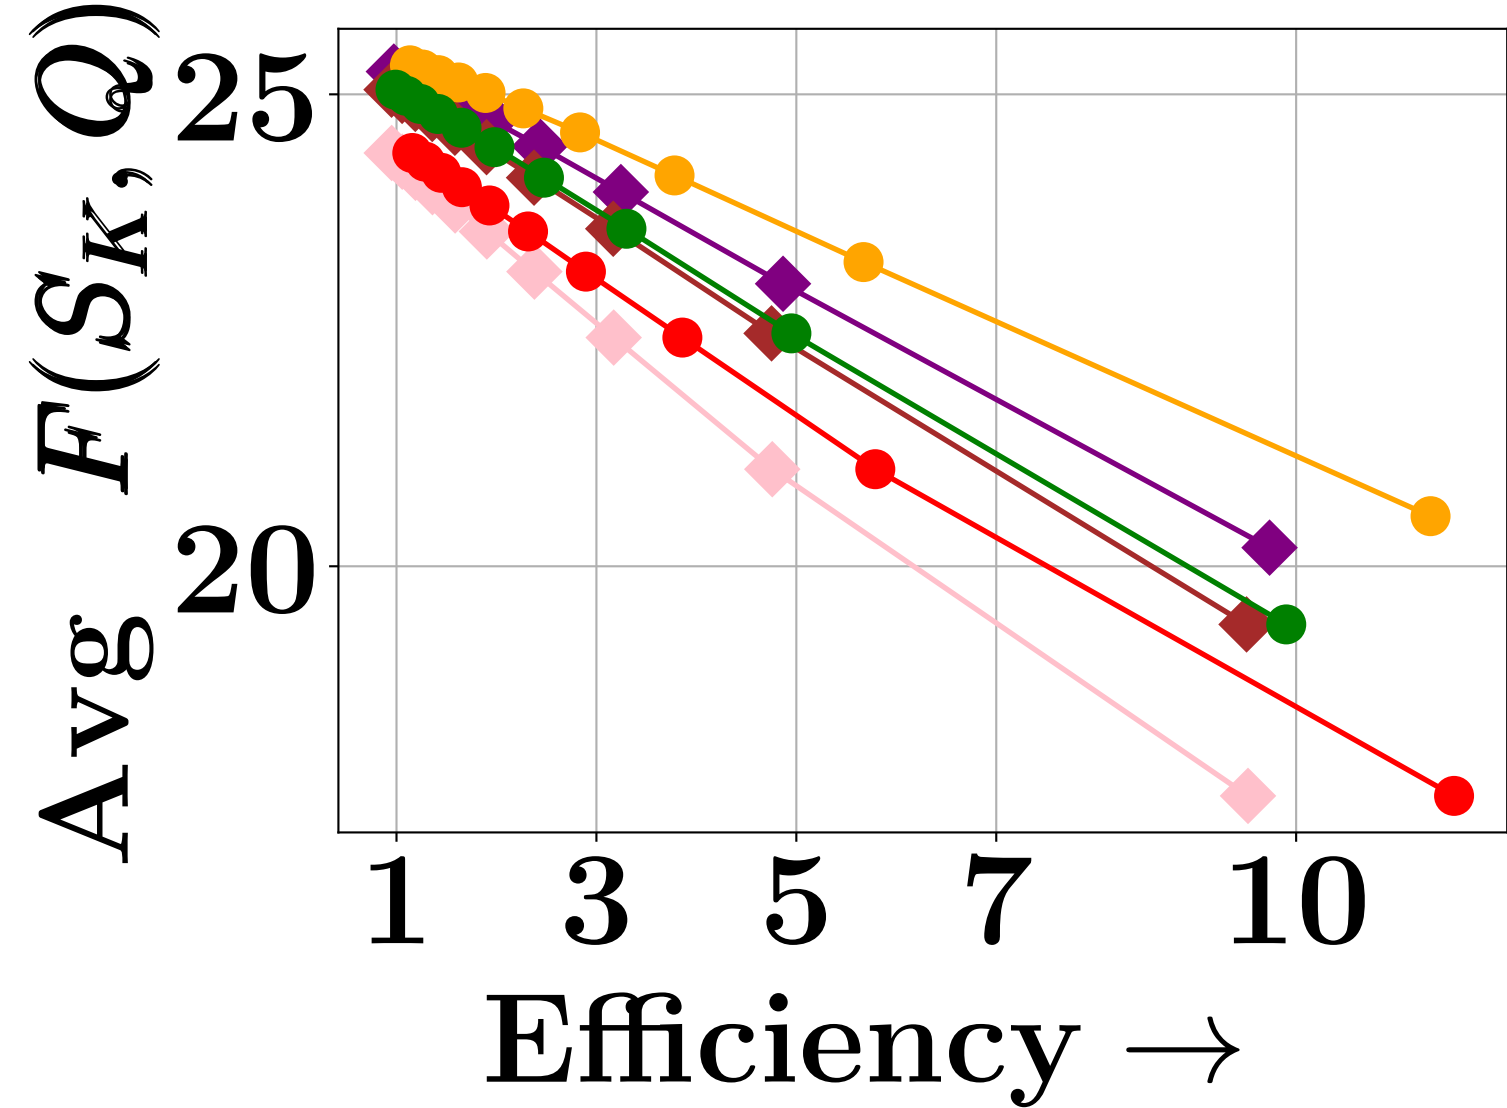

Supplement: supplementary_material [file science_greedy_supp.pdf › DISCO/notebooks/plots/science_greedy_supp.pdf]

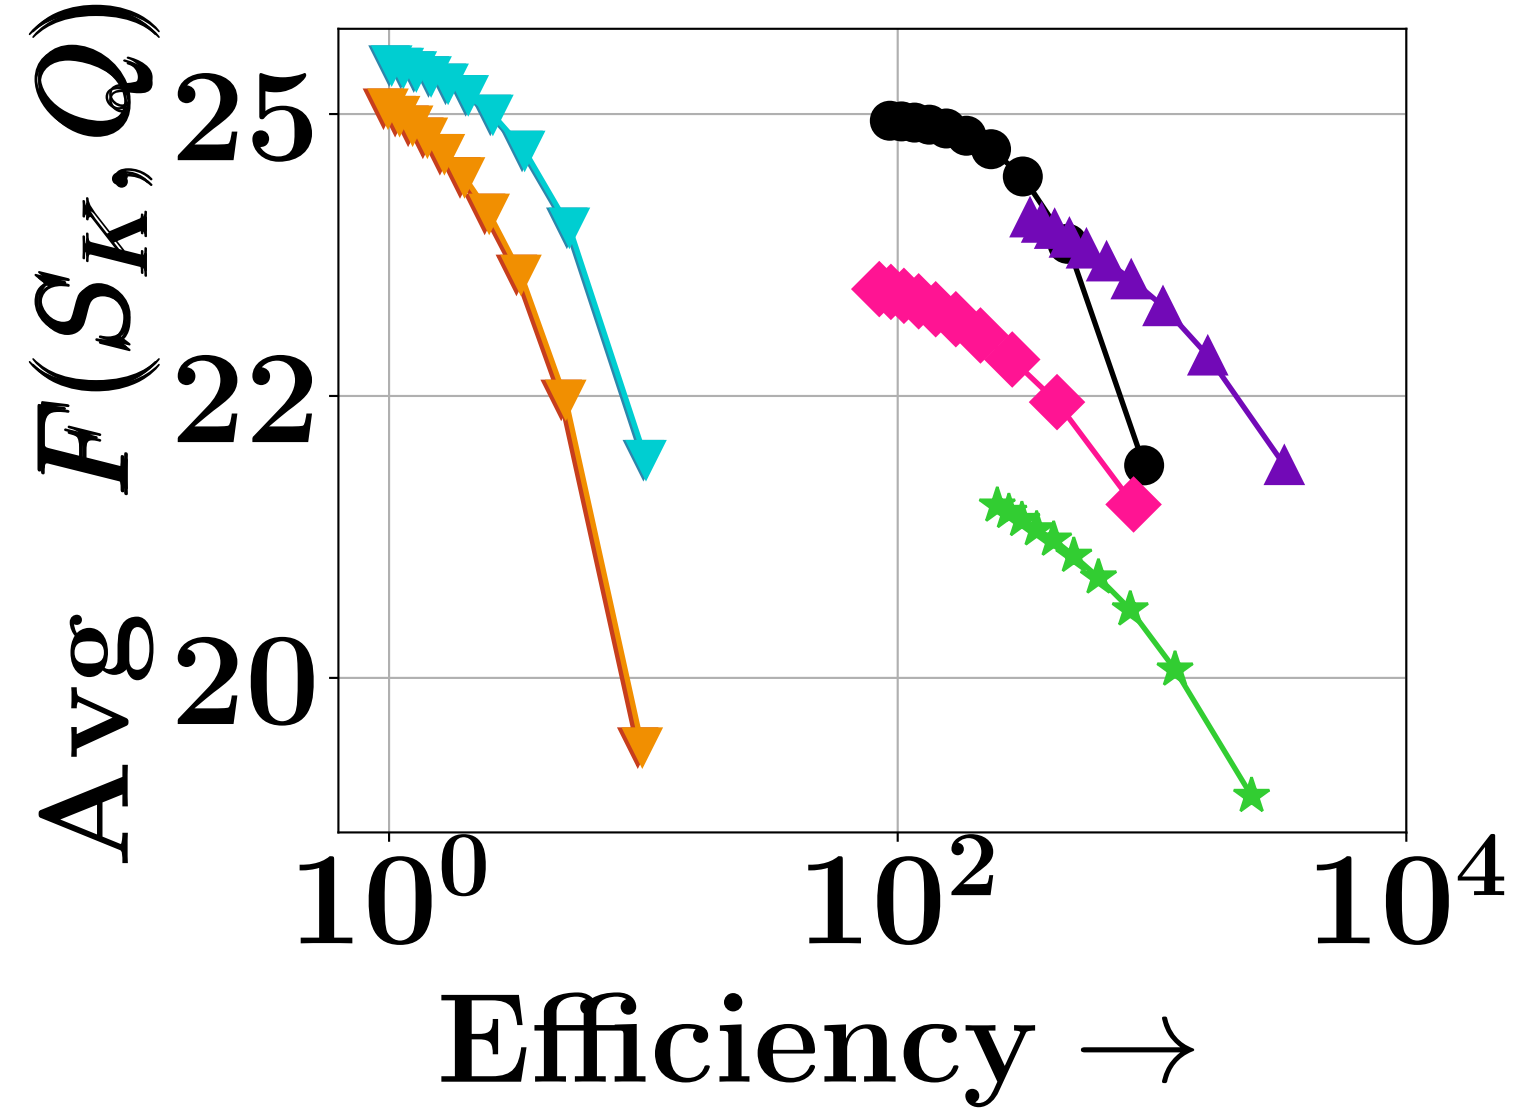

Supplement: supplementary_material [file science_plot2.pdf › DISCO/notebooks/plots/science_plot2.pdf]

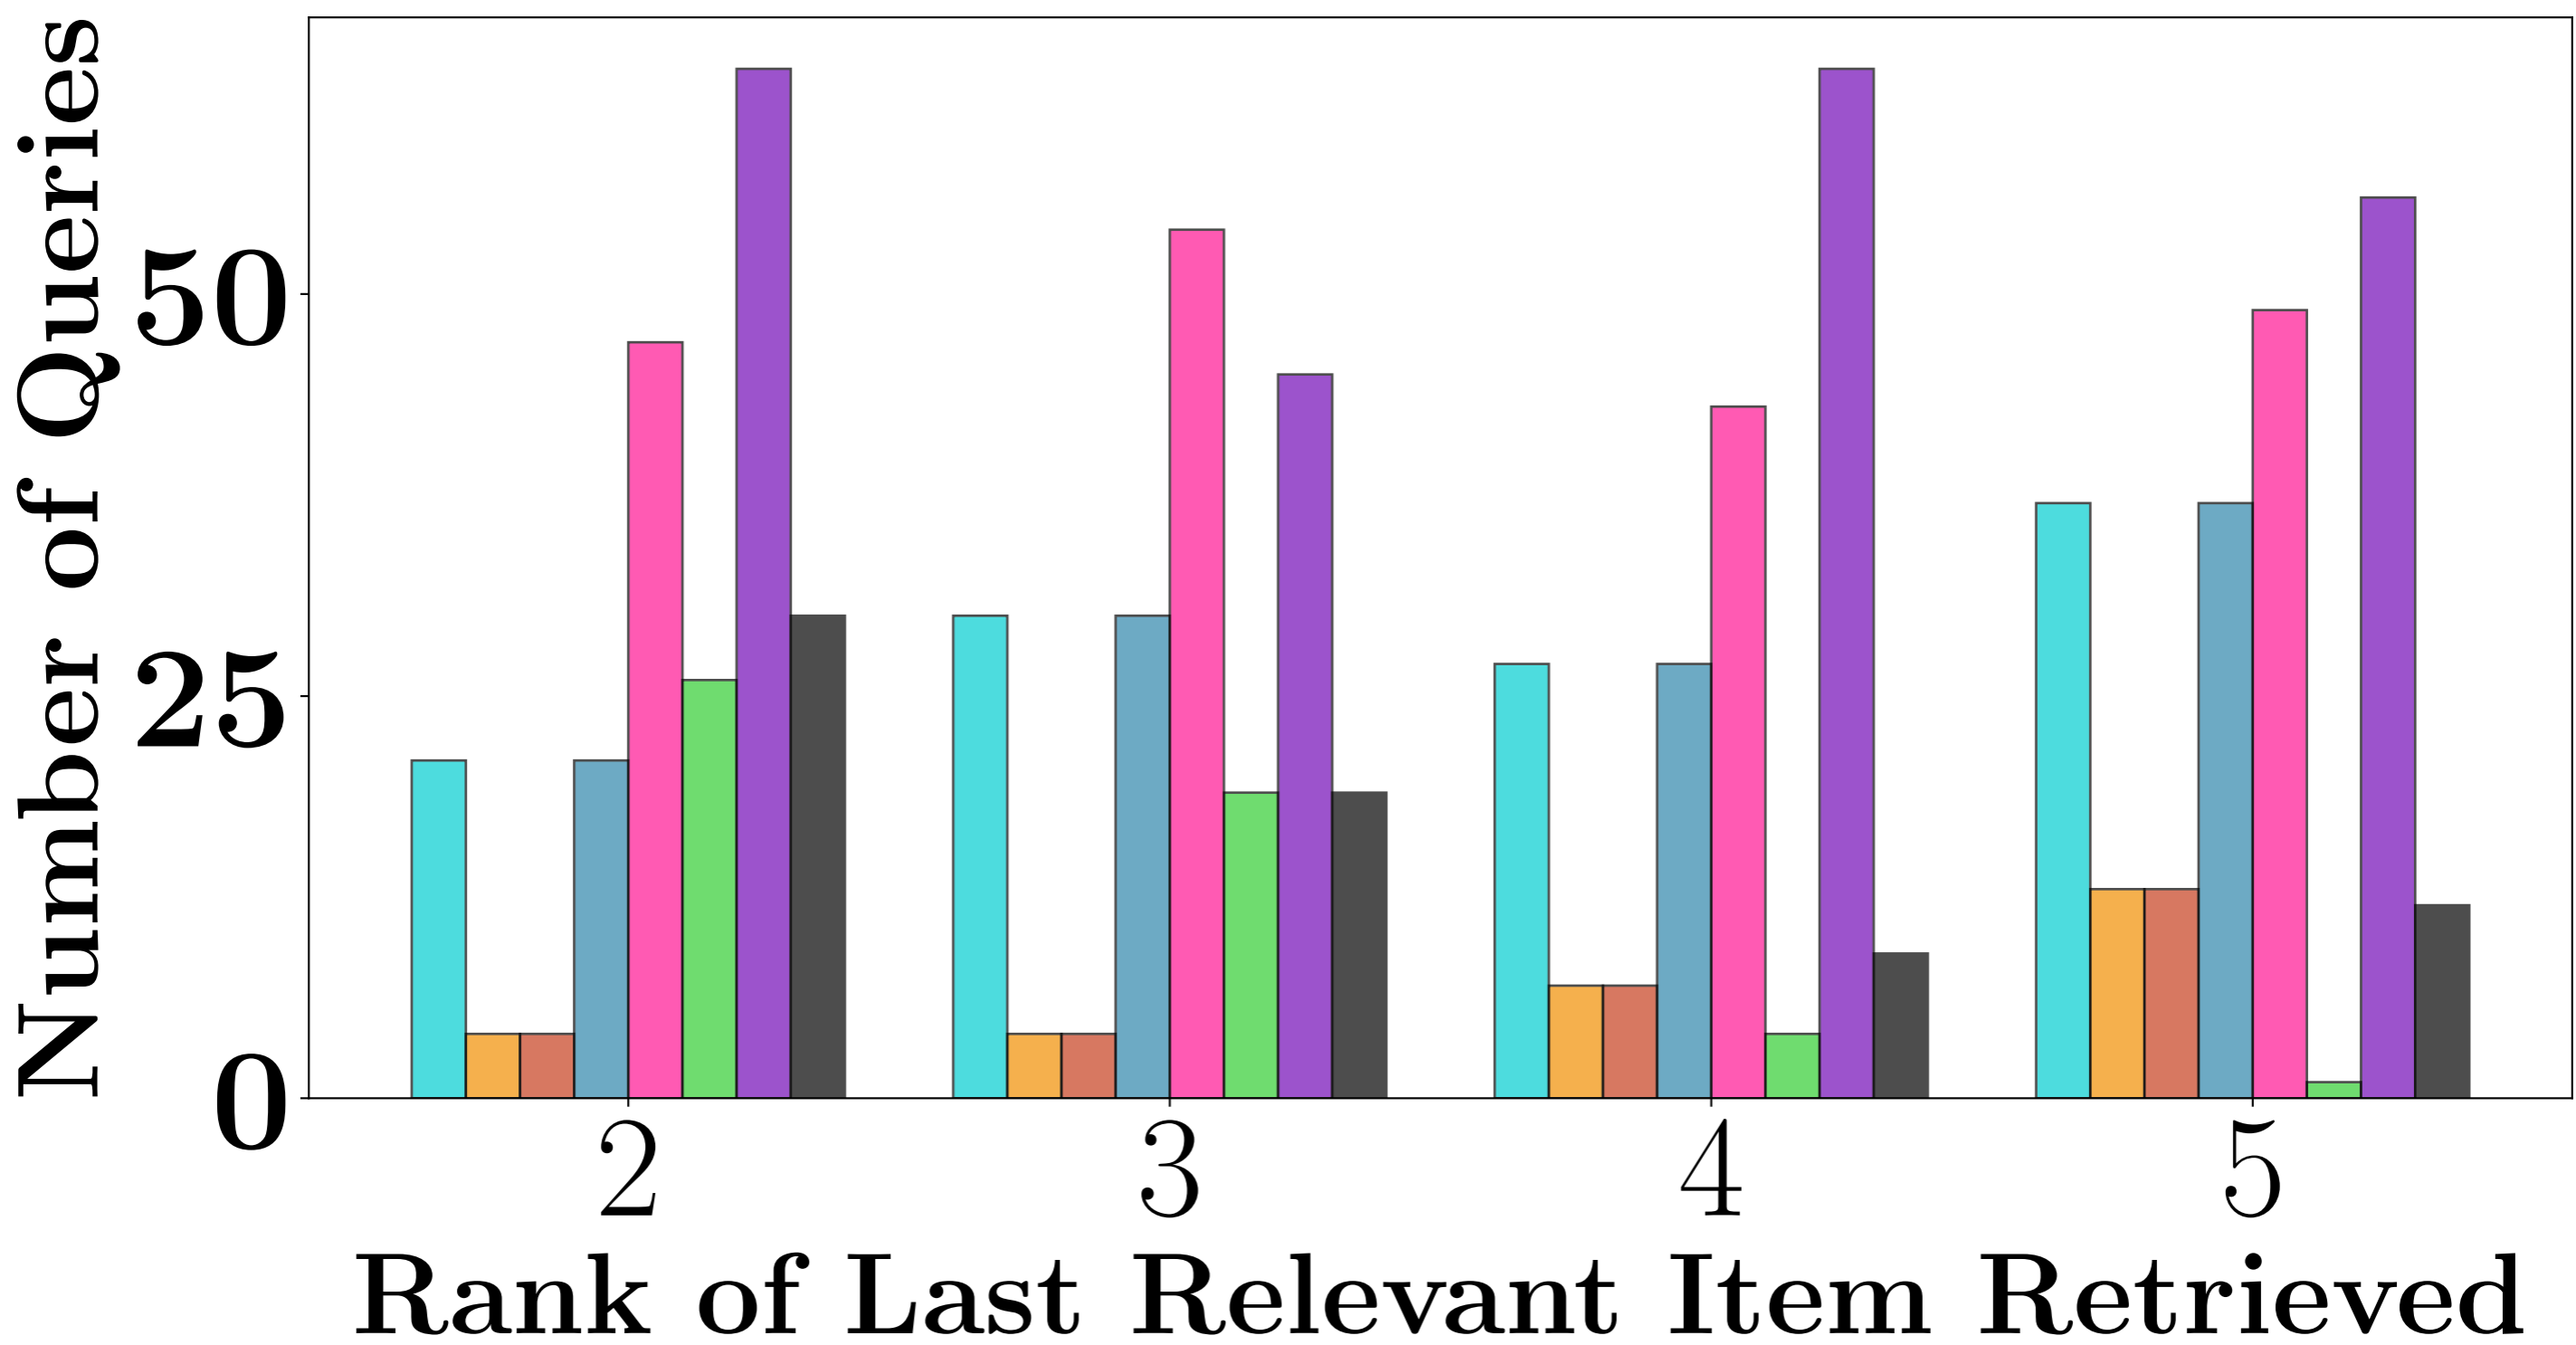

Supplement: supplementary_material [file science_plot3_5_histogram.pdf › DISCO/notebooks/plots/science_plot3_5_histogram.pdf]

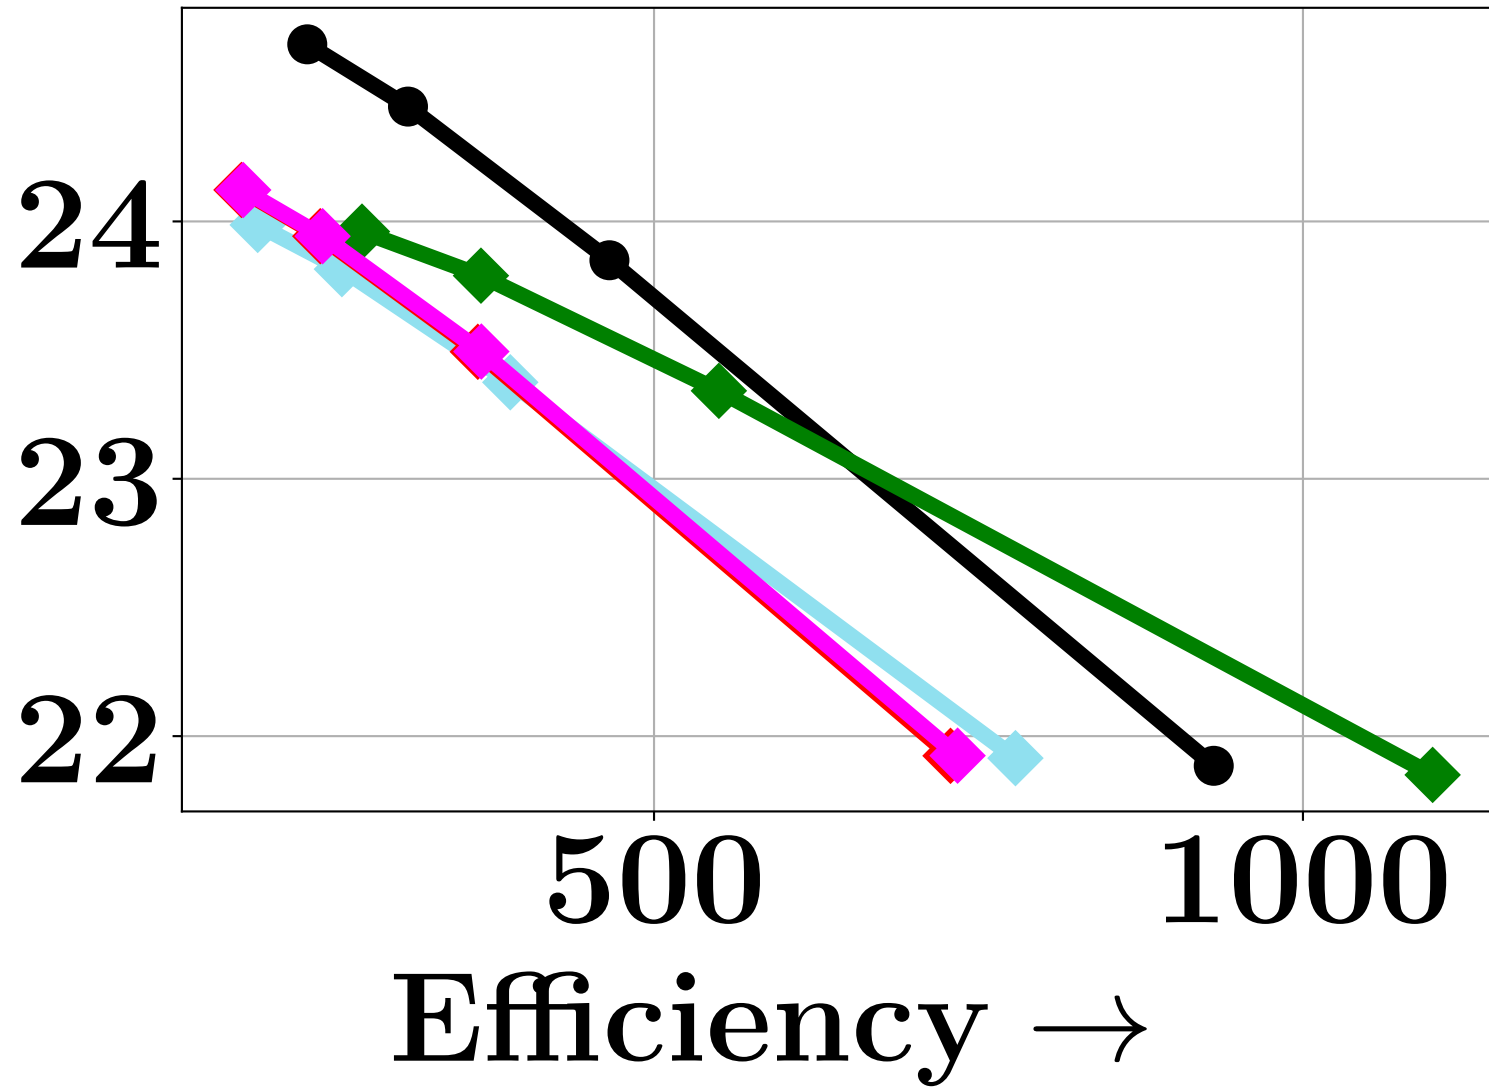

Supplement: supplementary_material [file science_plot_4_1.pdf › DISCO/notebooks/plots/science_plot_4_1.pdf]

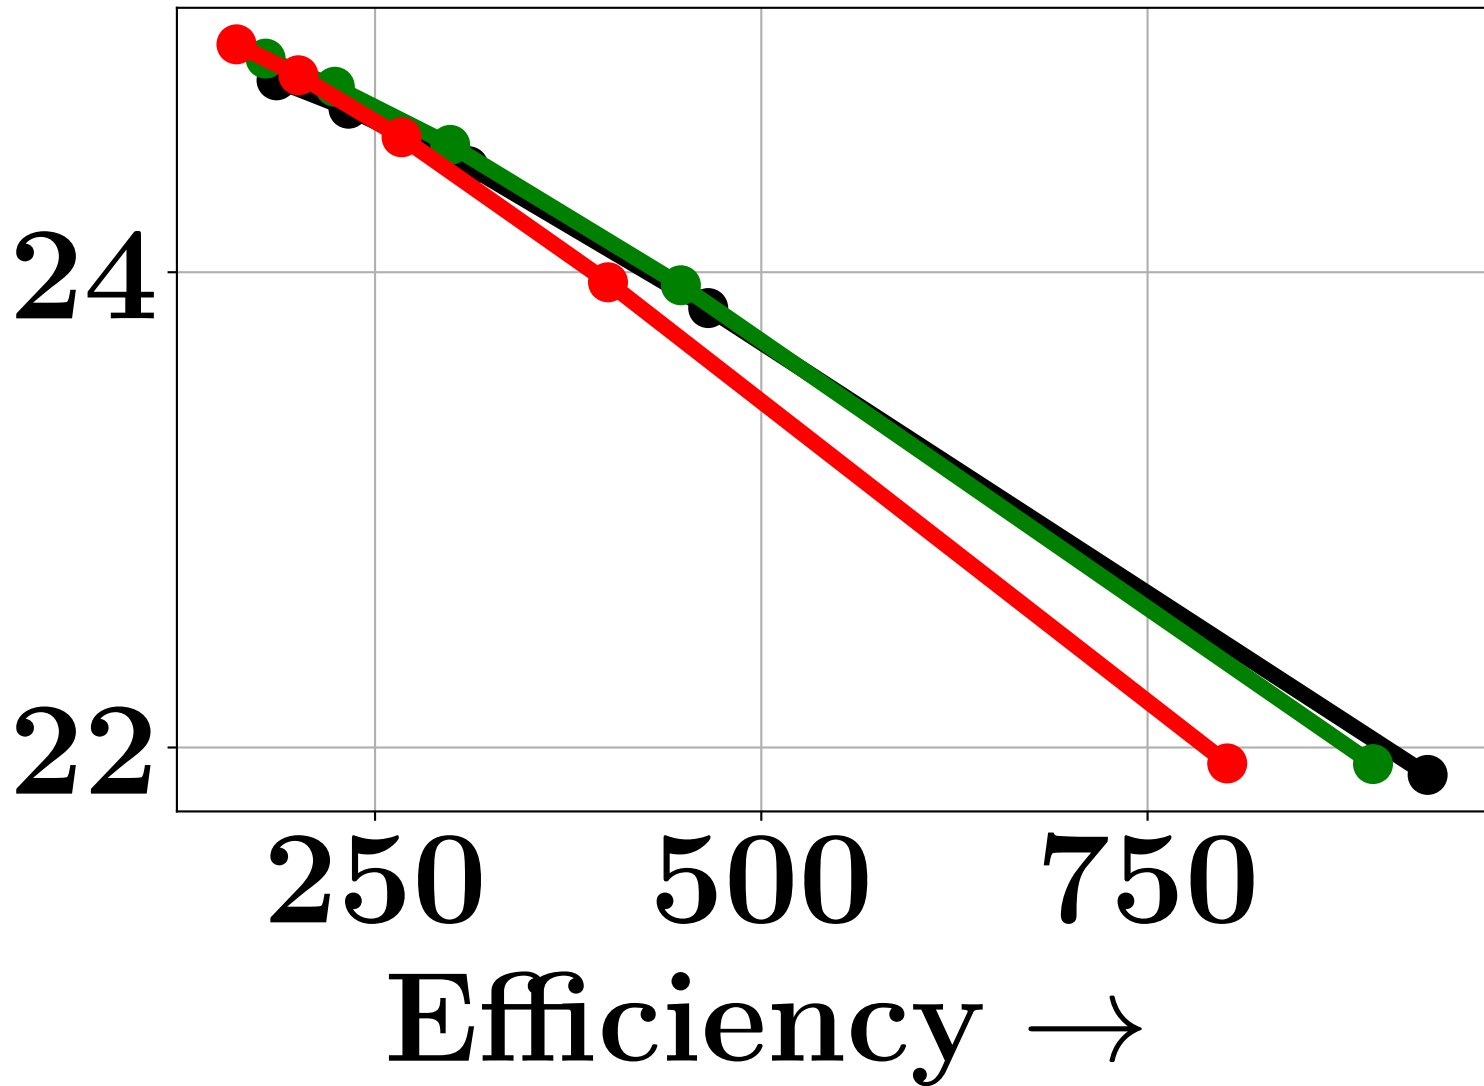

Supplement: supplementary_material [file science_plot_4_2.pdf › DISCO/notebooks/plots/science_plot_4_2.pdf]

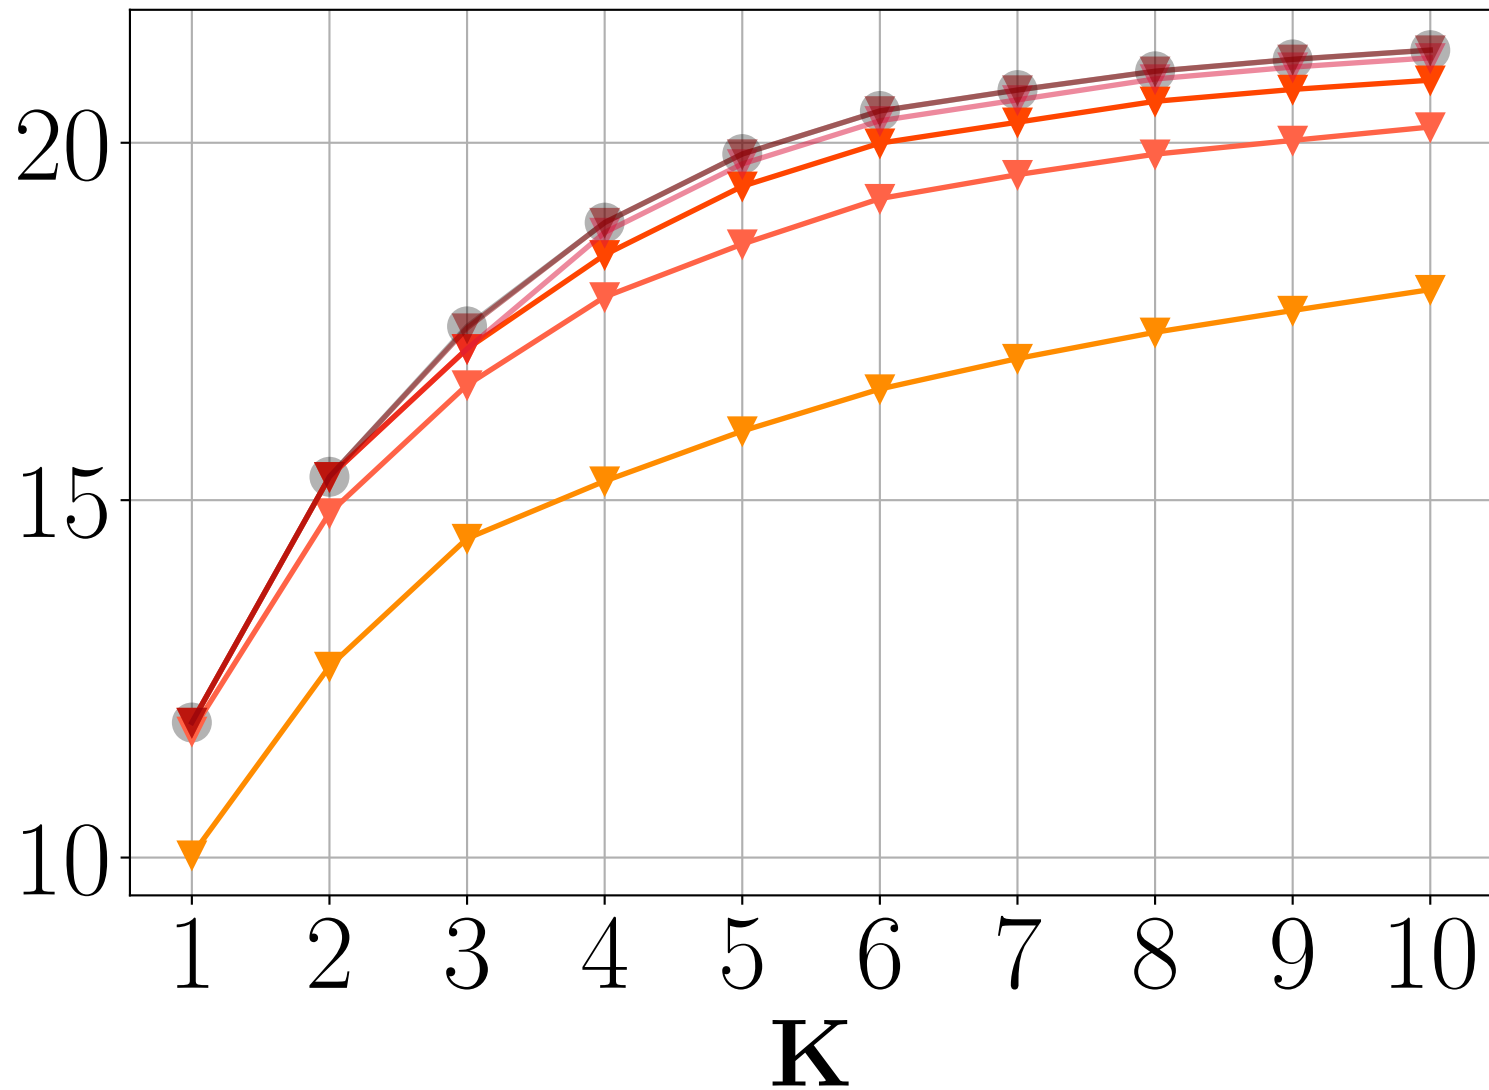

Supplement: supplementary_material [file scifact_f_s_vs_k.pdf › DISCO/notebooks/plots/scifact_f_s_vs_k.pdf]

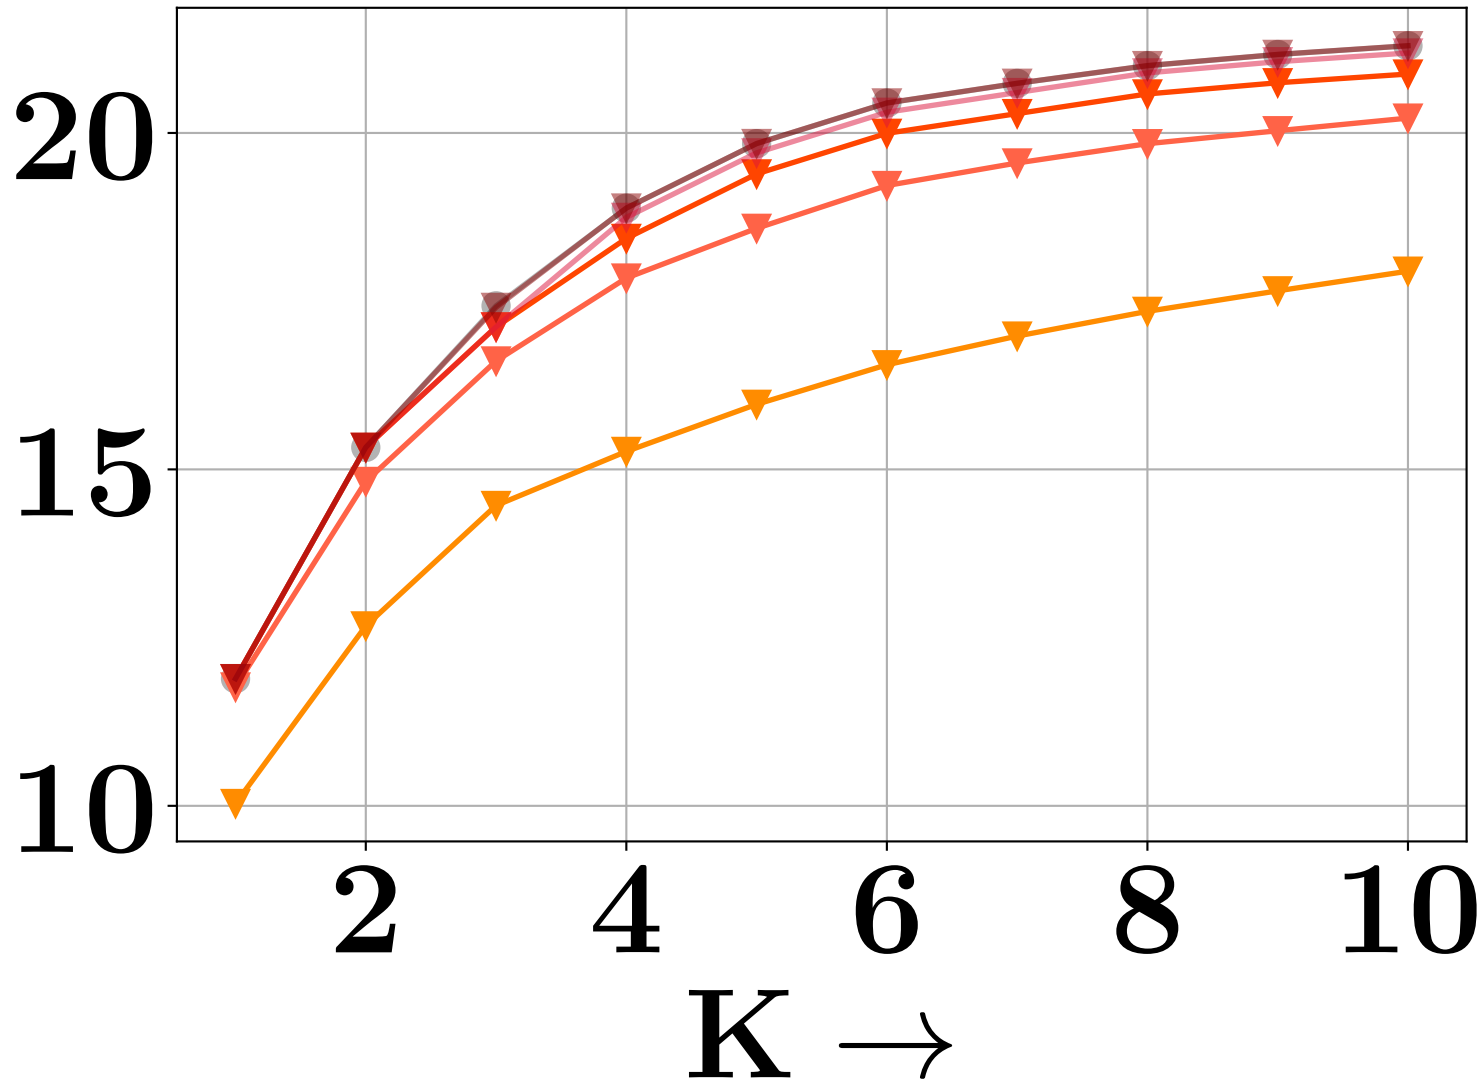

Supplement: supplementary_material [file scifact_plot1.pdf › DISCO/notebooks/plots/scifact_plot1.pdf]

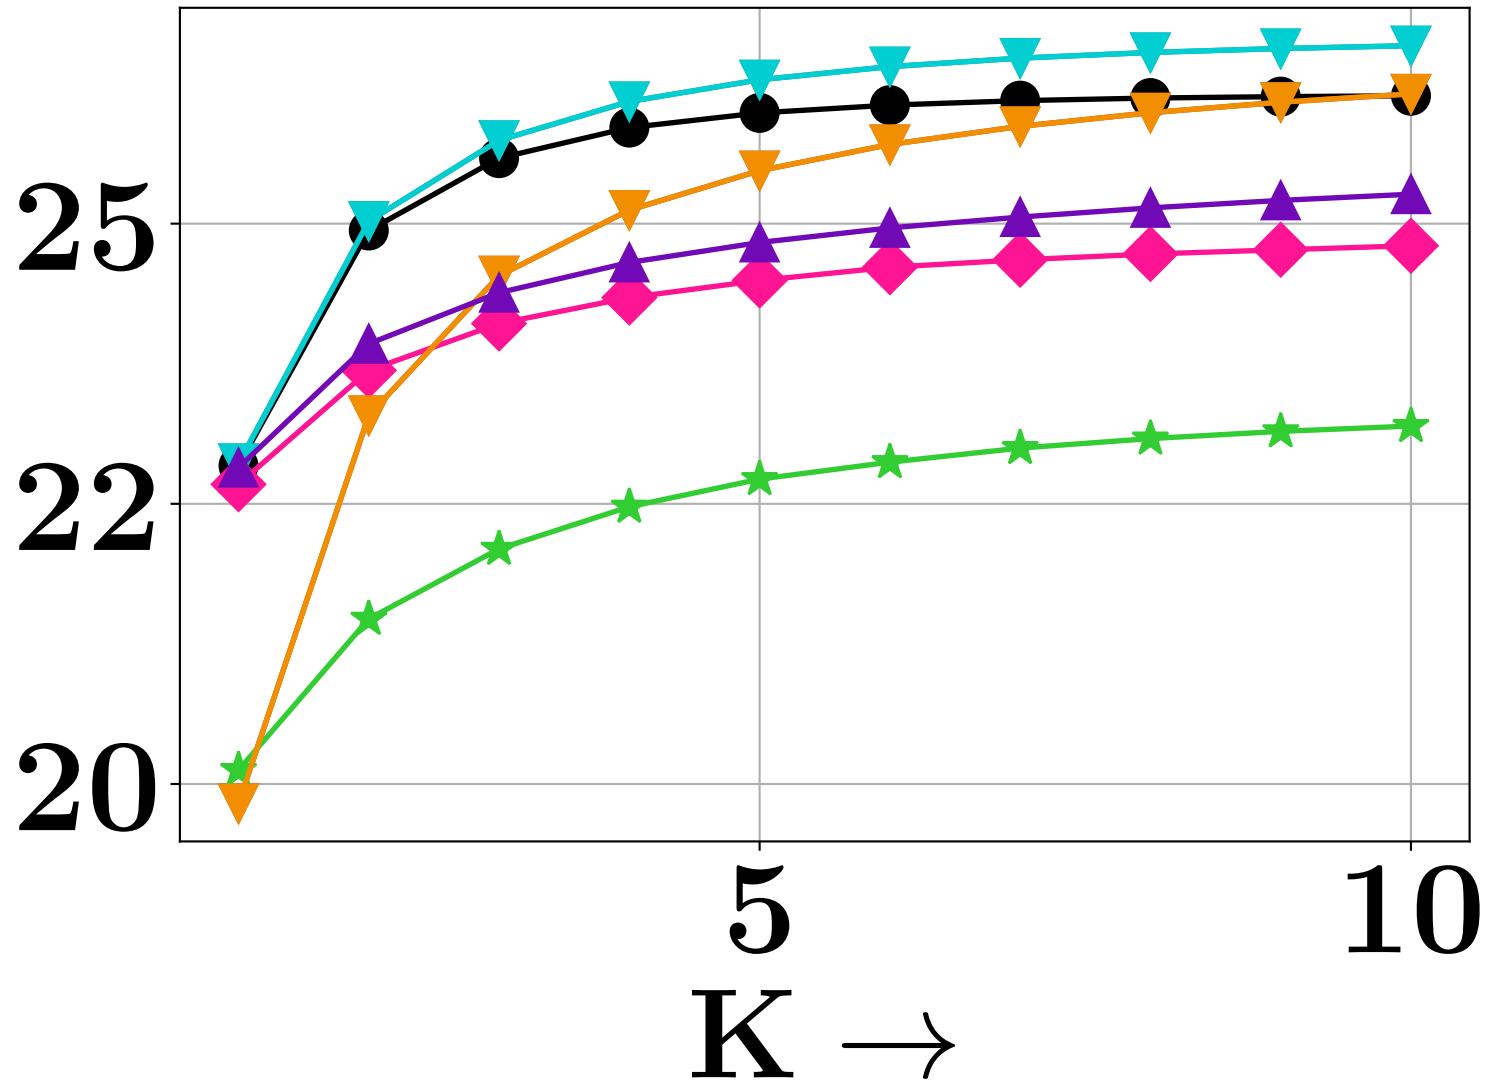

Supplement: supplementary_material [file technology_covK_supp.pdf › DISCO/notebooks/plots/technology_covK_supp.pdf]

25

20

1

3

5

7

10

Efficiency  $\rightarrow$ 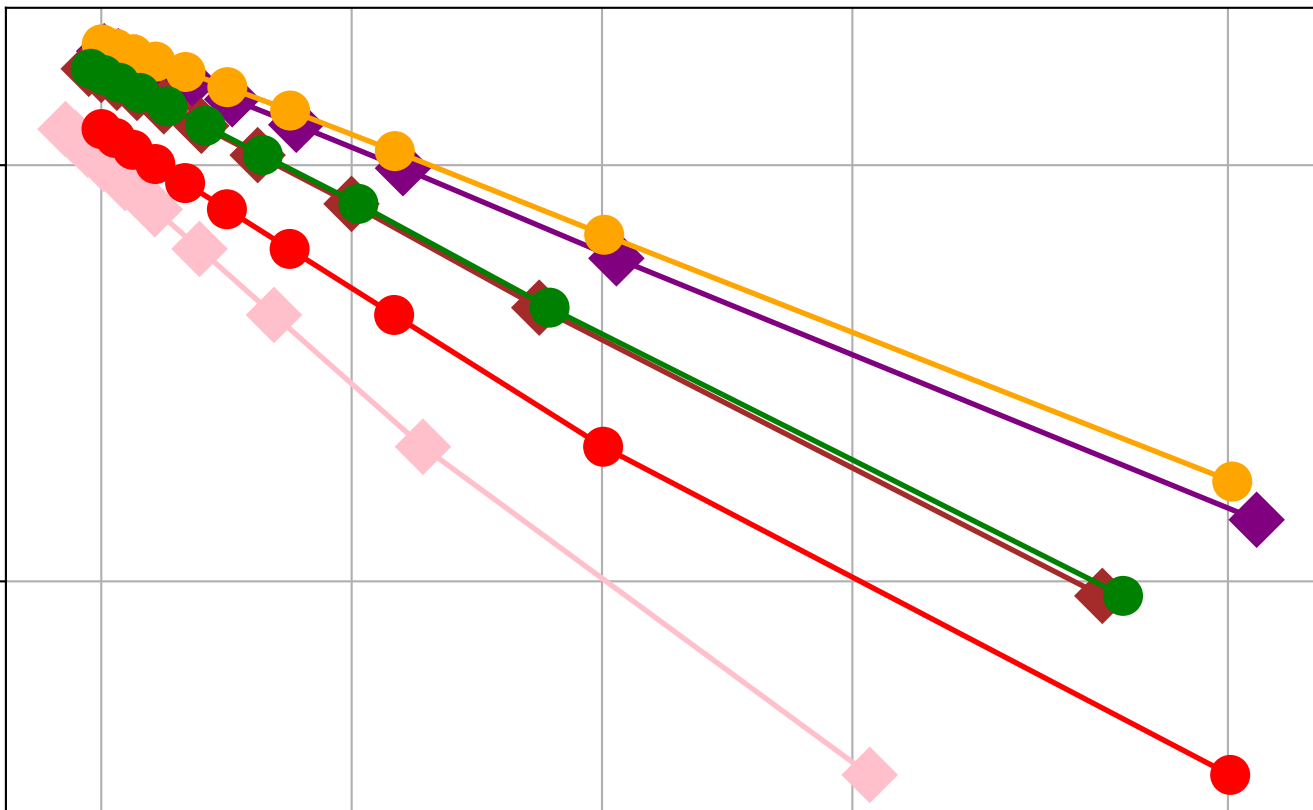

Supplement: supplementary_material [file technology_greedy_supp.pdf › DISCO/notebooks/plots/technology_greedy_supp.pdf]

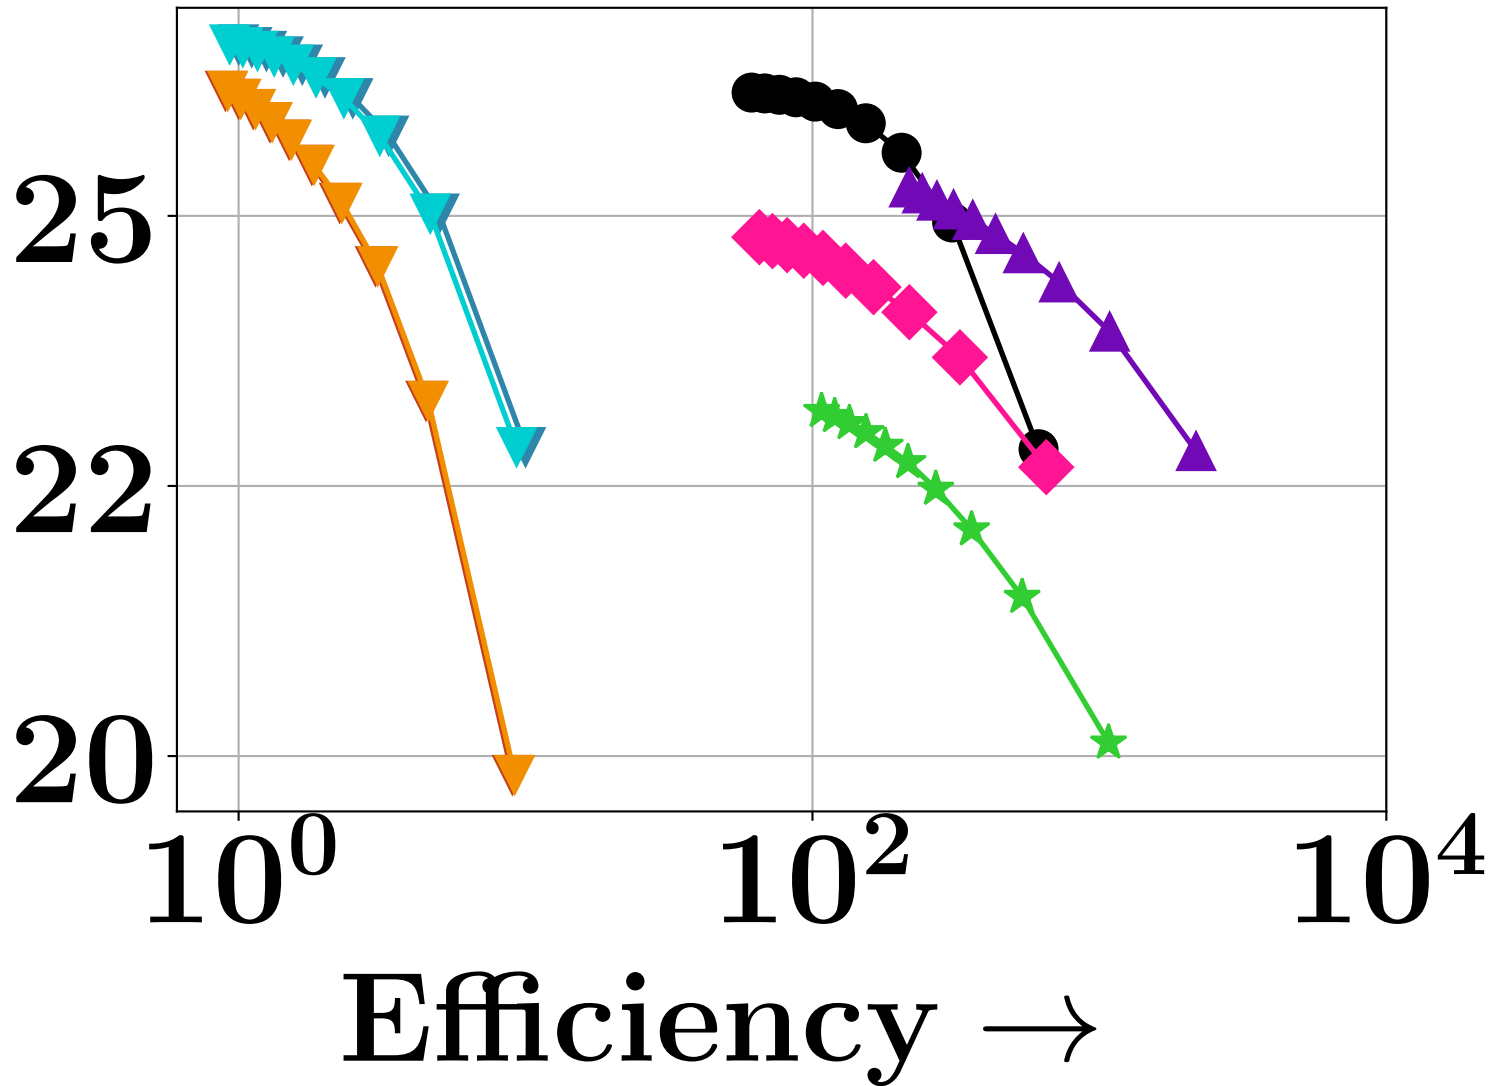

Supplement: supplementary_material [file technology_plot2.pdf › DISCO/notebooks/plots/technology_plot2.pdf]

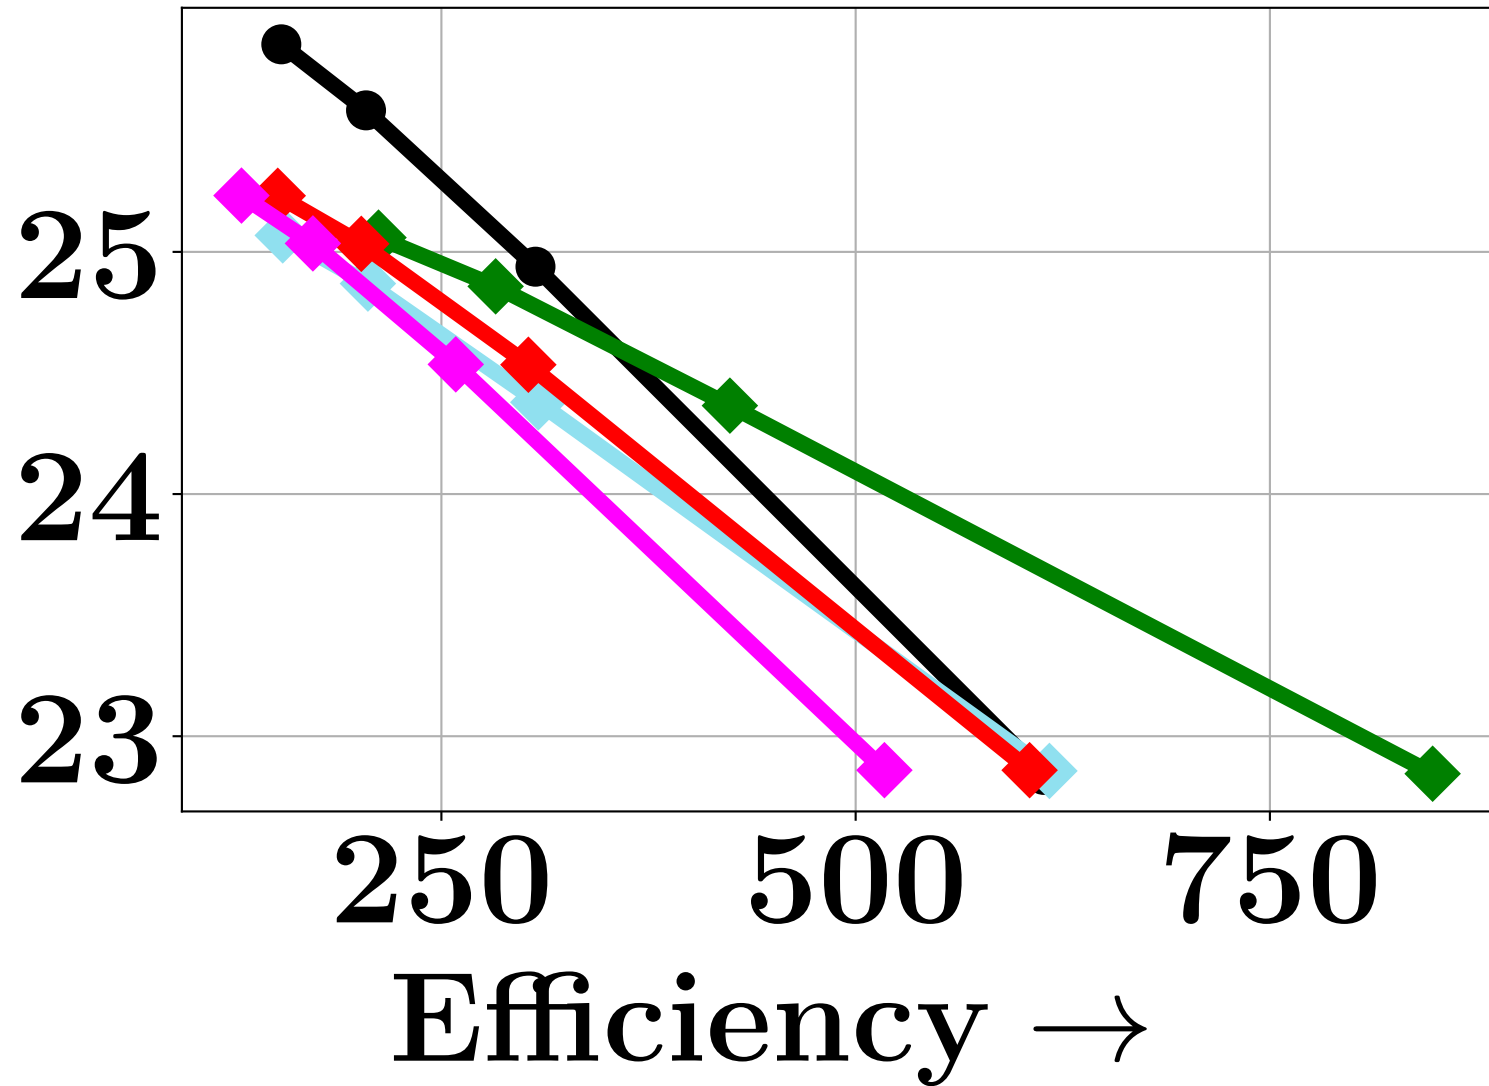

Supplement: supplementary_material [file technology_plot_4_1.pdf › DISCO/notebooks/plots/technology_plot_4_1.pdf]

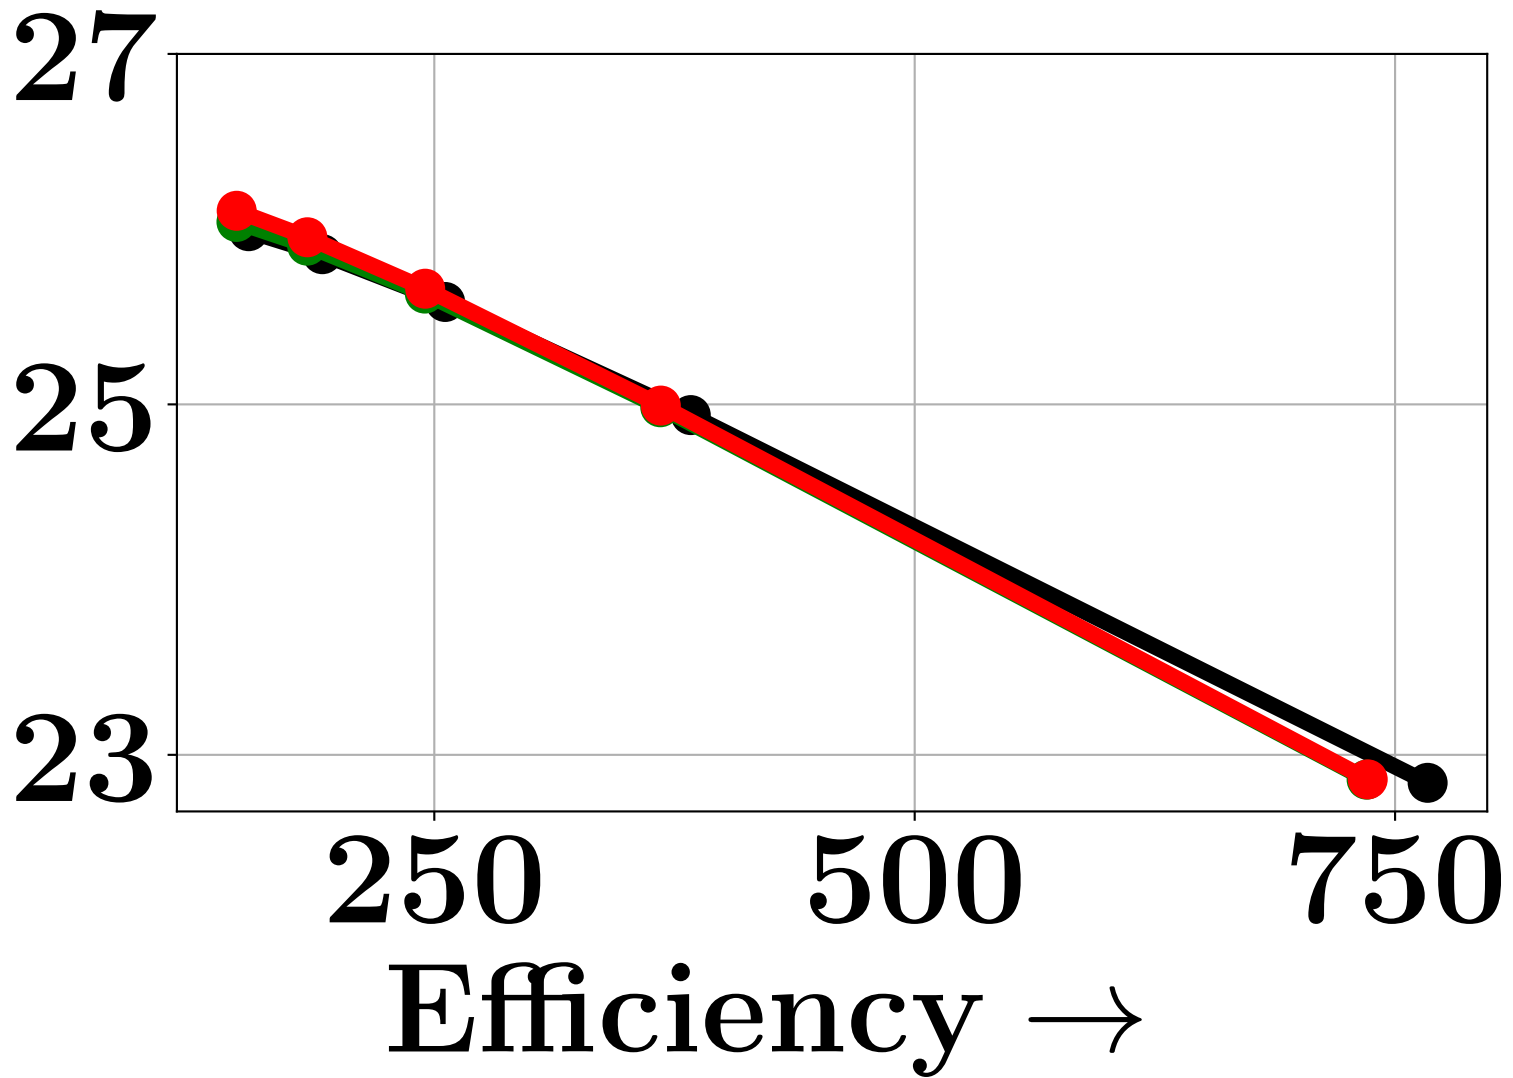

Supplement: supplementary_material [file technology_plot_4_2.pdf › DISCO/notebooks/plots/technology_plot_4_2.pdf]

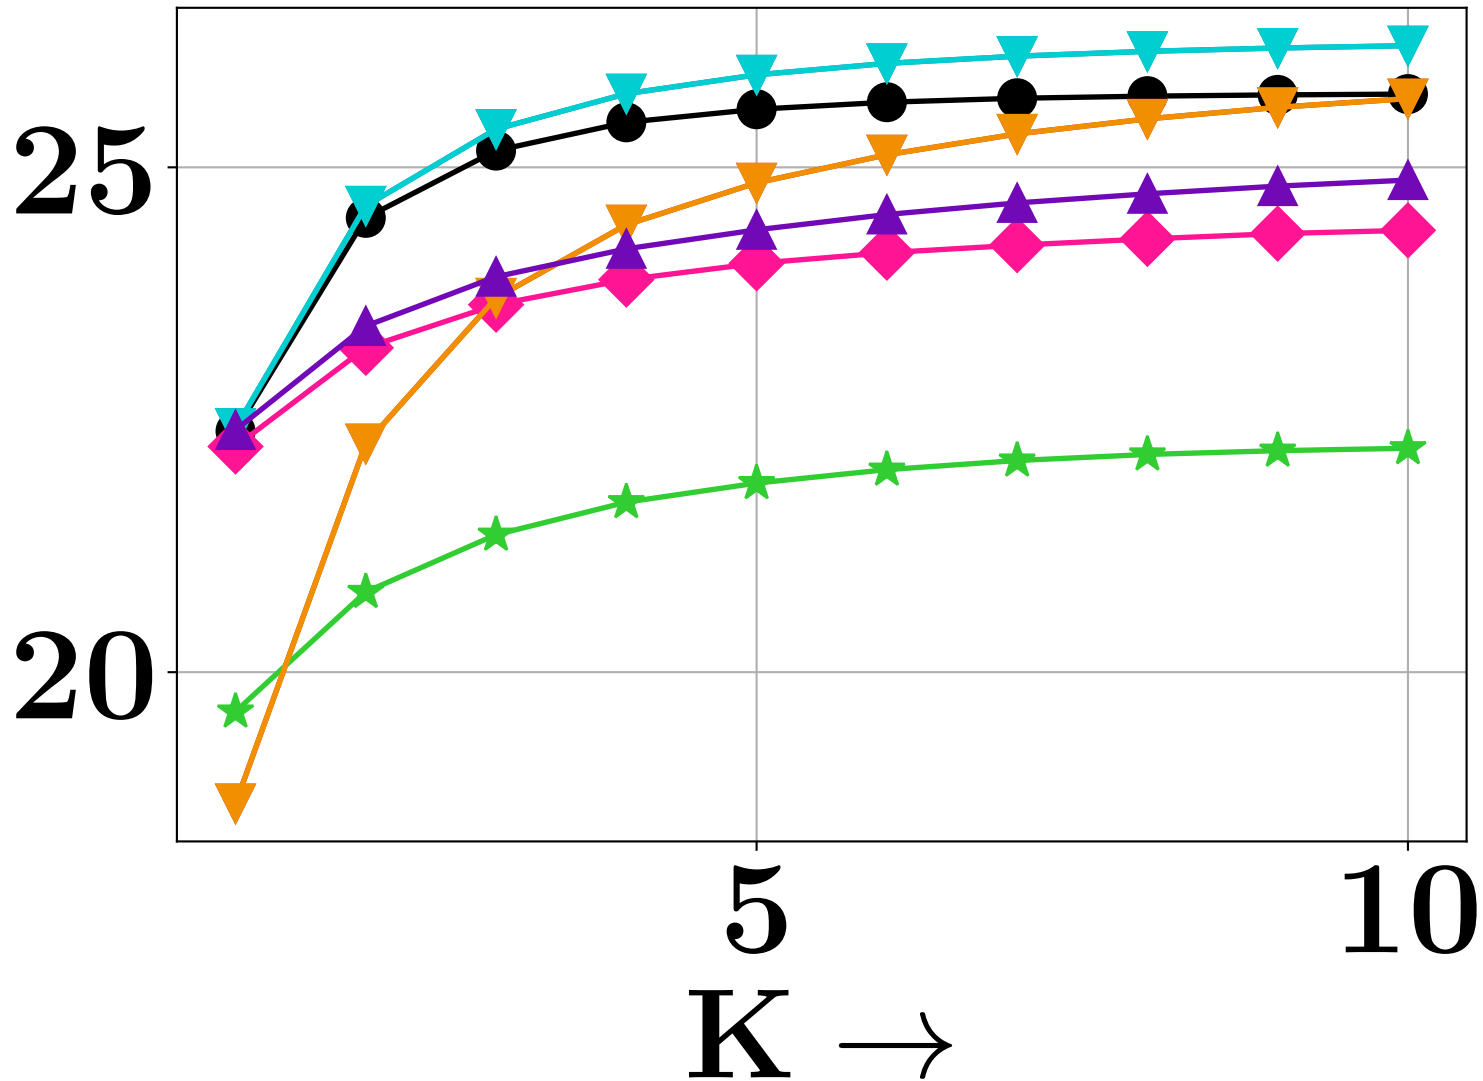

Supplement: supplementary_material [file writing_covK_supp.pdf › DISCO/notebooks/plots/writing_covK_supp.pdf]

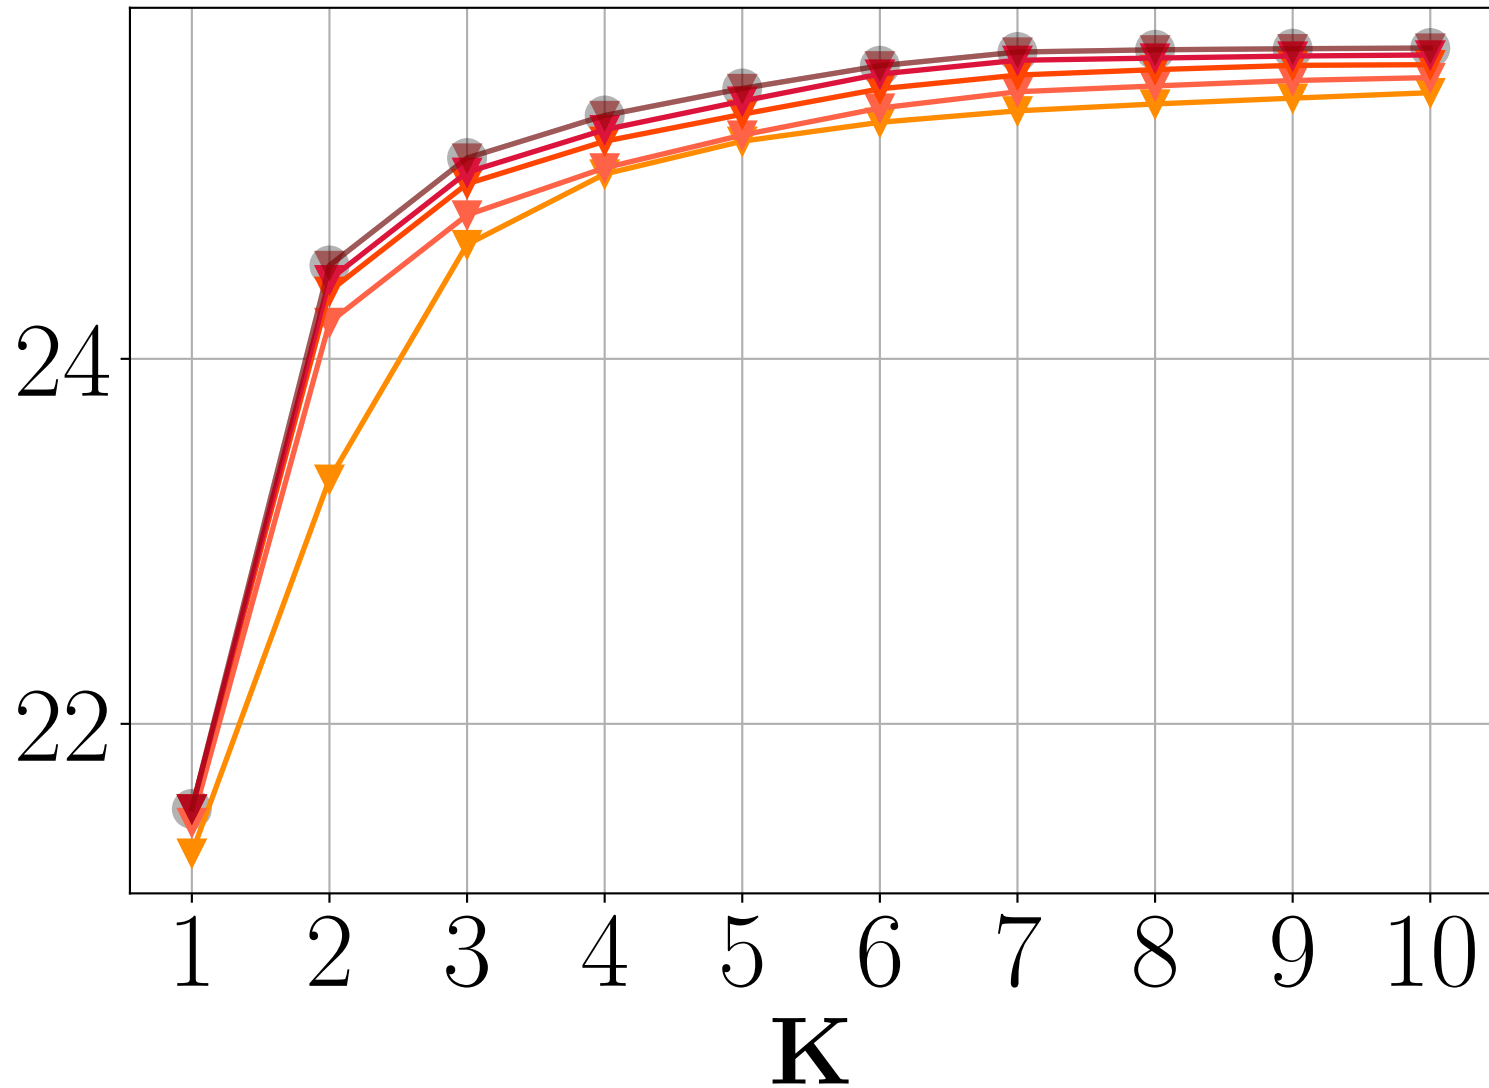

Supplement: supplementary_material [file writing_f_s_vs_k.pdf › DISCO/notebooks/plots/writing_f_s_vs_k.pdf]

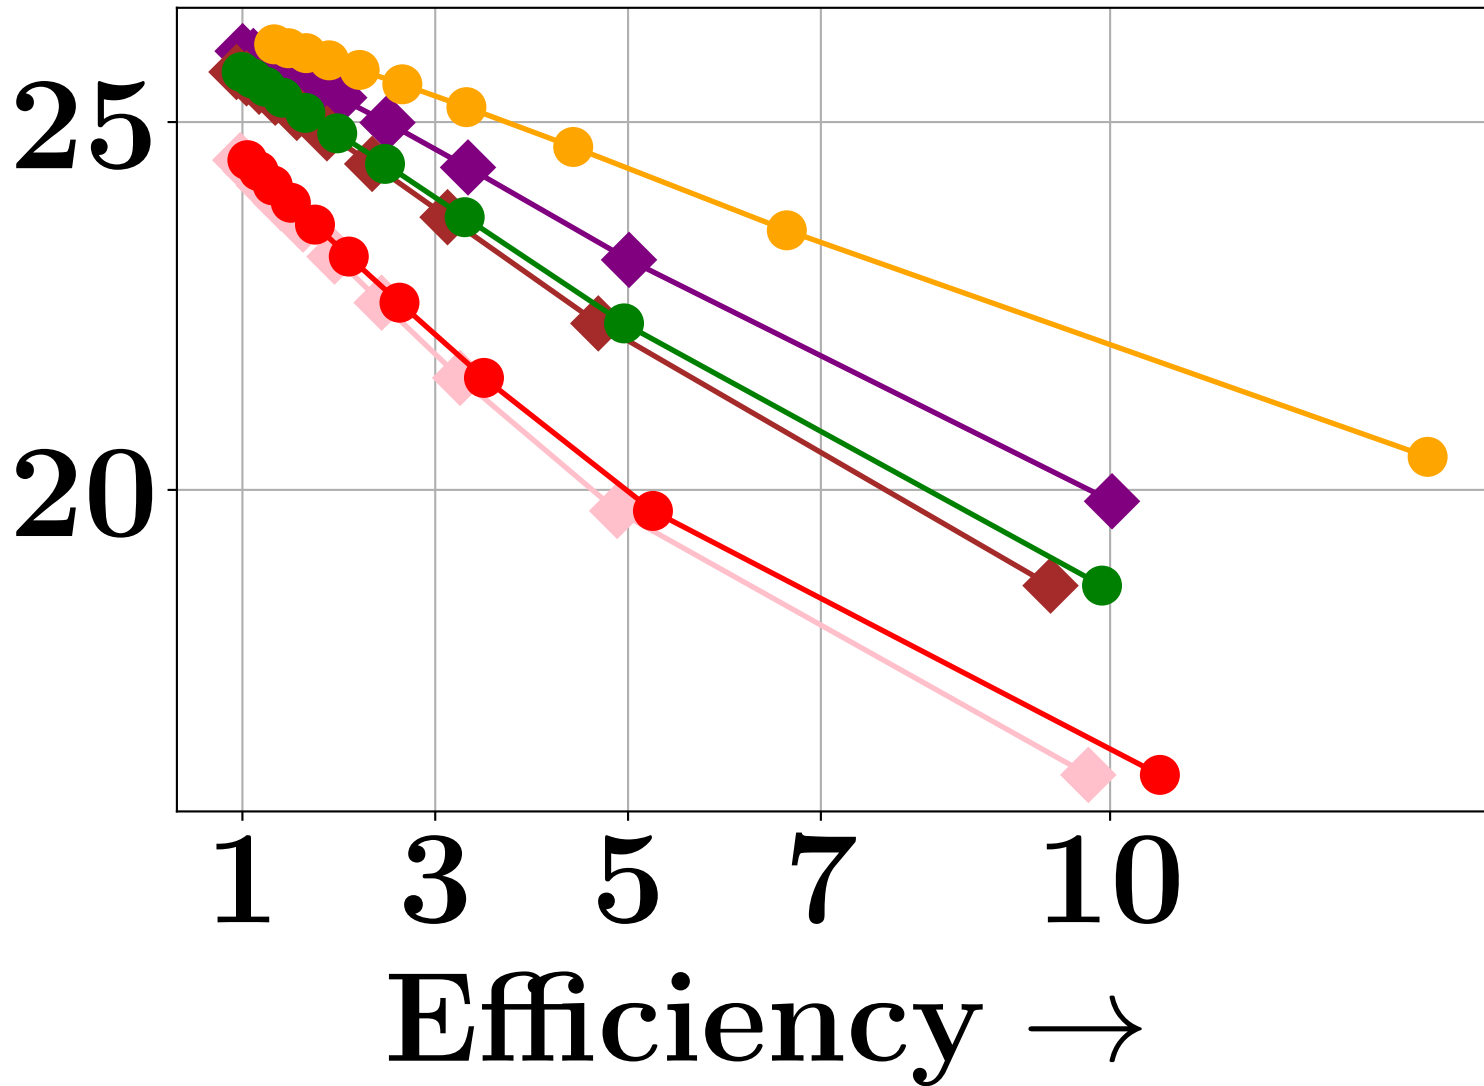

Supplement: supplementary_material [file writing_greedy_supp.pdf › DISCO/notebooks/plots/writing_greedy_supp.pdf]

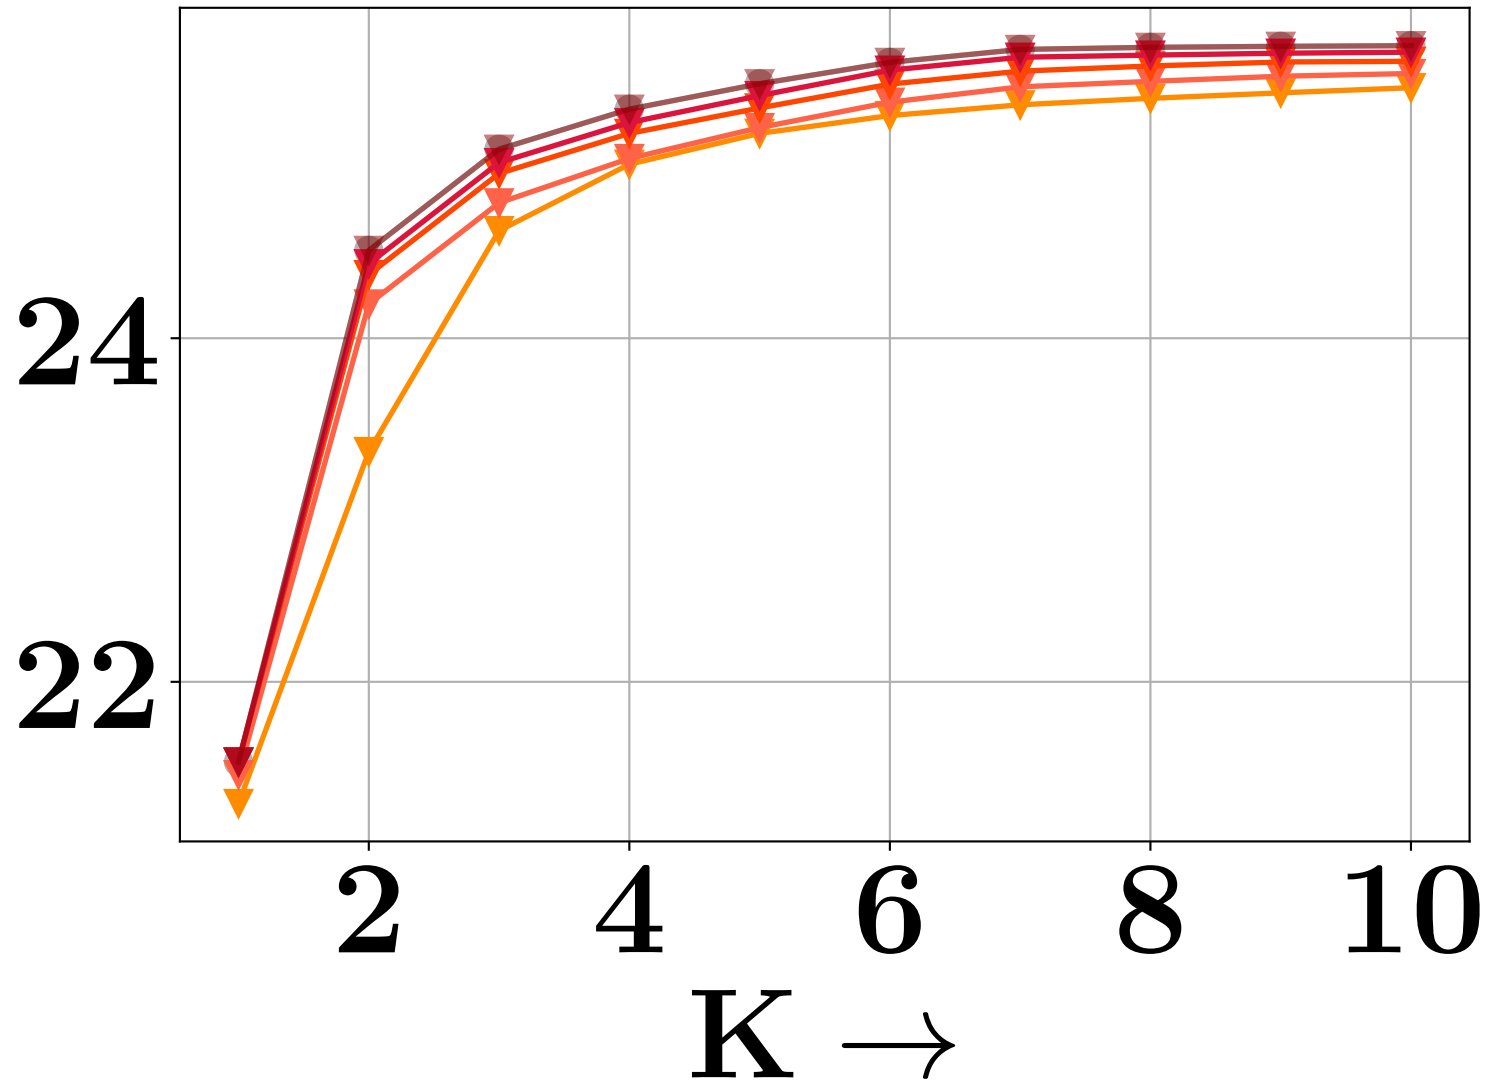

Supplement: supplementary_material [file writing_plot1.pdf › DISCO/notebooks/plots/writing_plot1.pdf]

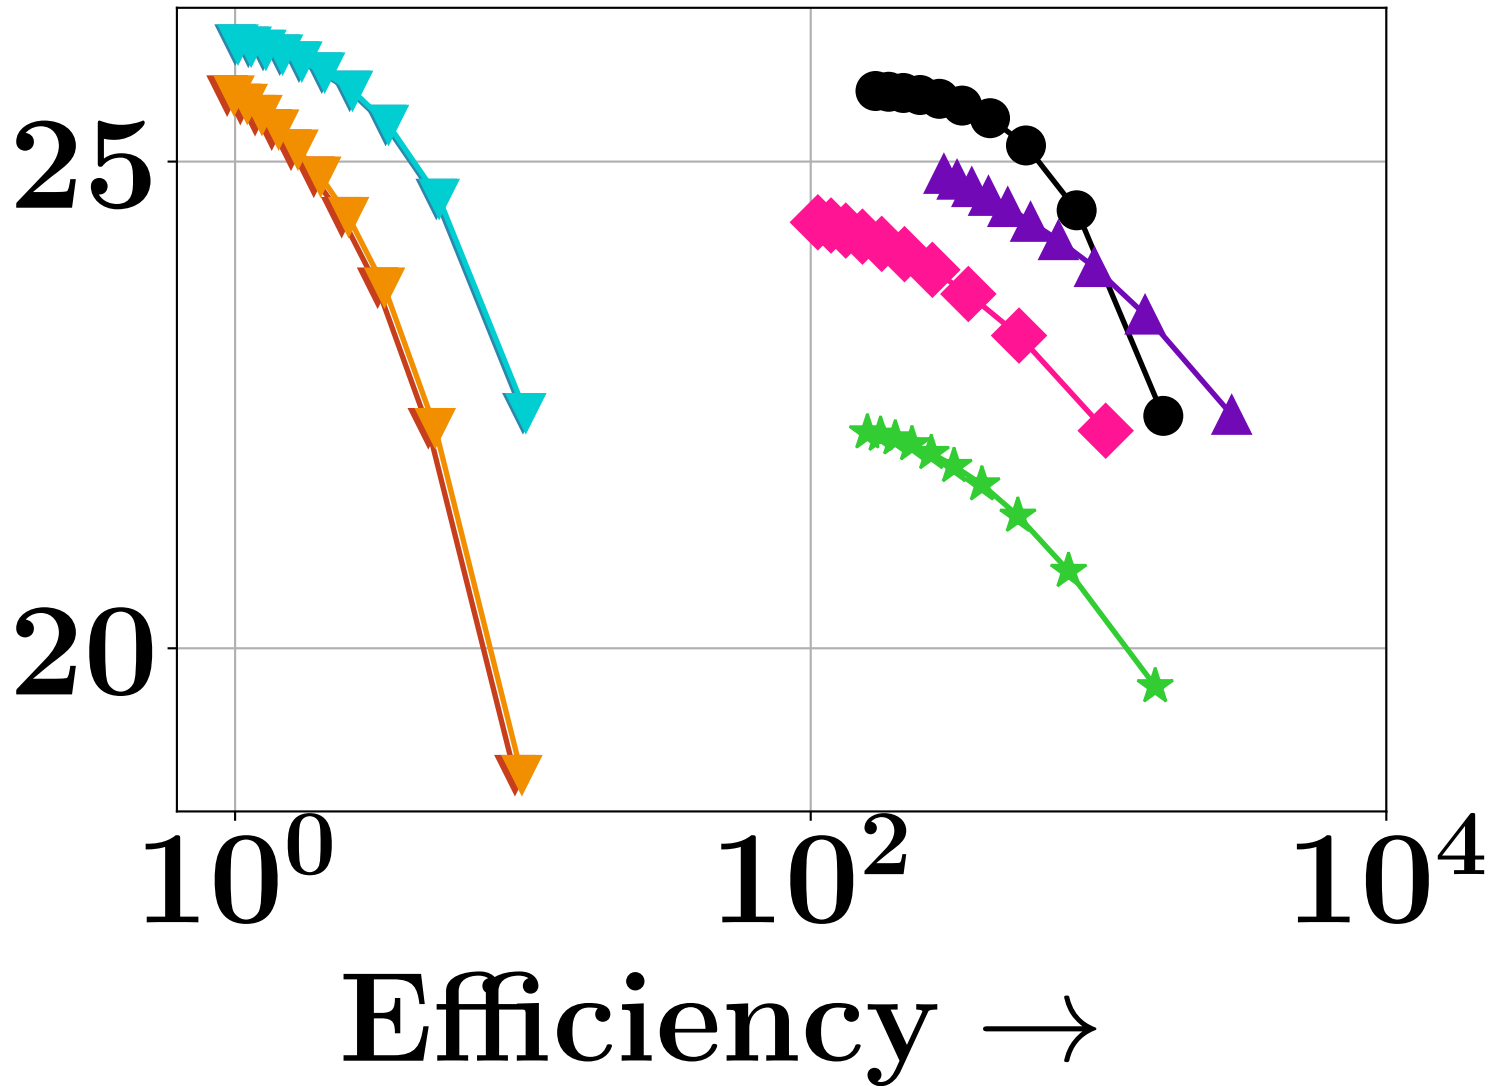

Supplement: supplementary_material [file writing_plot2.pdf › DISCO/notebooks/plots/writing_plot2.pdf]

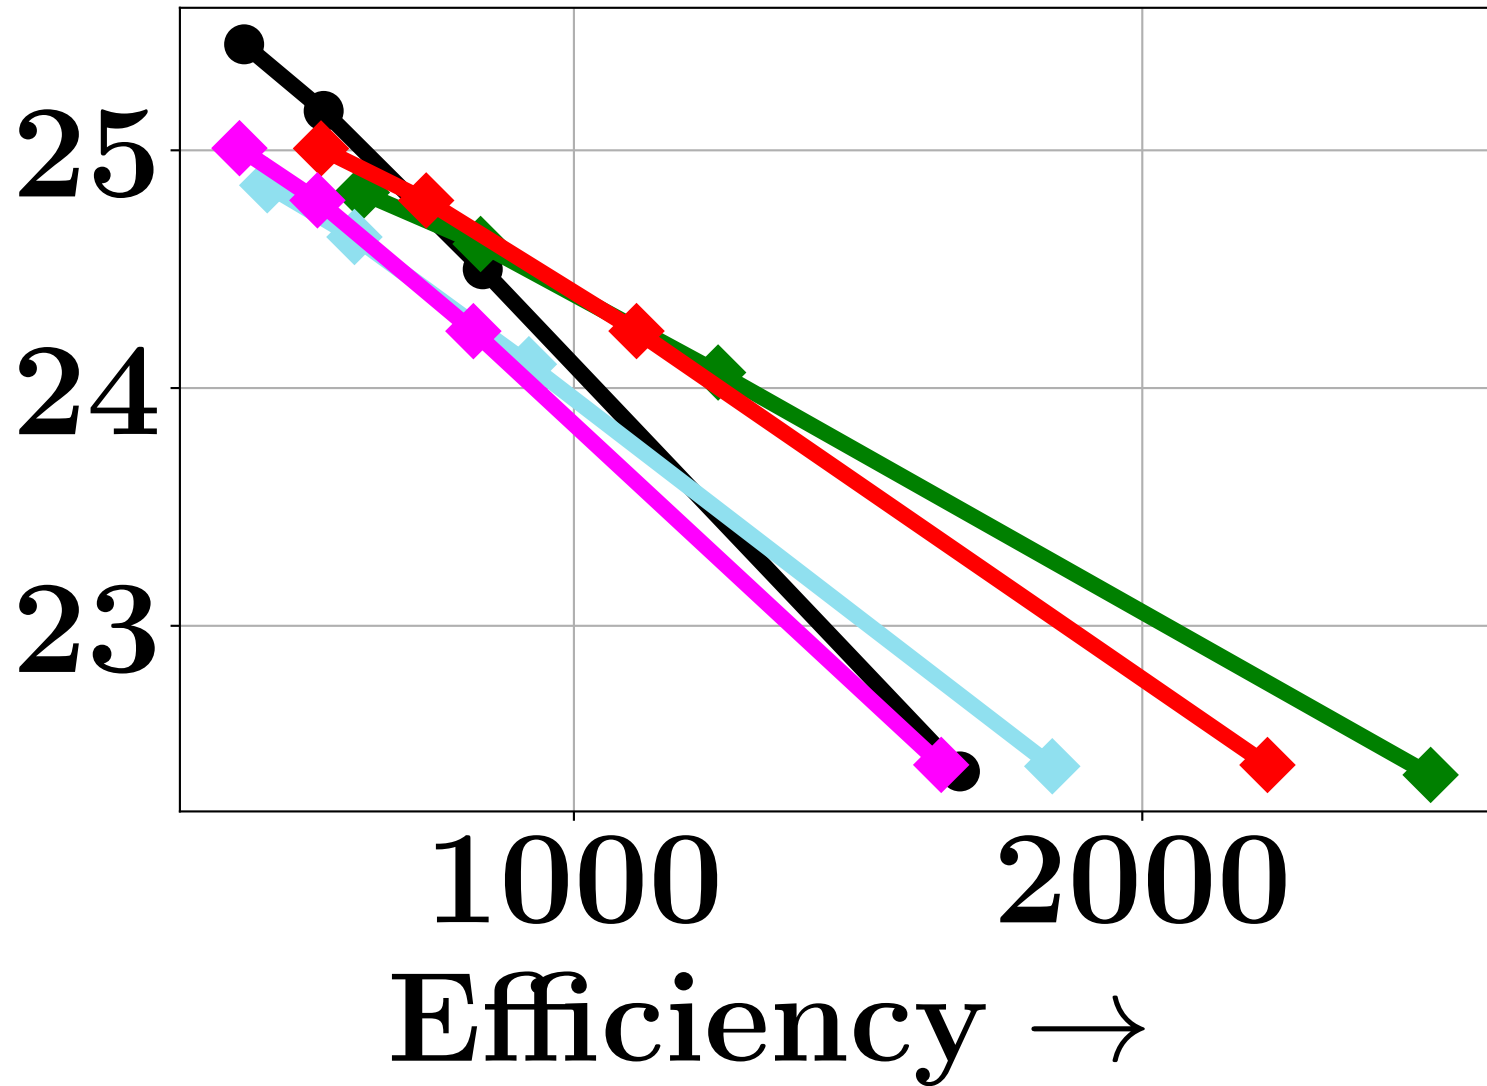

Supplement: supplementary_material [file writing_plot_4_1.pdf › DISCO/notebooks/plots/writing_plot_4_1.pdf]

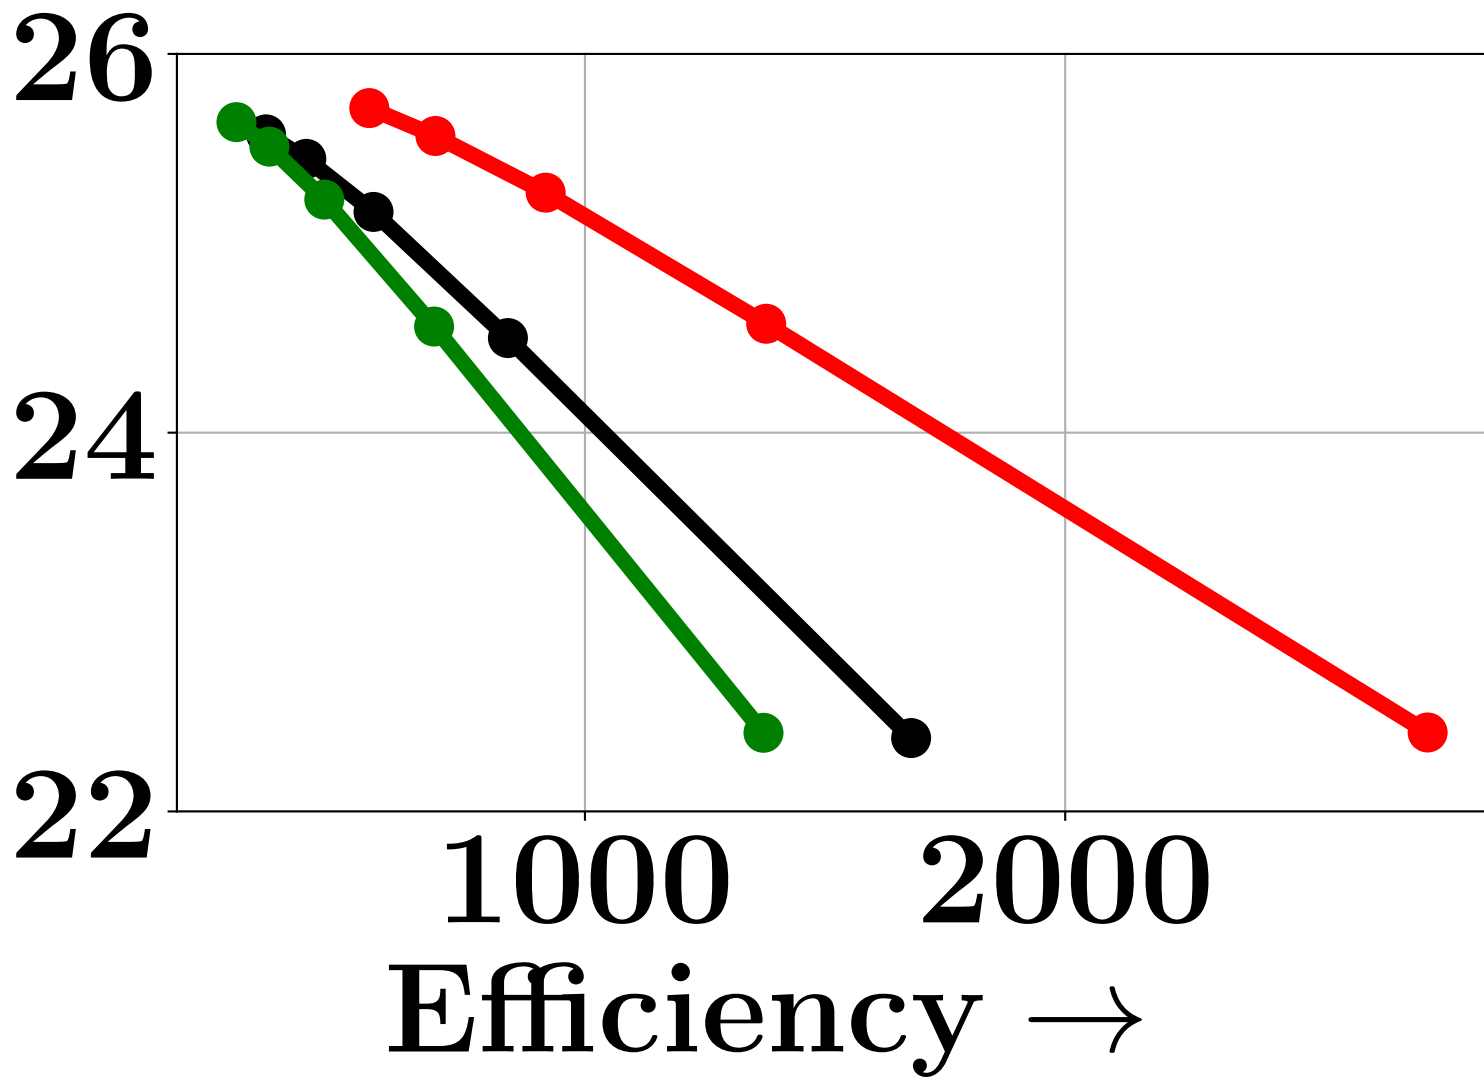

Supplement: supplementary_material [file writing_plot_4_2.pdf › DISCO/notebooks/plots/writing_plot_4_2.pdf]
